# Supplementary material
Source: publisher figshare collection journal article supplement (https://acs.figshare.com/ndownloader/files/4127470)

## *Supporting Information*

# **A Quick Installation of 1,4-Difunctionality via Regioselective Nickel-Catalyzed Reductive Coupling of Ynoates and Aldehydes**

Sanjeewa K. Rodrigo and Hairong Guan\*

*Department of Chemistry, University of Cincinnati, P. O. Box 21072, Cincinnati, Ohio 45221-0172, United States*

E-mail: [hairong.guan@uc.edu](mailto:hairong.guan@uc.edu)

## **Table of Contents**

|                                                                                                             |      |
|-------------------------------------------------------------------------------------------------------------|------|
| Deuterium-labeling experiments.....                                                                         | S-2  |
| <sup>1</sup> H and <sup>31</sup> C{ <sup>1</sup> H} NMR spectra of <b>3a</b> and <b>3a'</b> (Table 1) ..... | S-3  |
| <sup>1</sup> H and <sup>31</sup> C{ <sup>1</sup> H} NMR spectra of <b>3b-j</b> (Table 2) .....              | S-7  |
| <sup>1</sup> H and <sup>31</sup> C{ <sup>1</sup> H} NMR spectra of <b>3k-s</b> (Table 3) .....              | S-25 |
| <sup>1</sup> H and <sup>31</sup> C{ <sup>1</sup> H} NMR spectra of <b>4-8</b> (Scheme 3) .....              | S-43 |

**Deuterium-labeling experiments.** (1) The general procedure was followed except that Et<sub>3</sub>SiD was used in place of Et<sub>3</sub>SiH. The isolated 1,4-difunctional product was analyzed by <sup>1</sup>H and <sup>2</sup>H NMR as shown below.

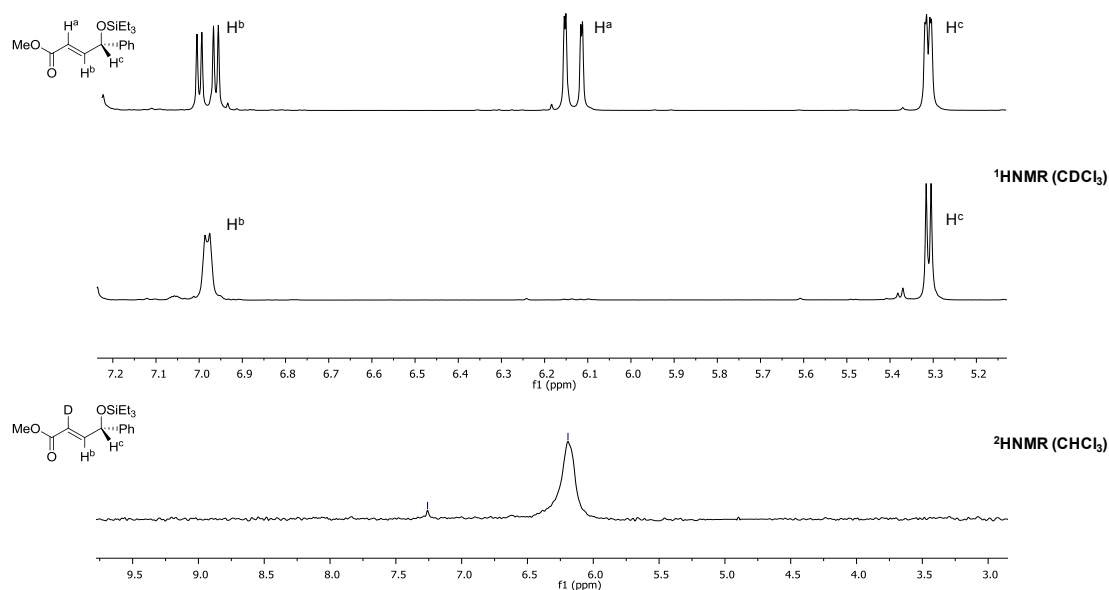

(2) The general procedure was followed except that PhCDO was used in place of PhCHO. The isolated 1,4-difunctional product was analyzed by <sup>1</sup>H and <sup>2</sup>H NMR as shown below.

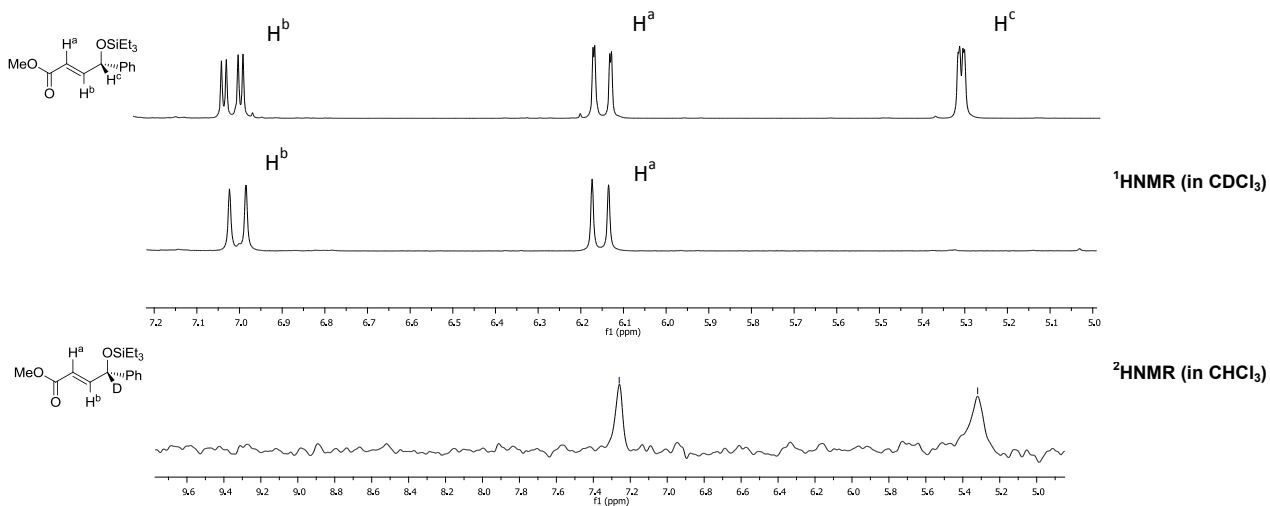

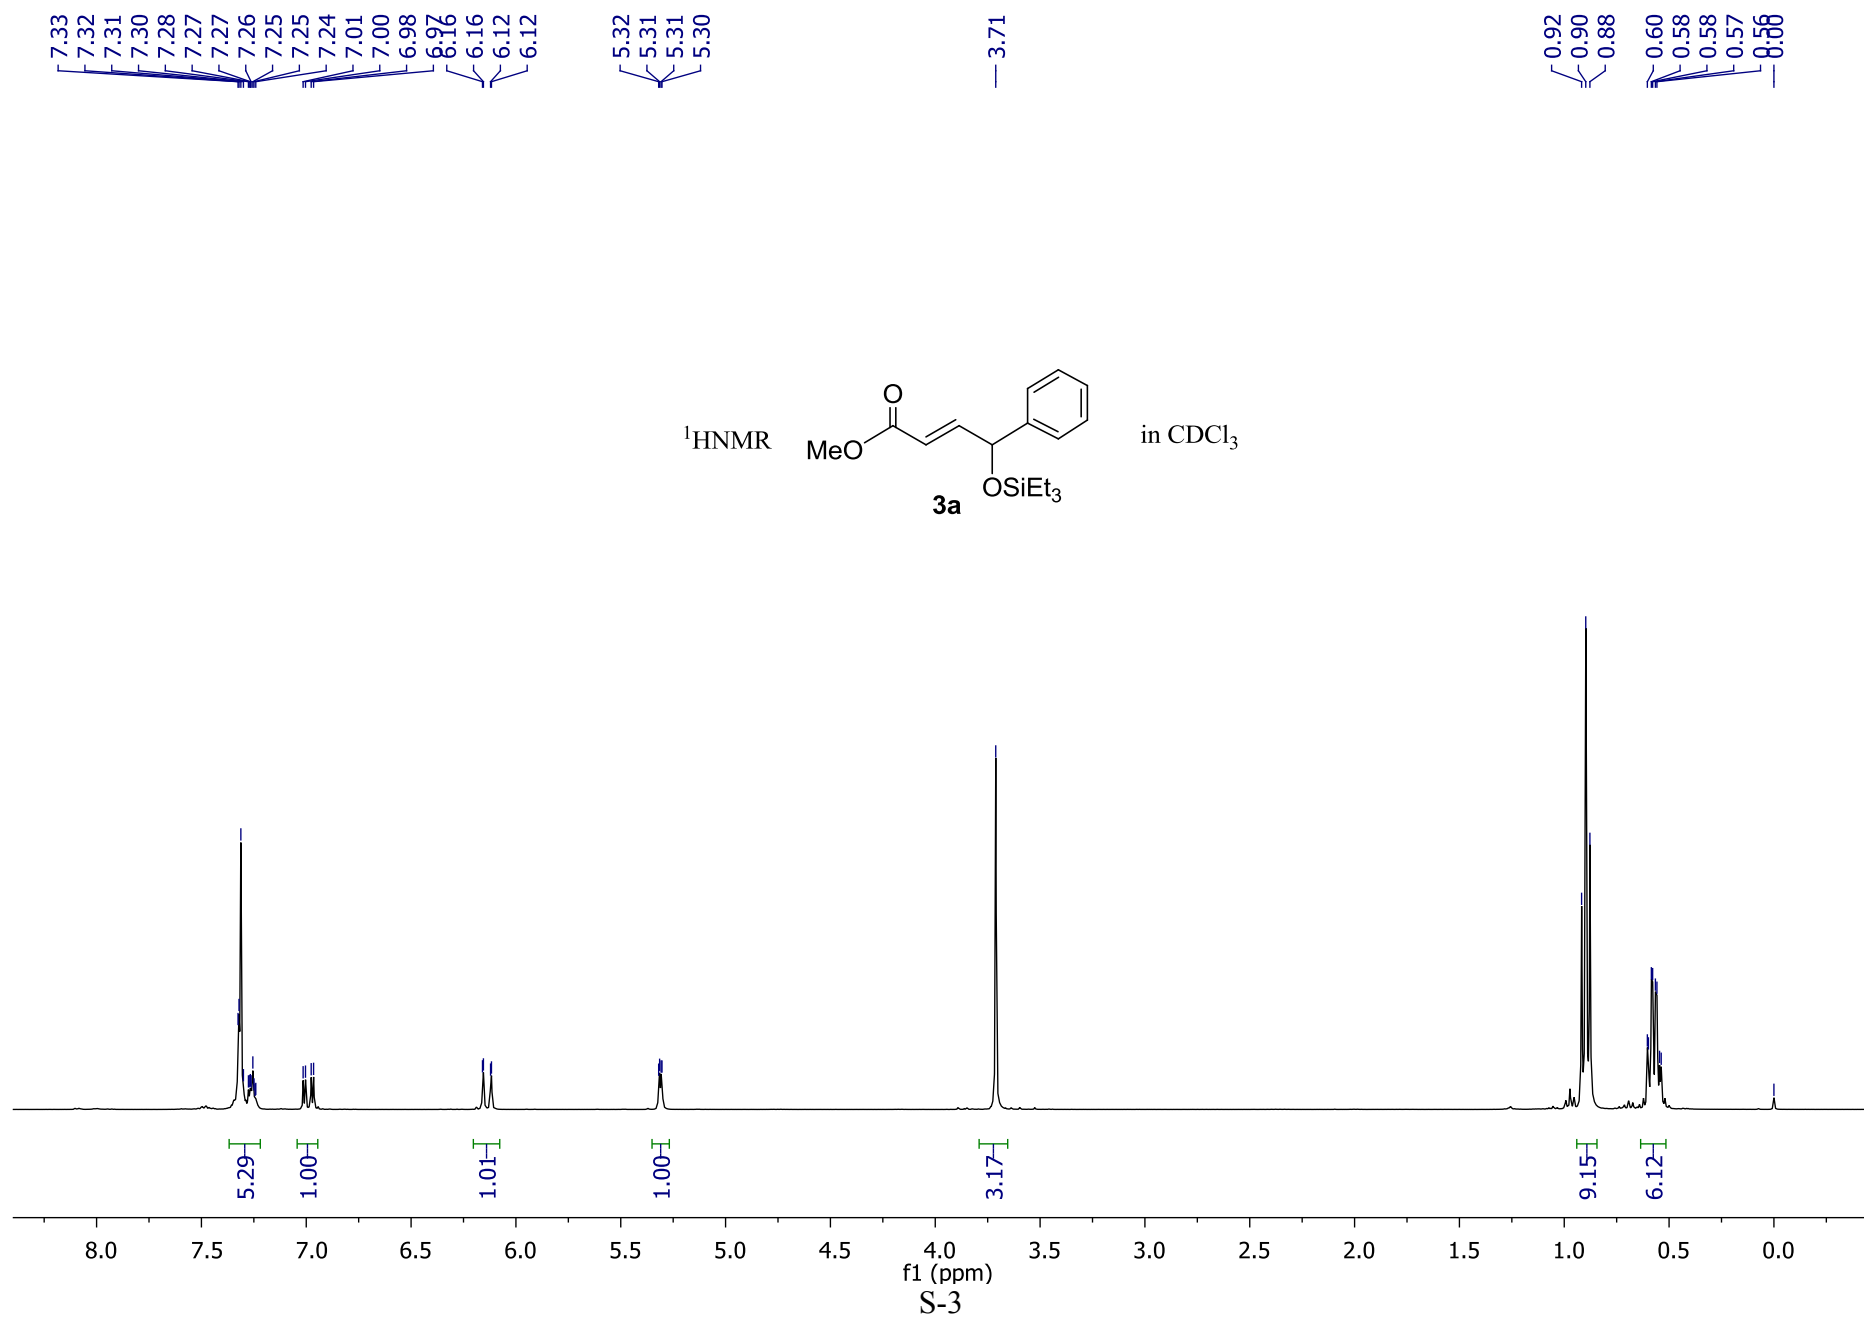

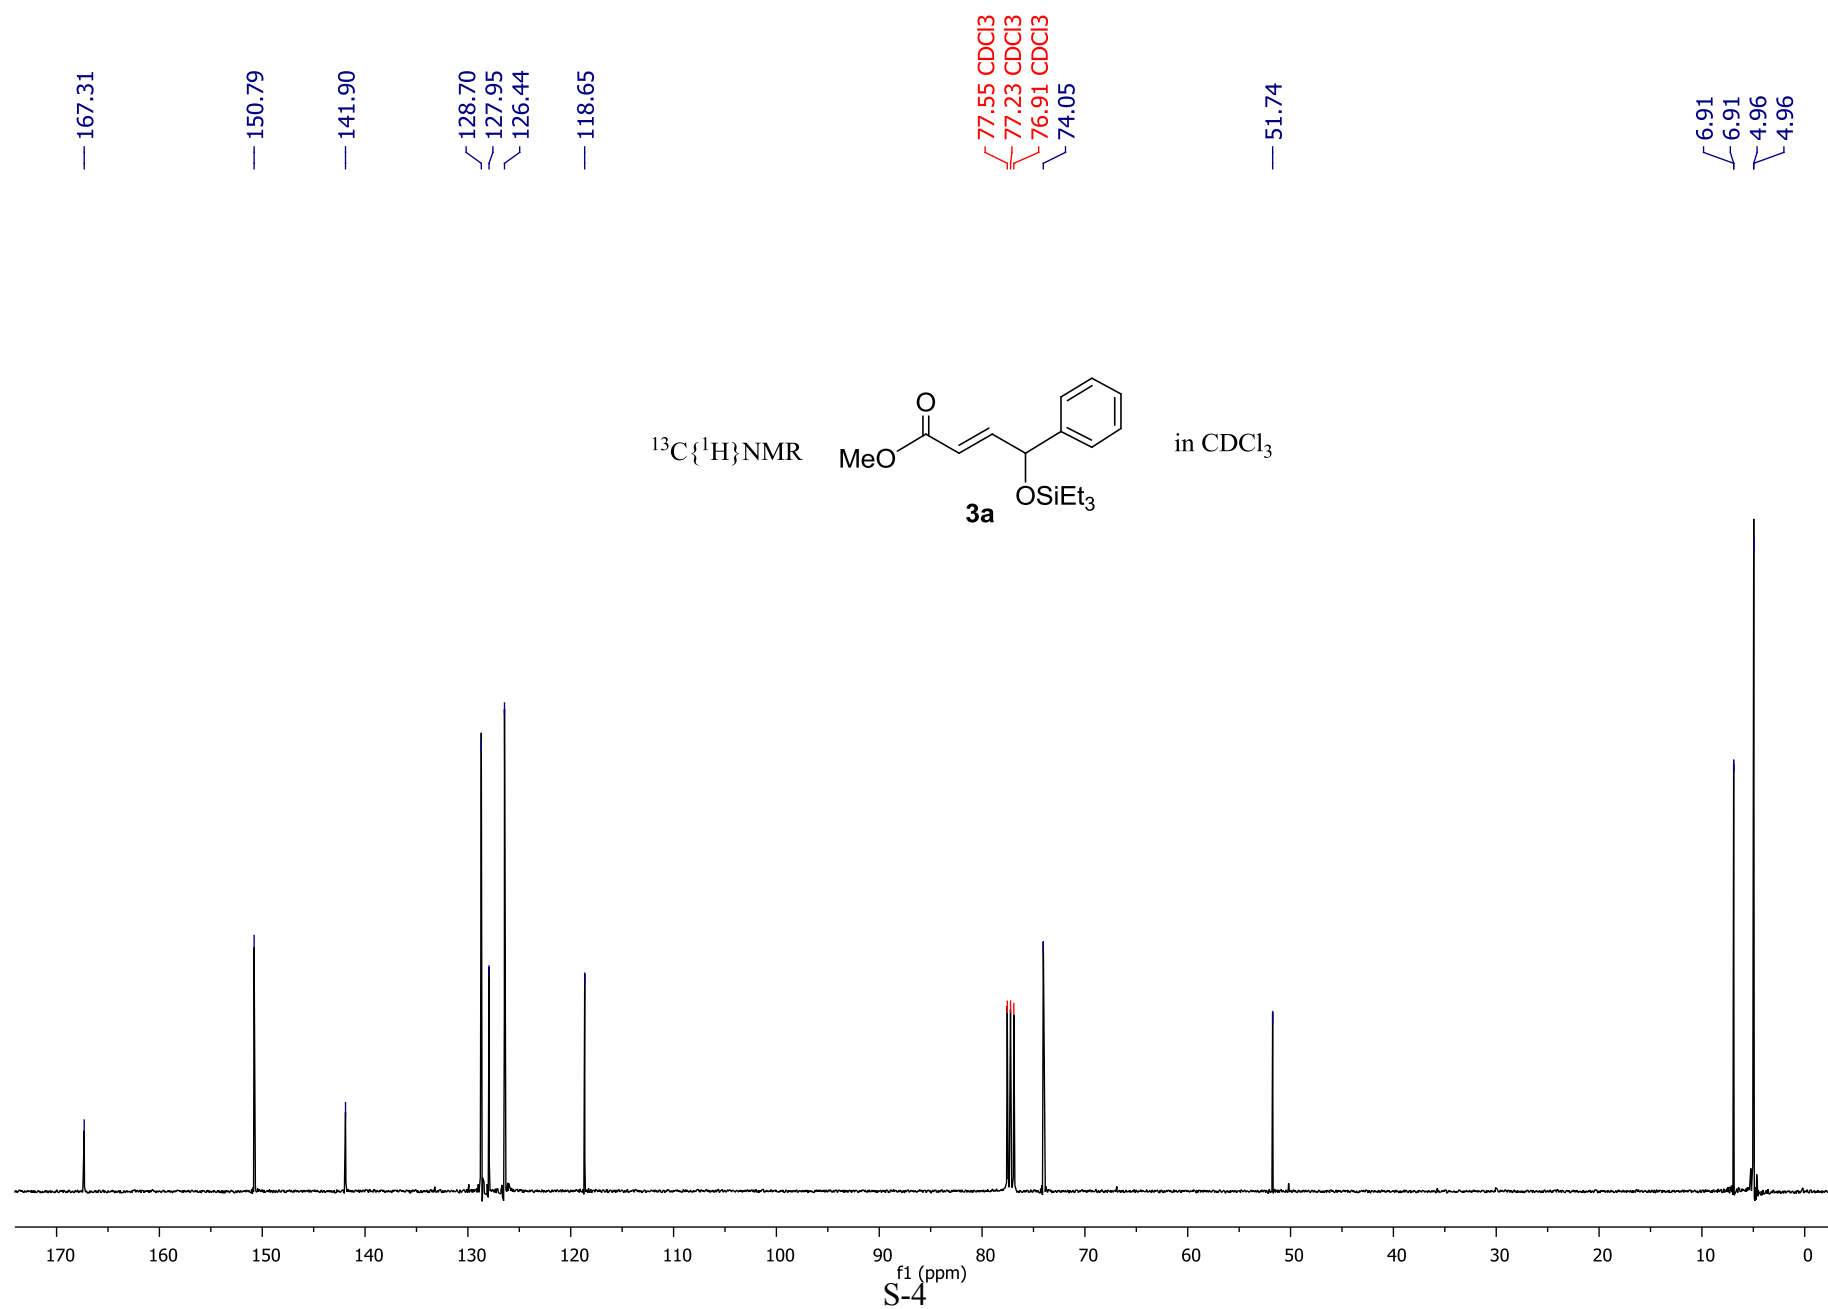

7.35  
7.29  
7.28  
7.26  
7.24  
7.24  
7.23  
7.22

6.26  
6.25  
6.10  
6.09  
5.61

3.67

0.88  
0.86  
0.84  
0.57  
0.57  
0.56  
0.55  
0.54  
0.53  
0.52  
0.51

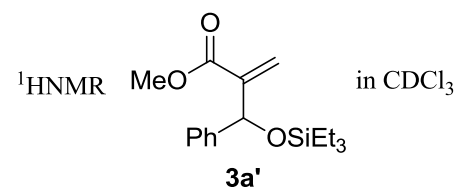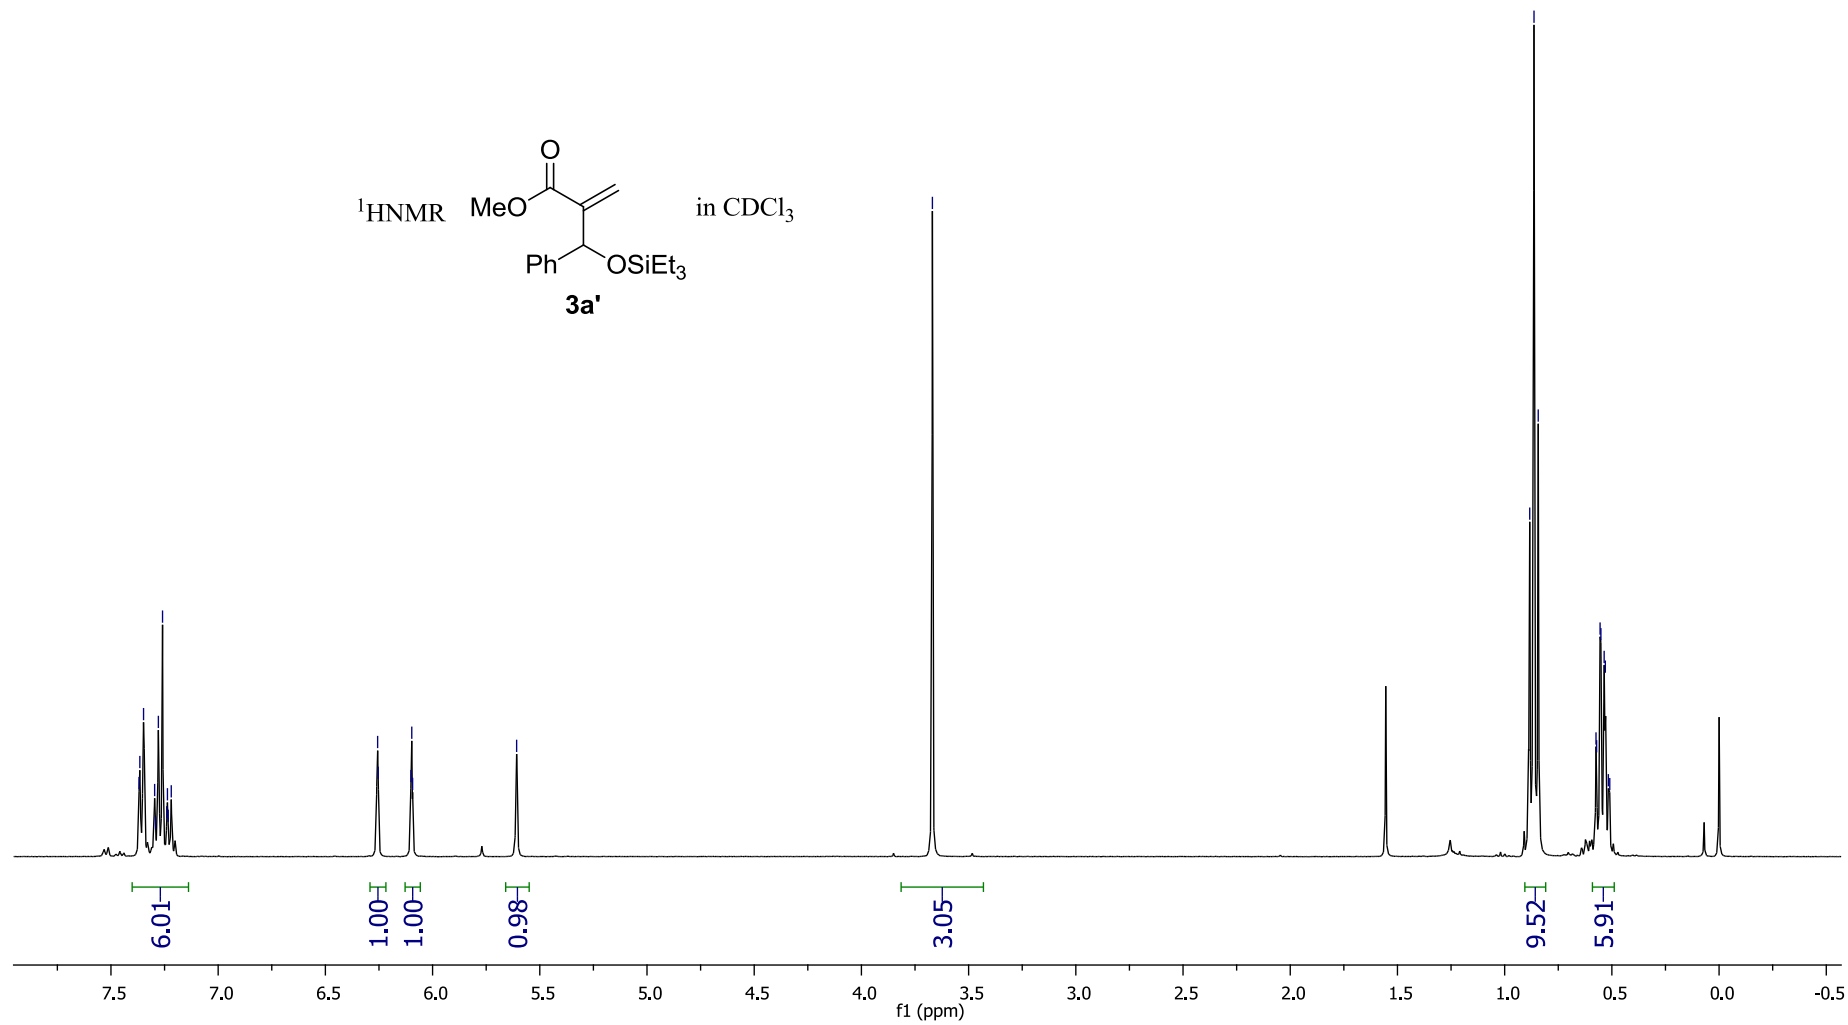

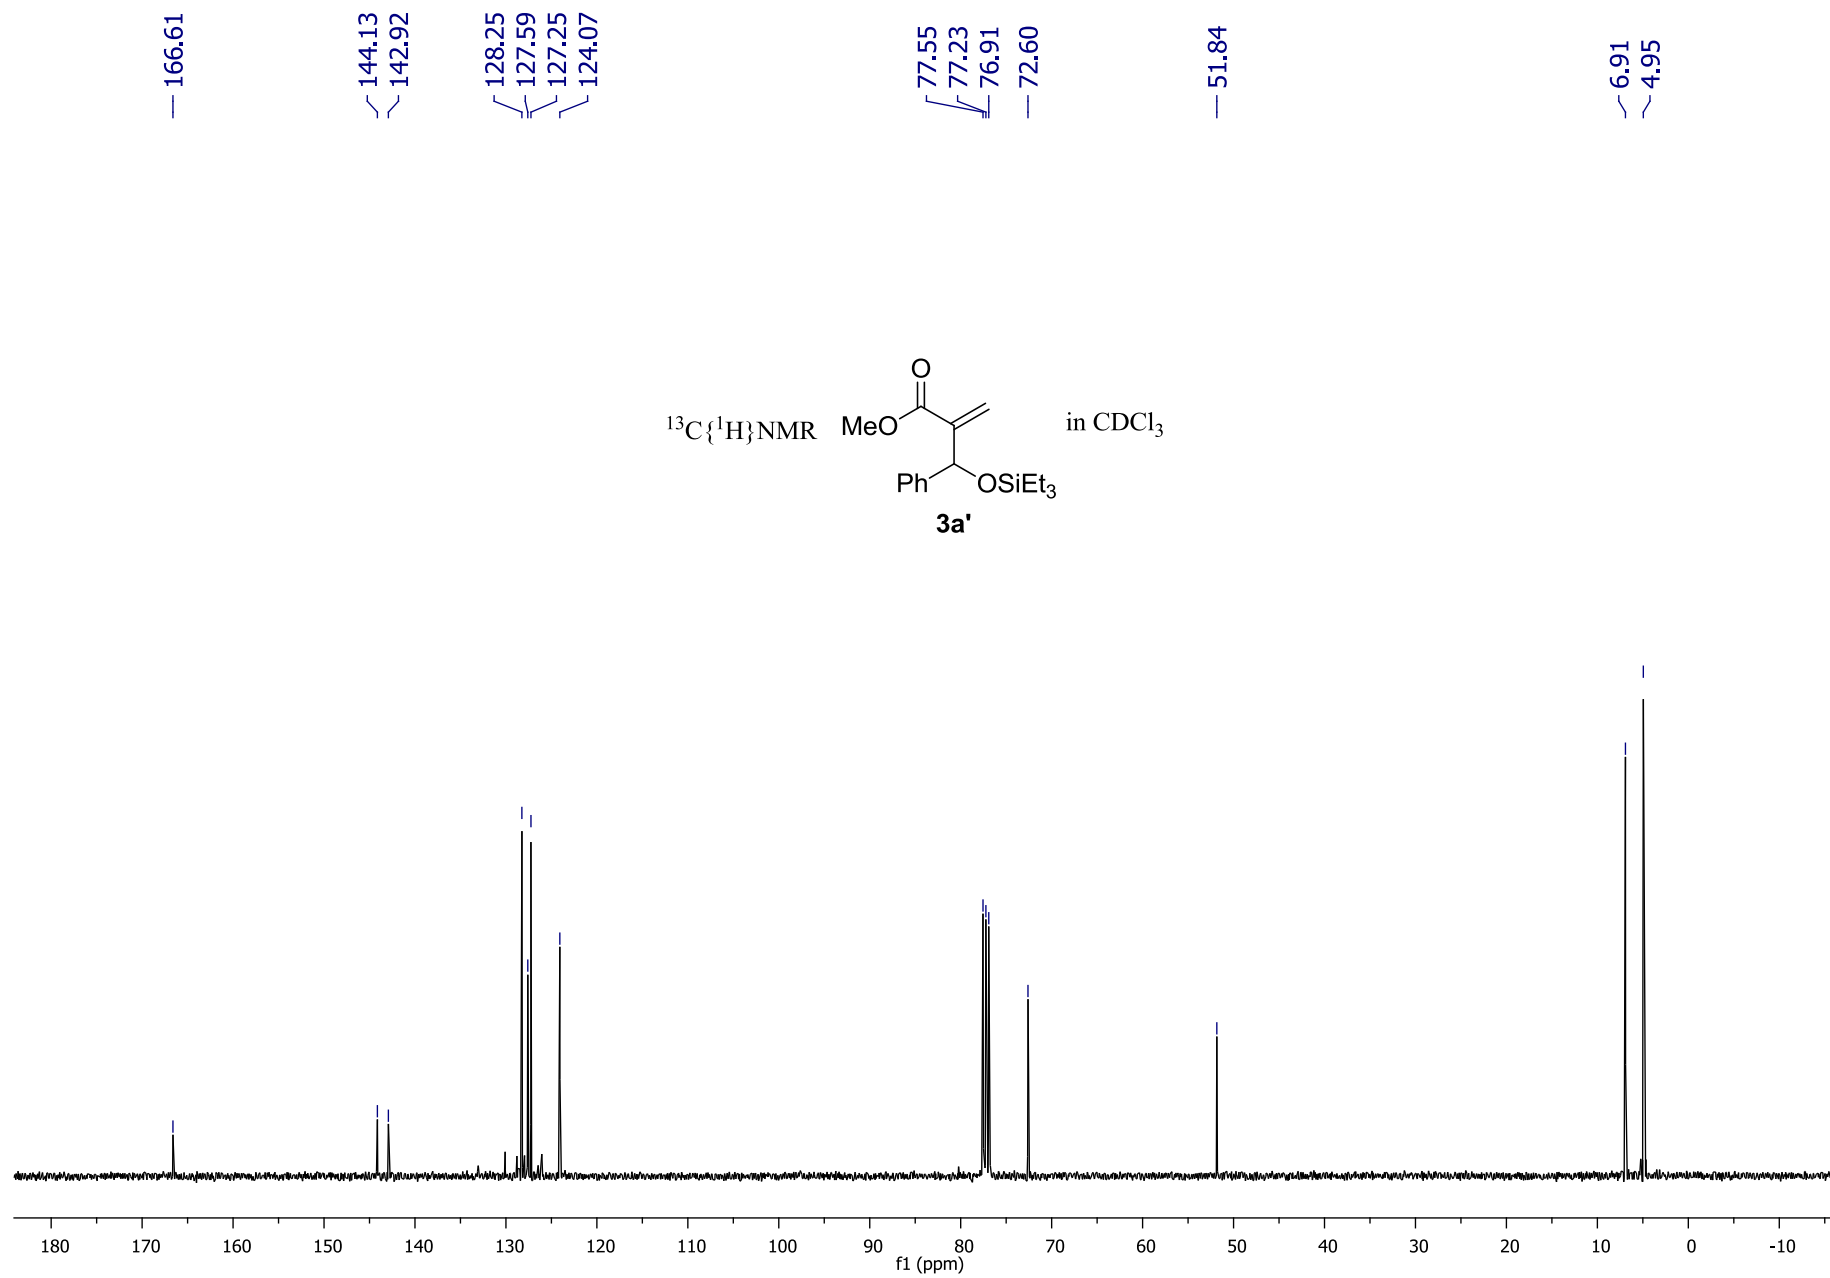

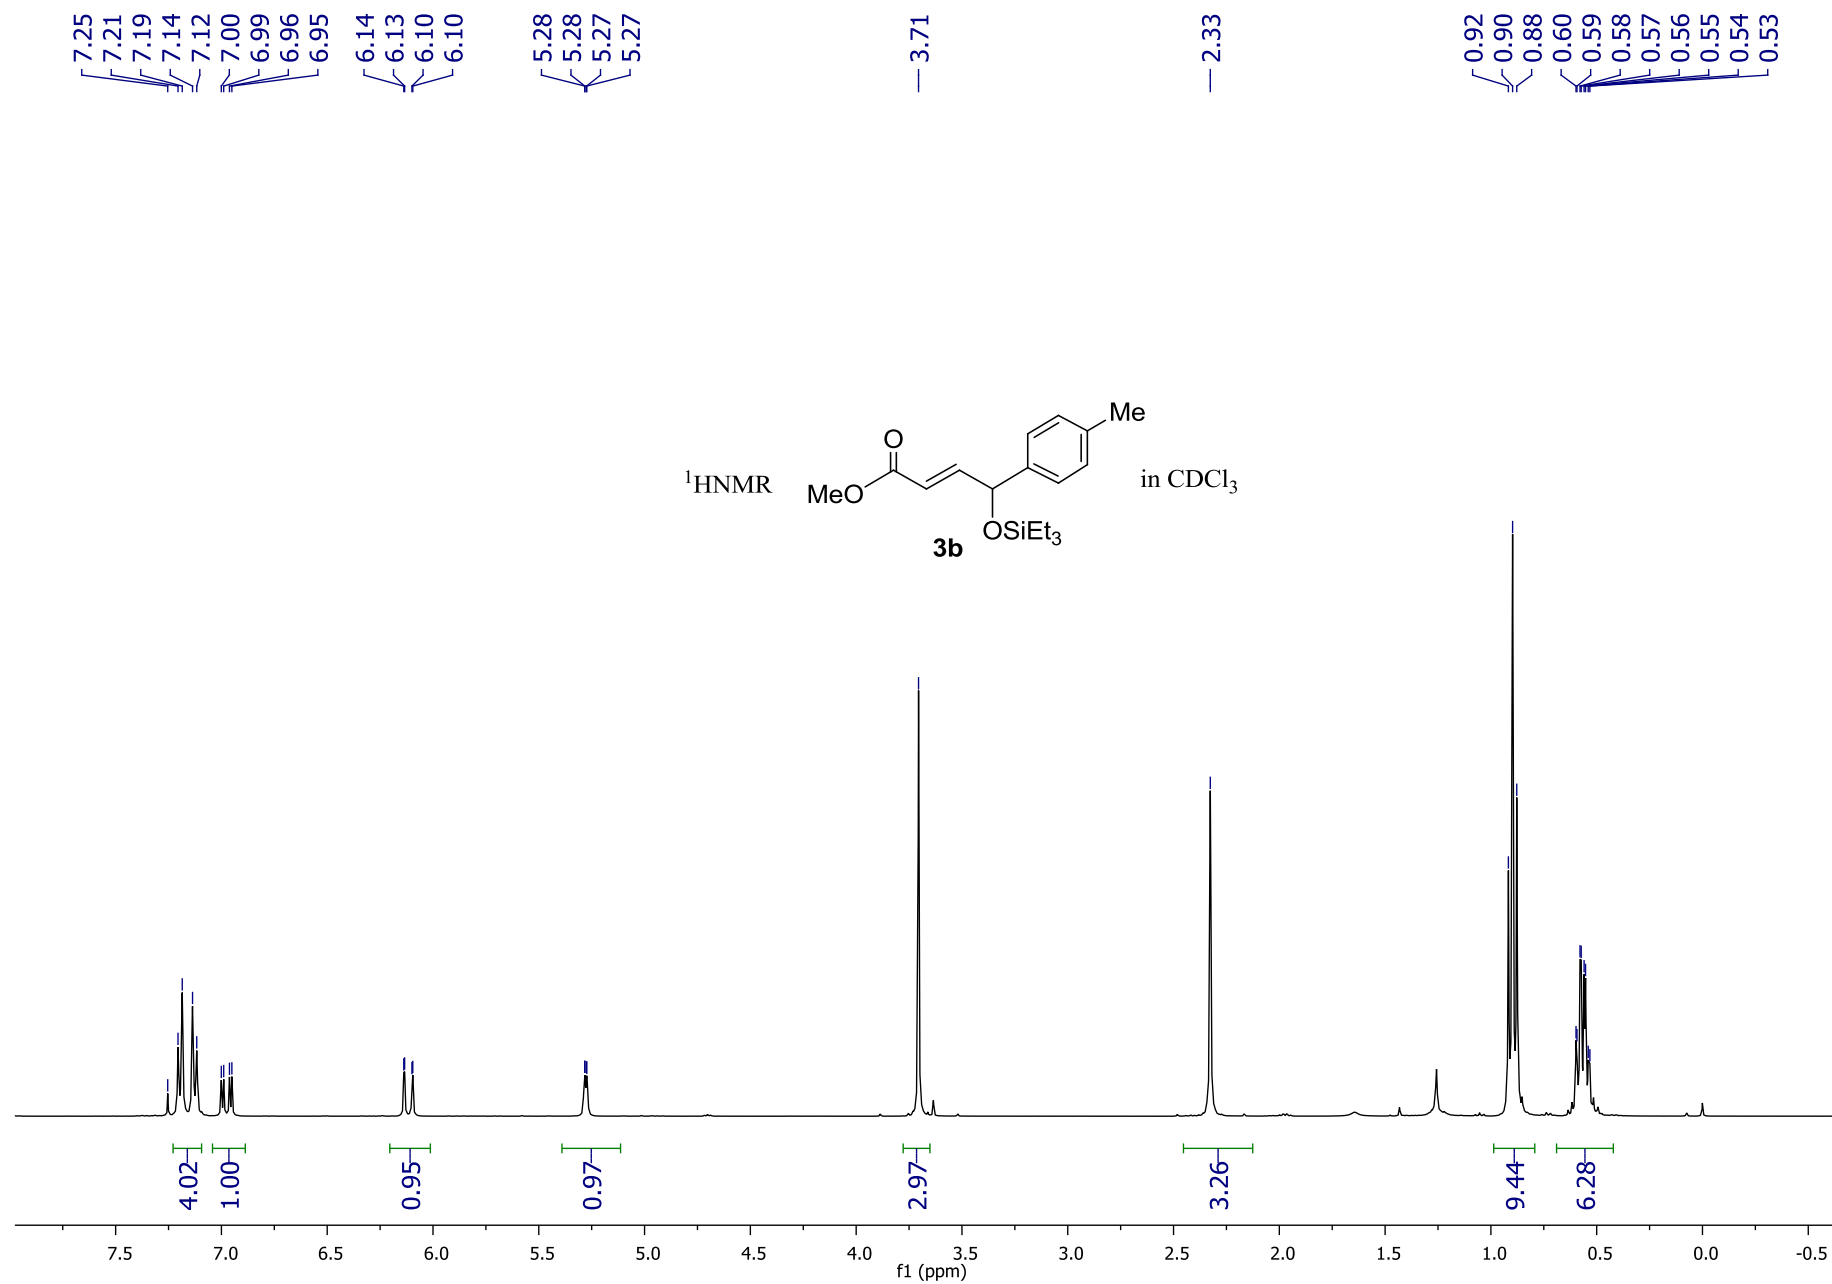

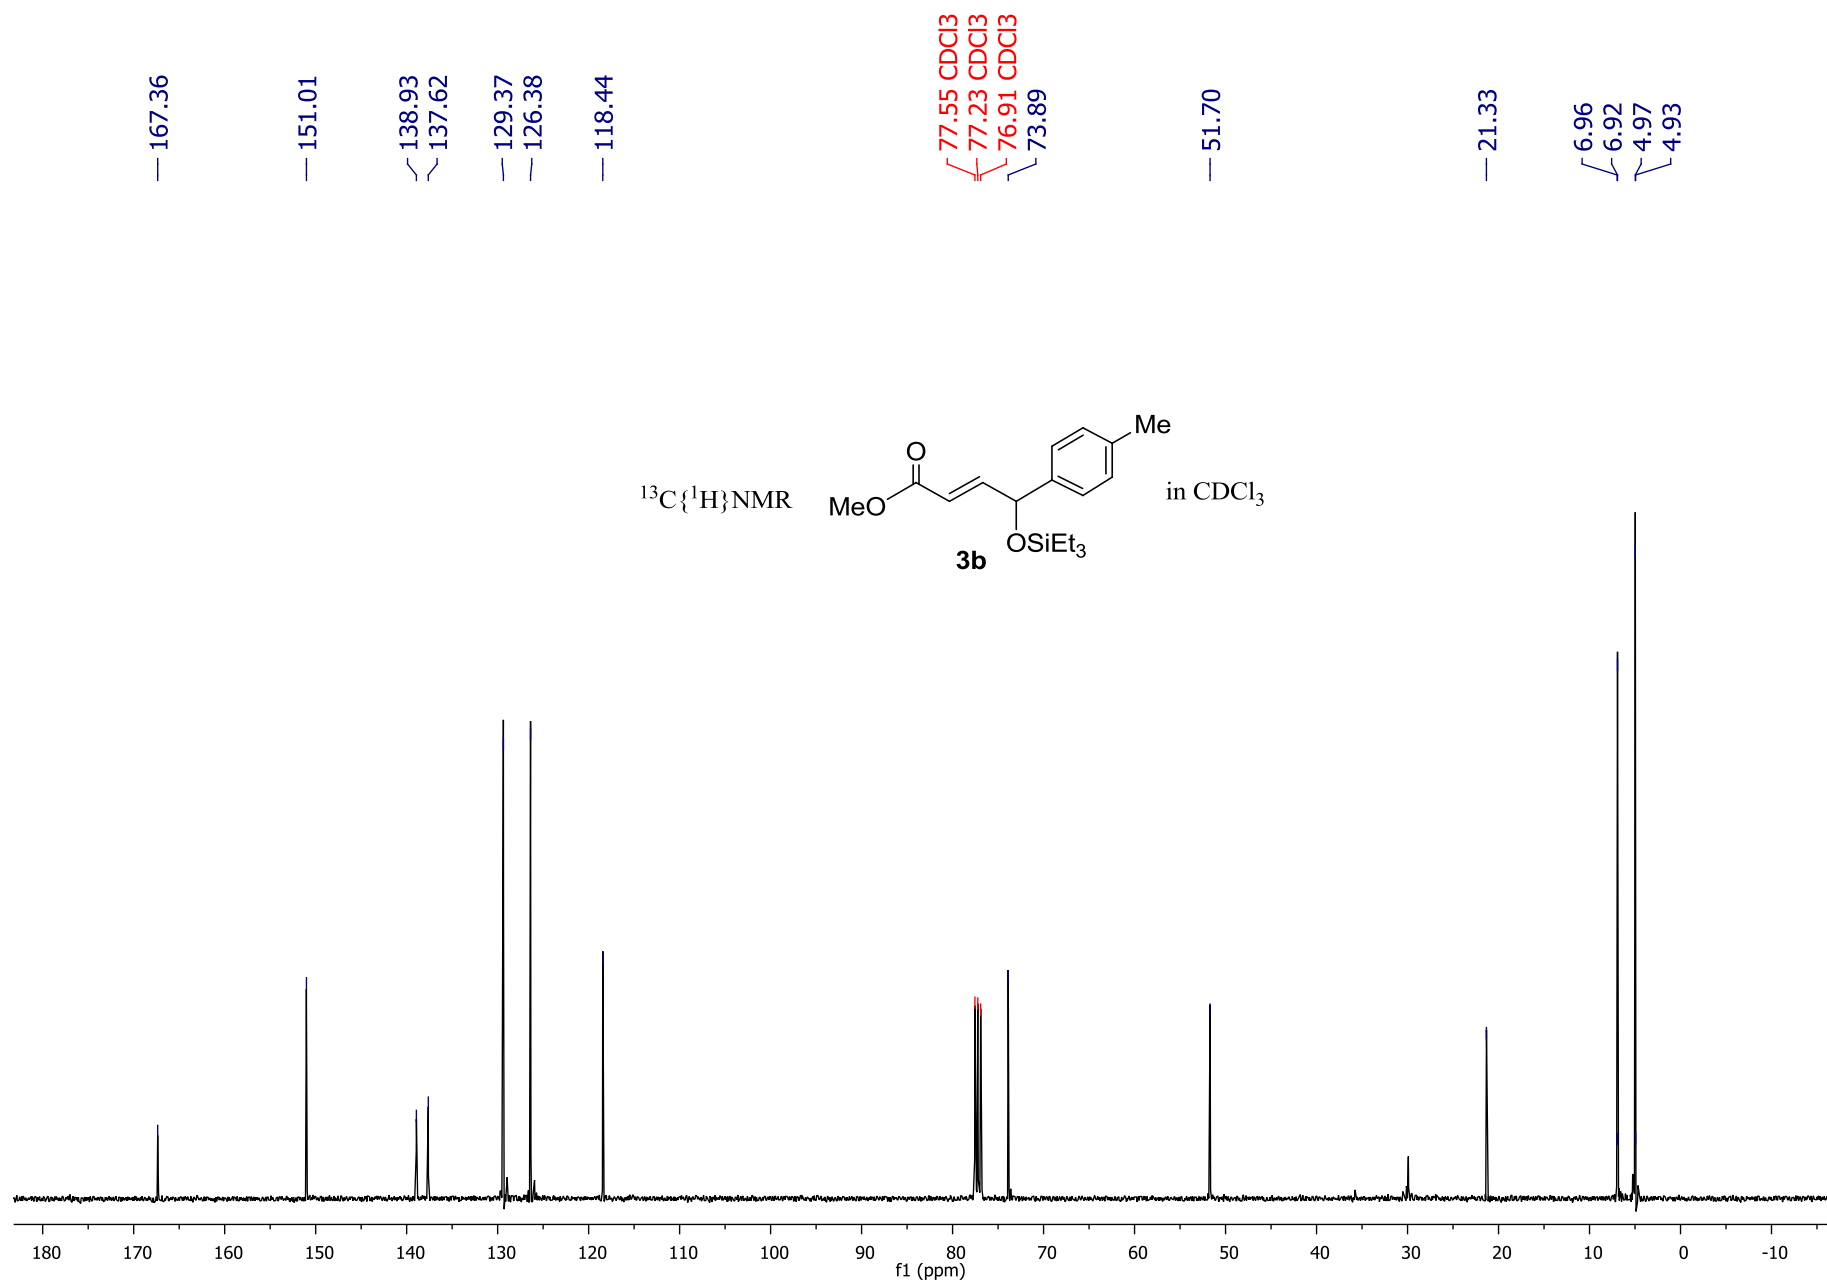



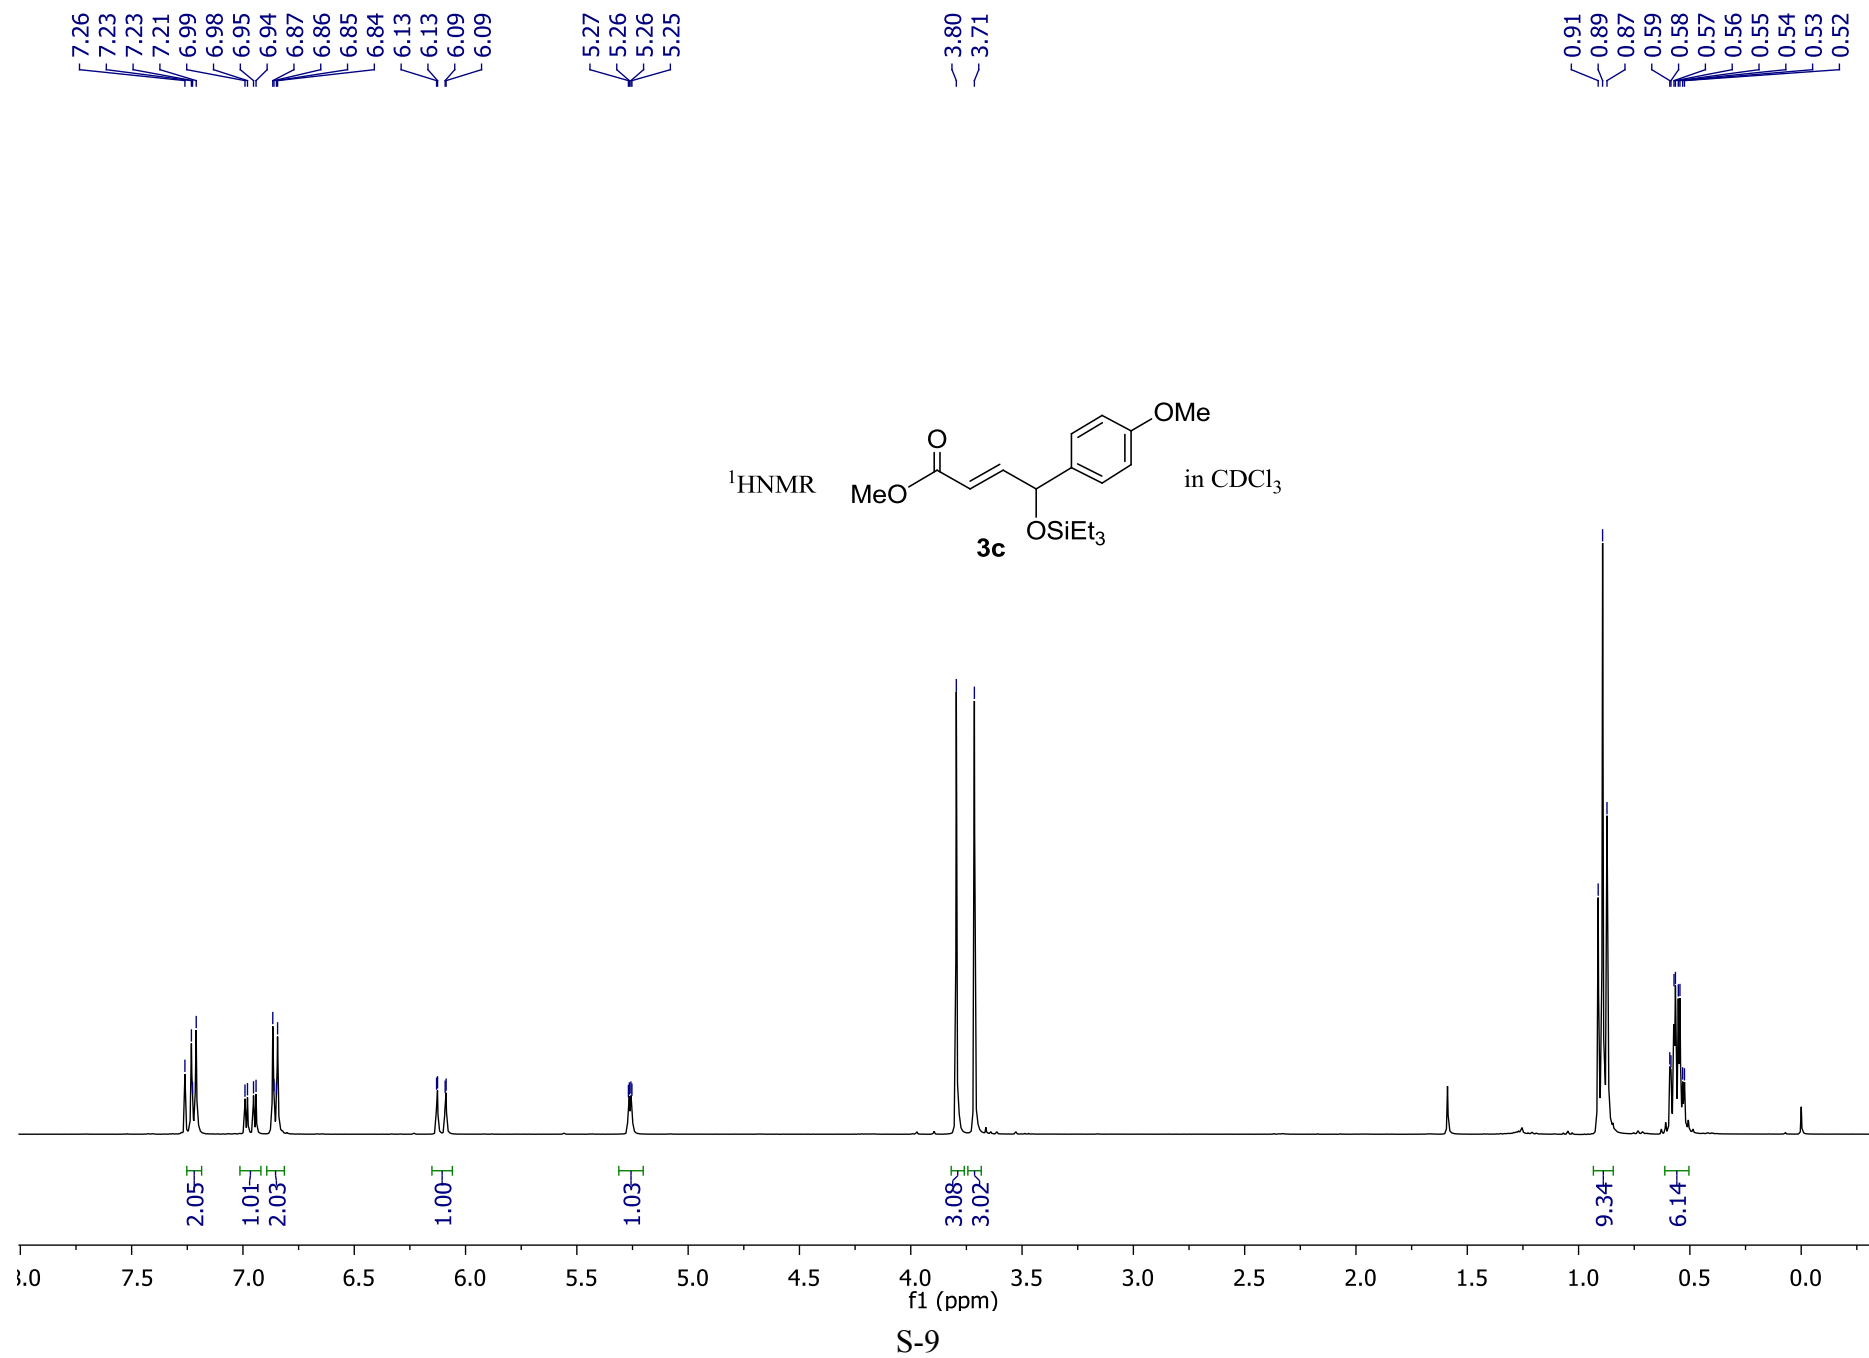

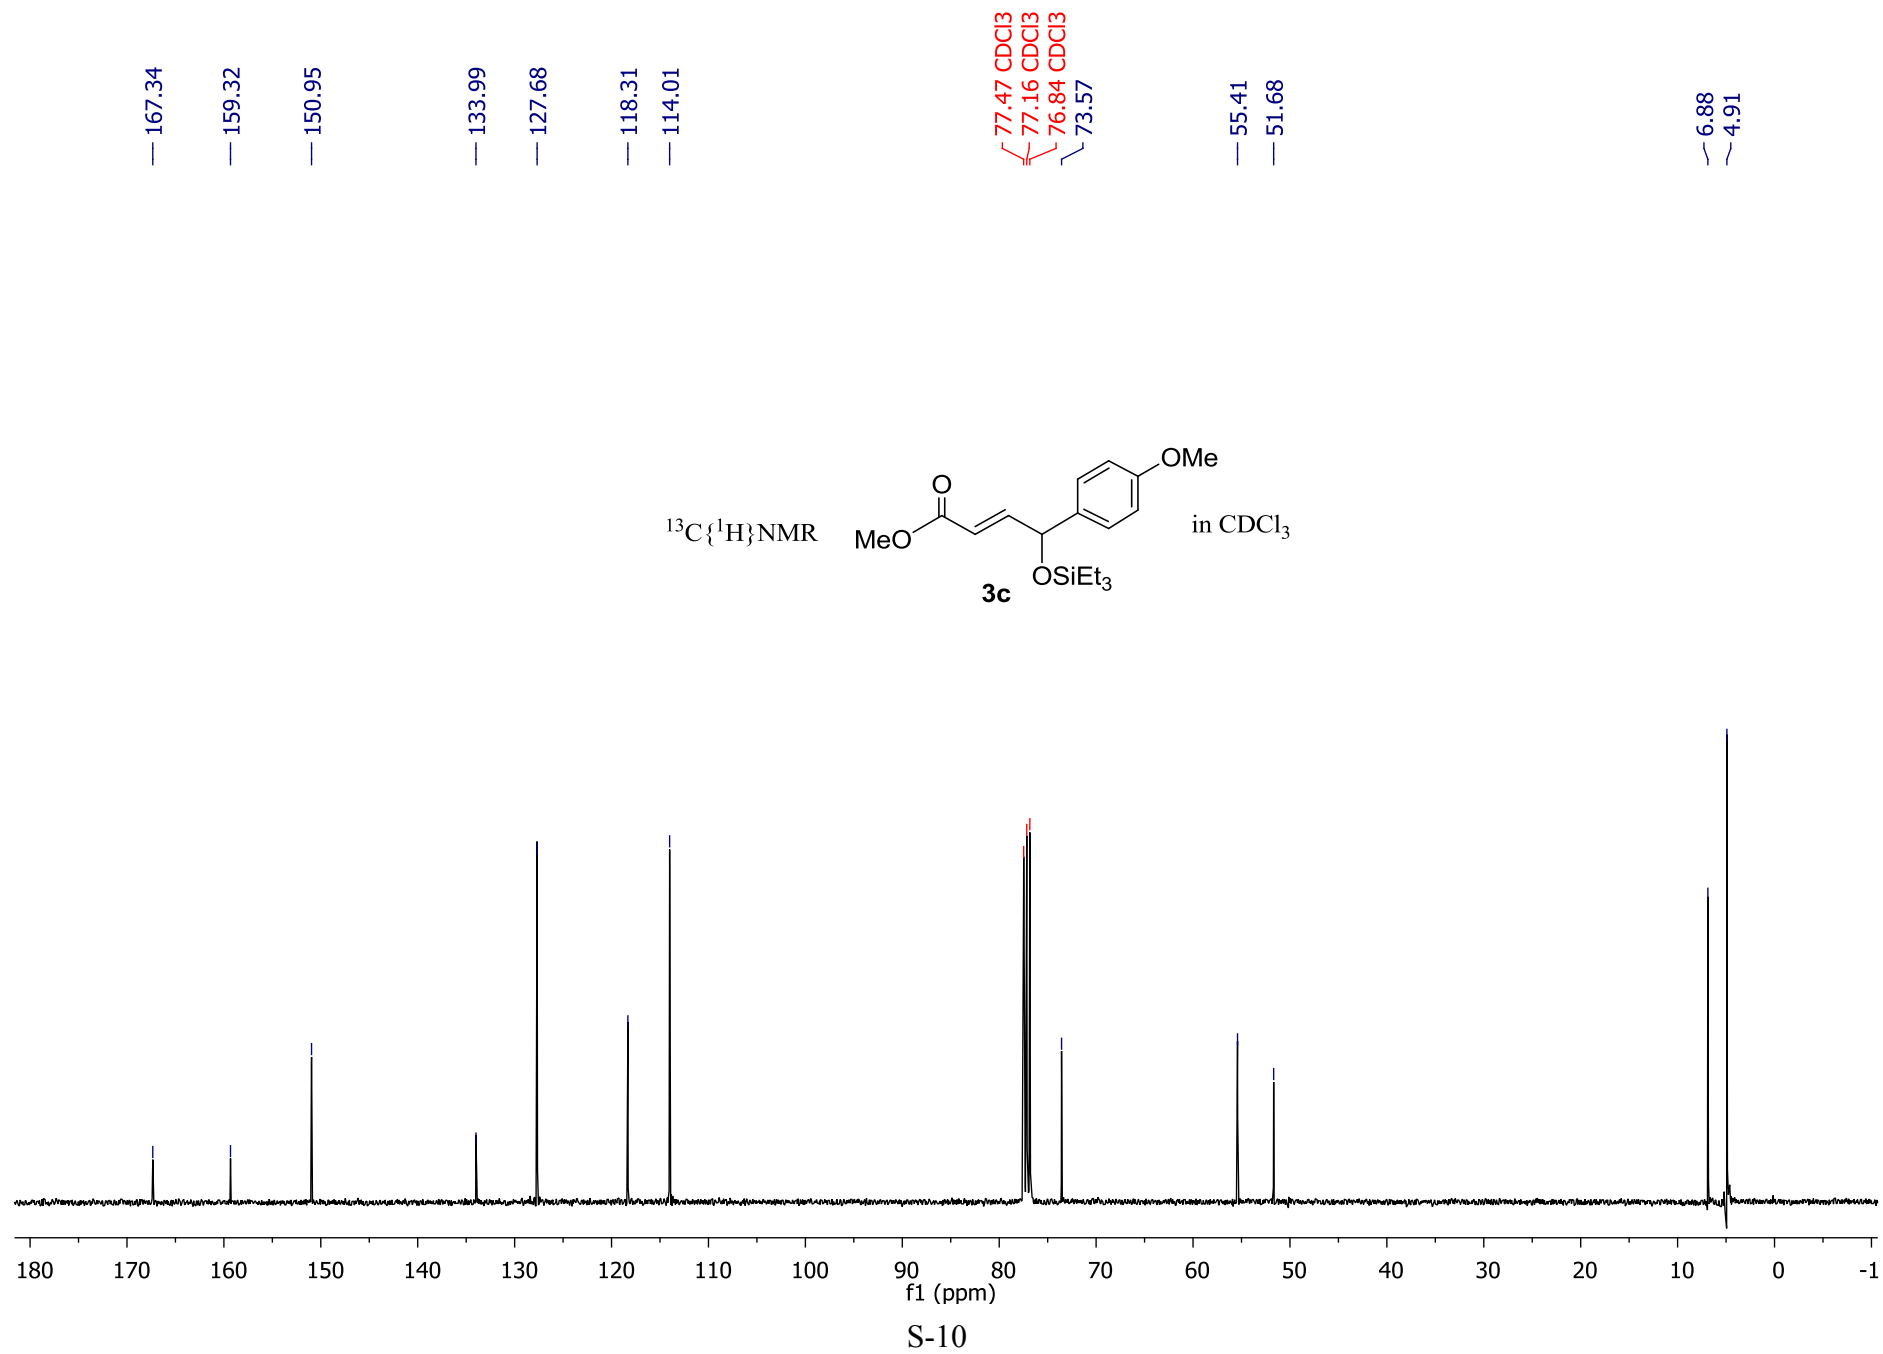

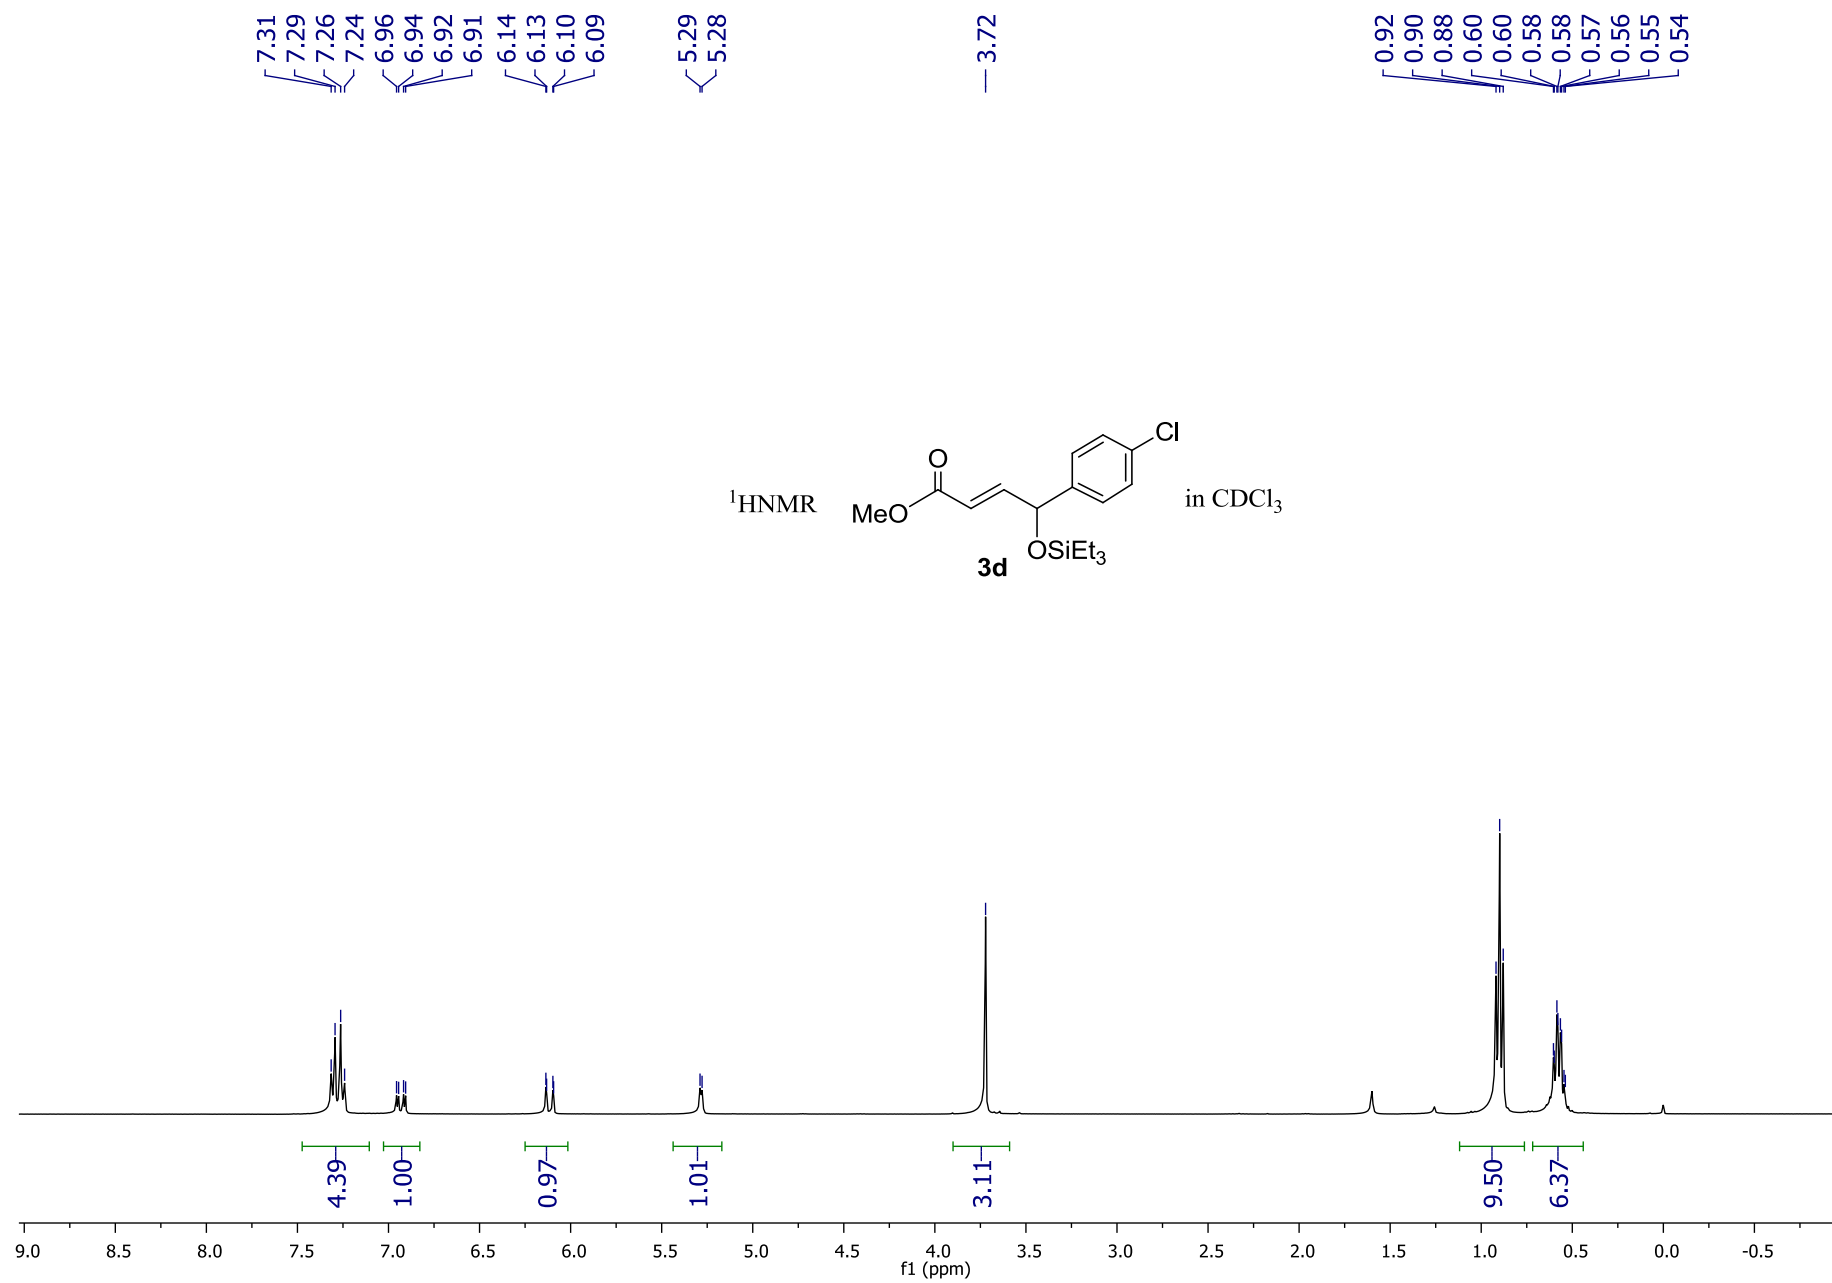

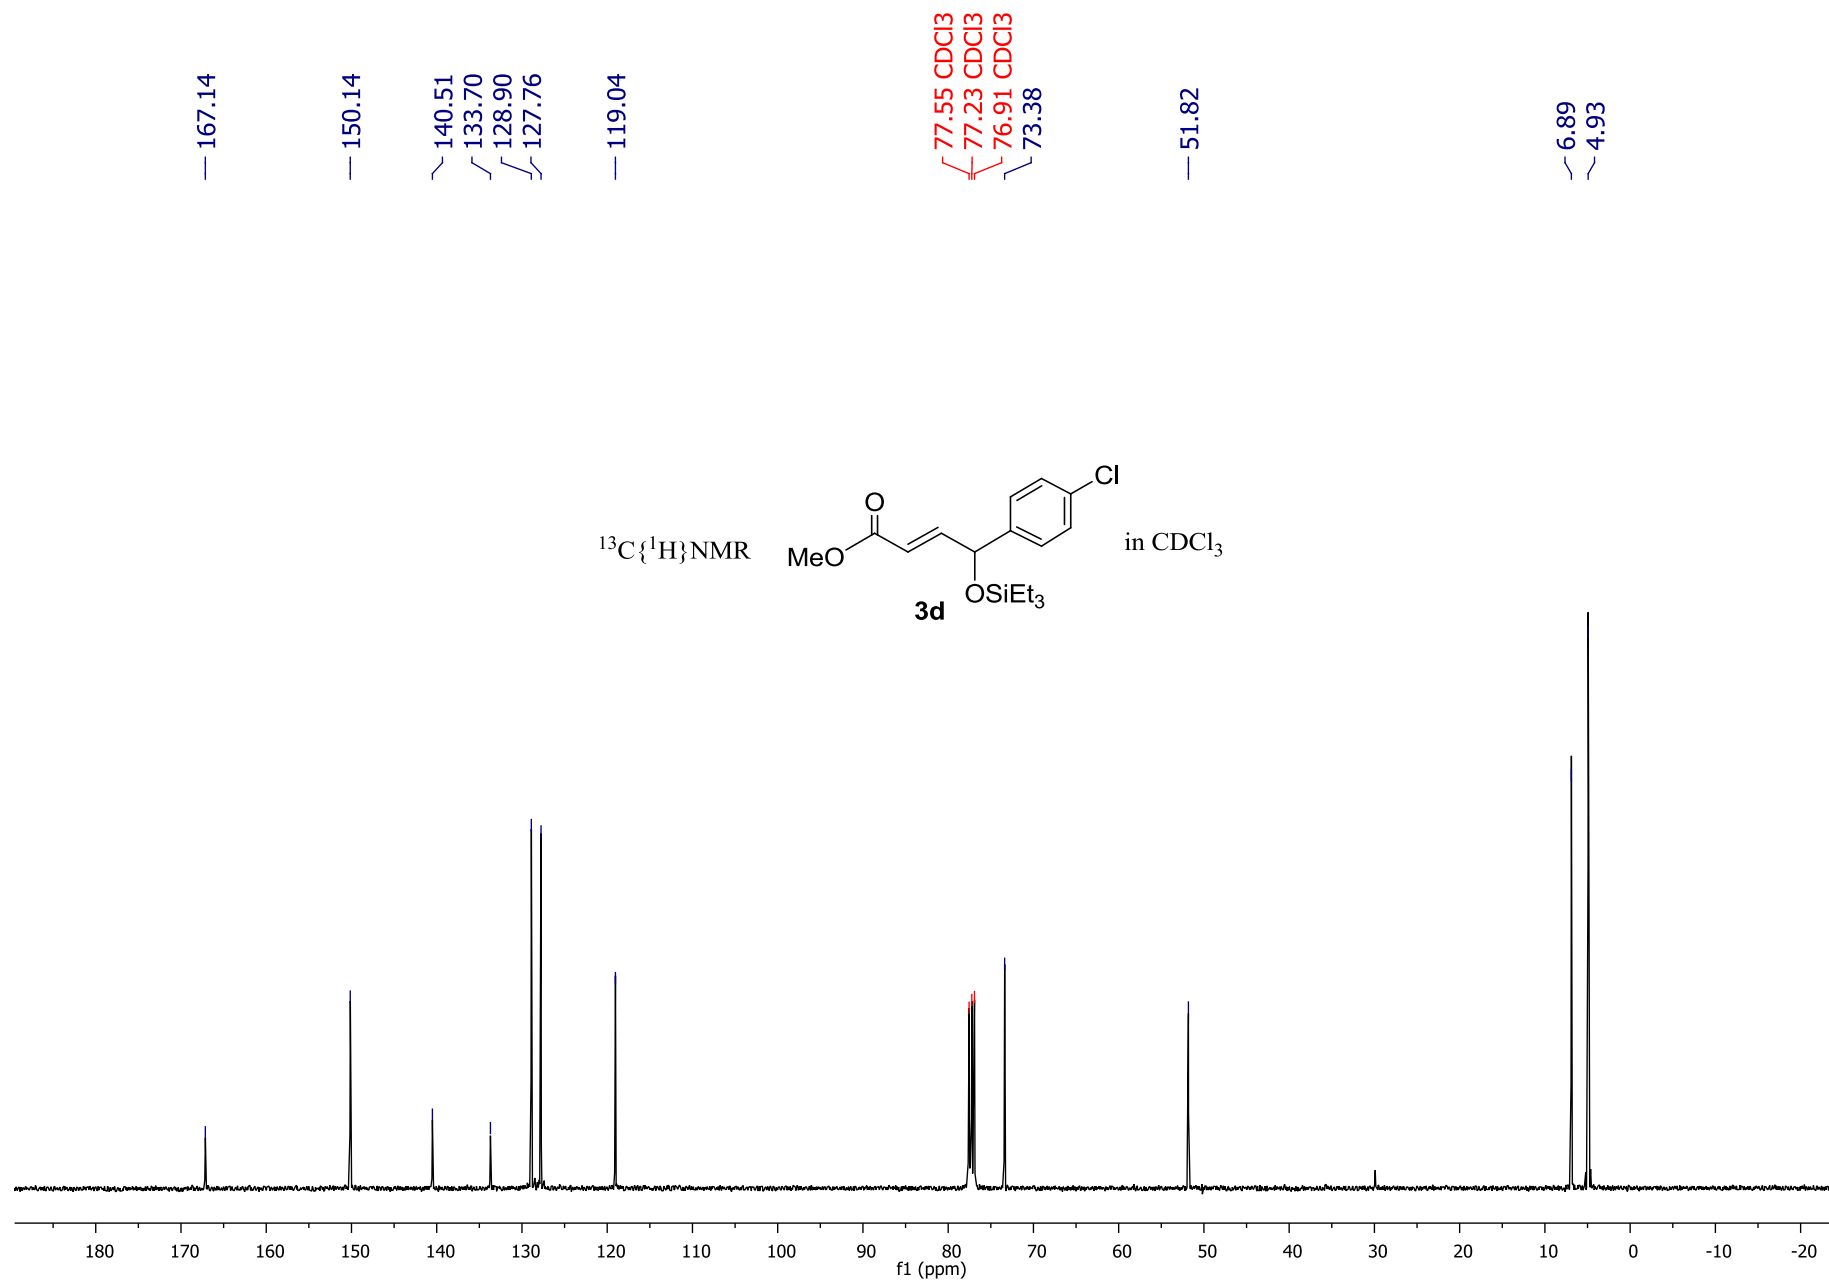

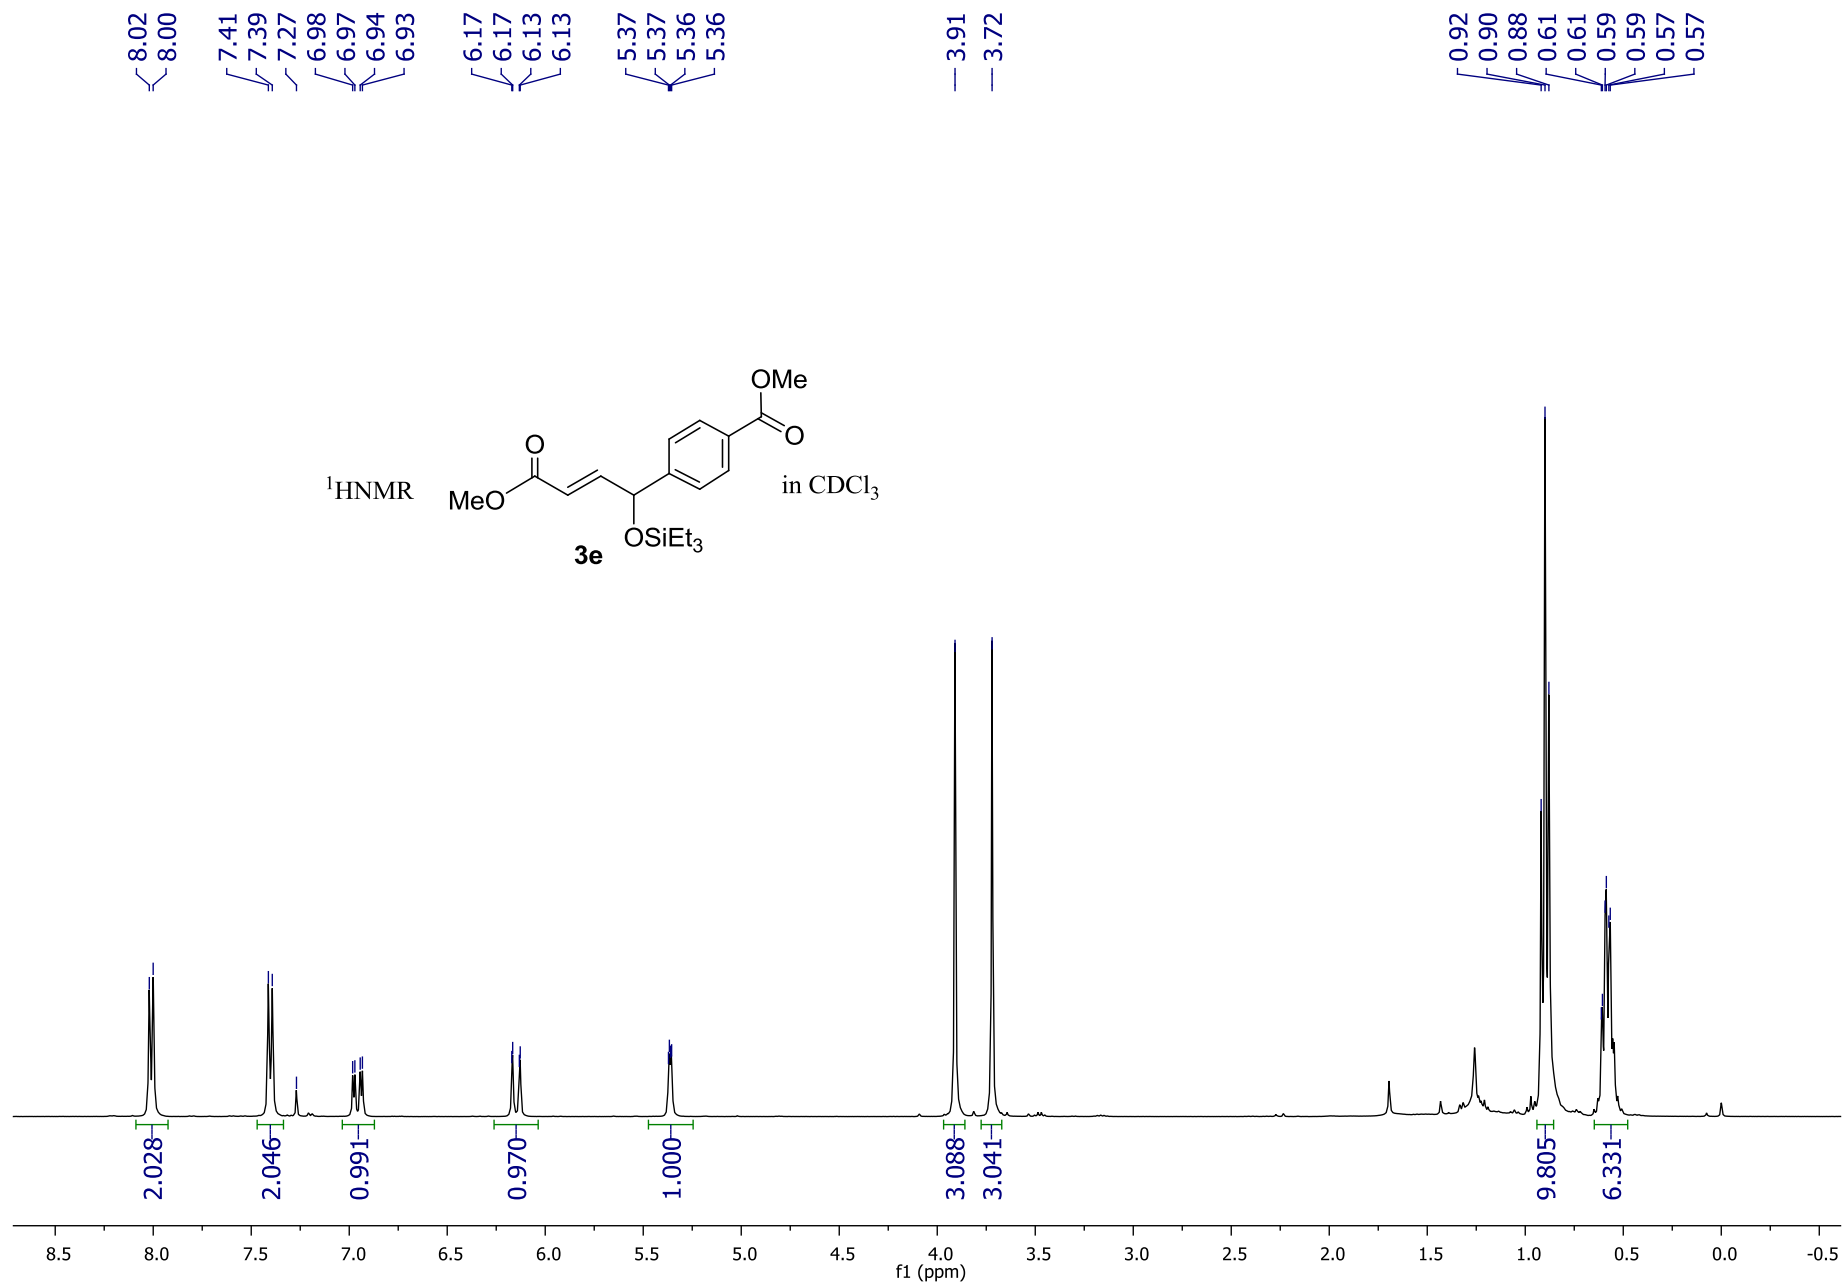

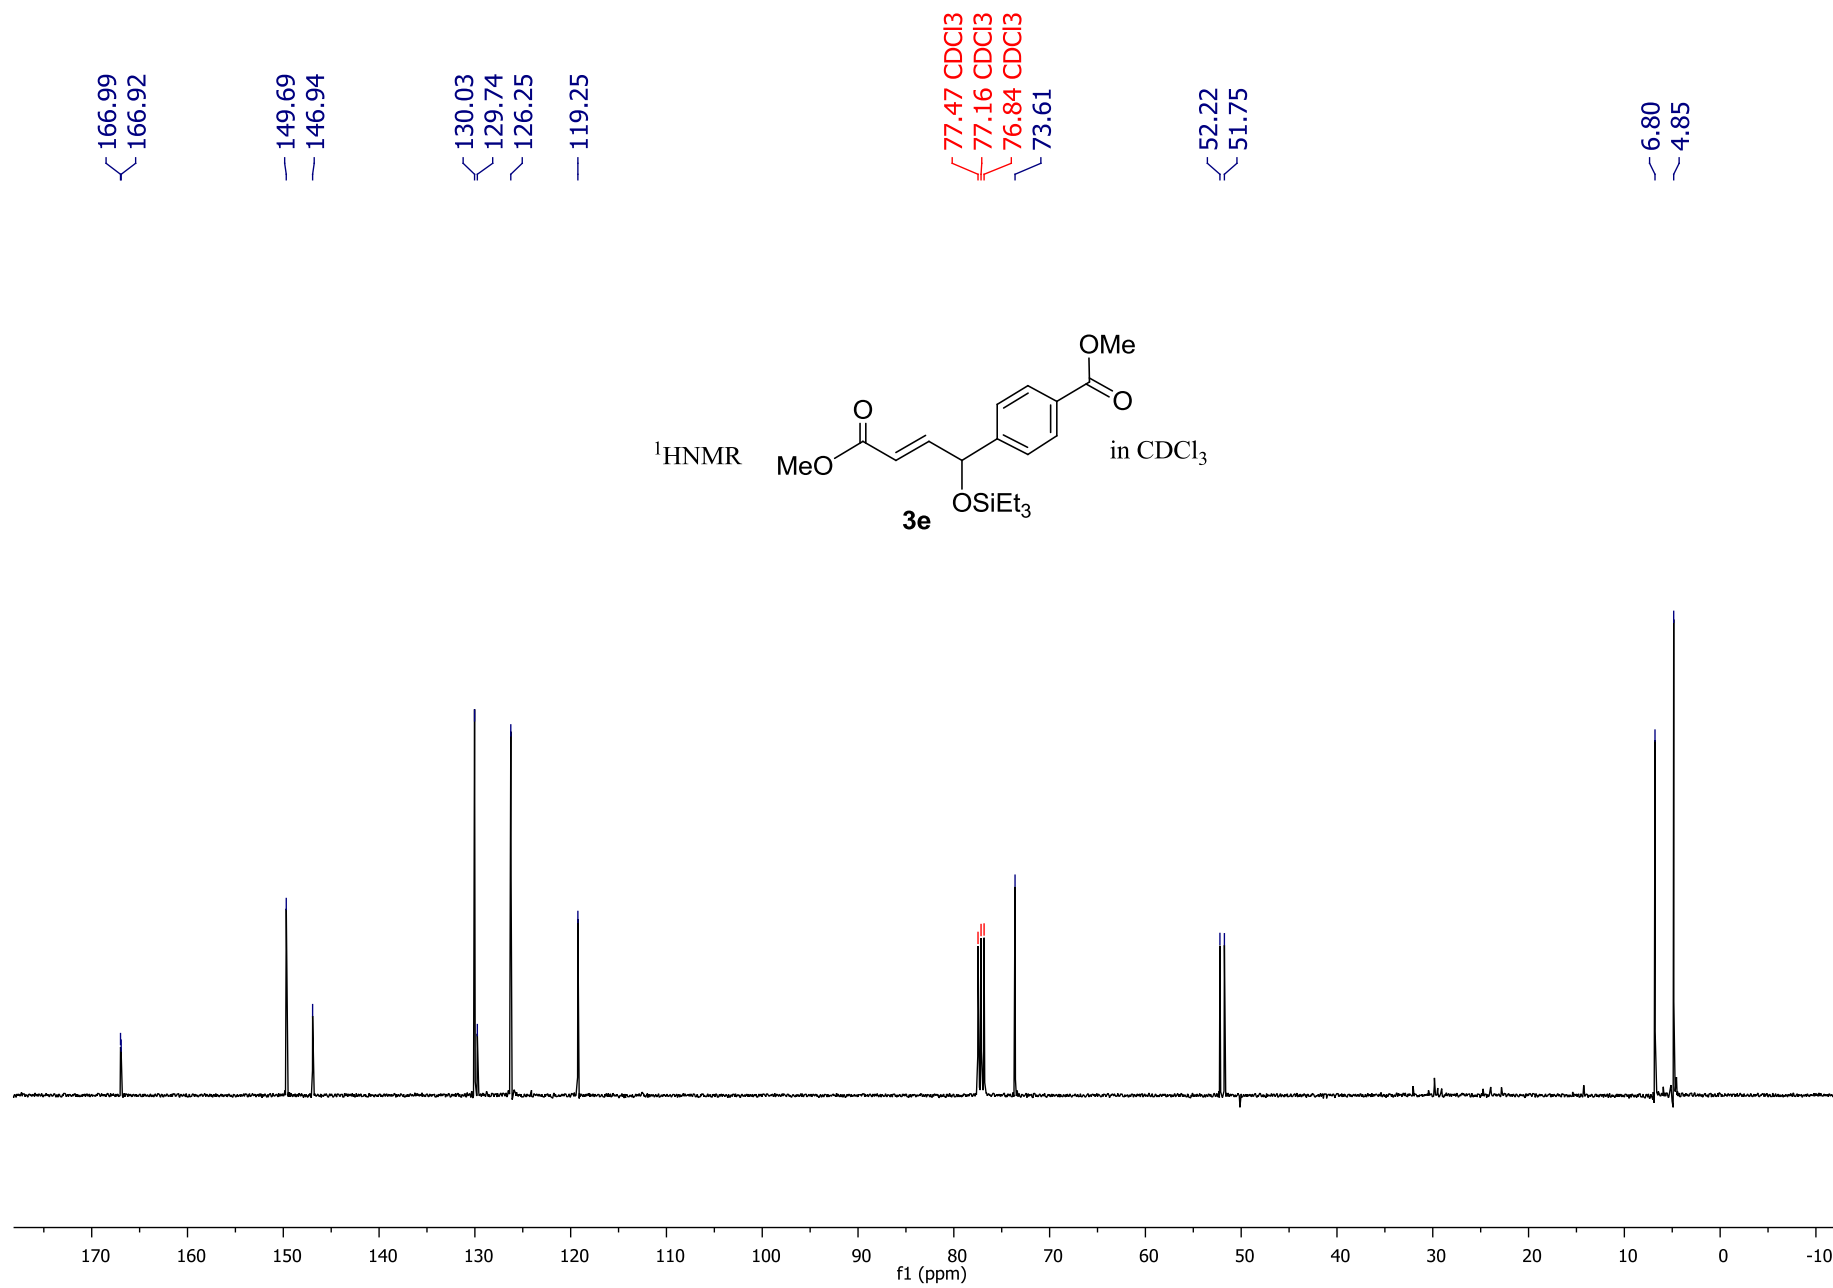

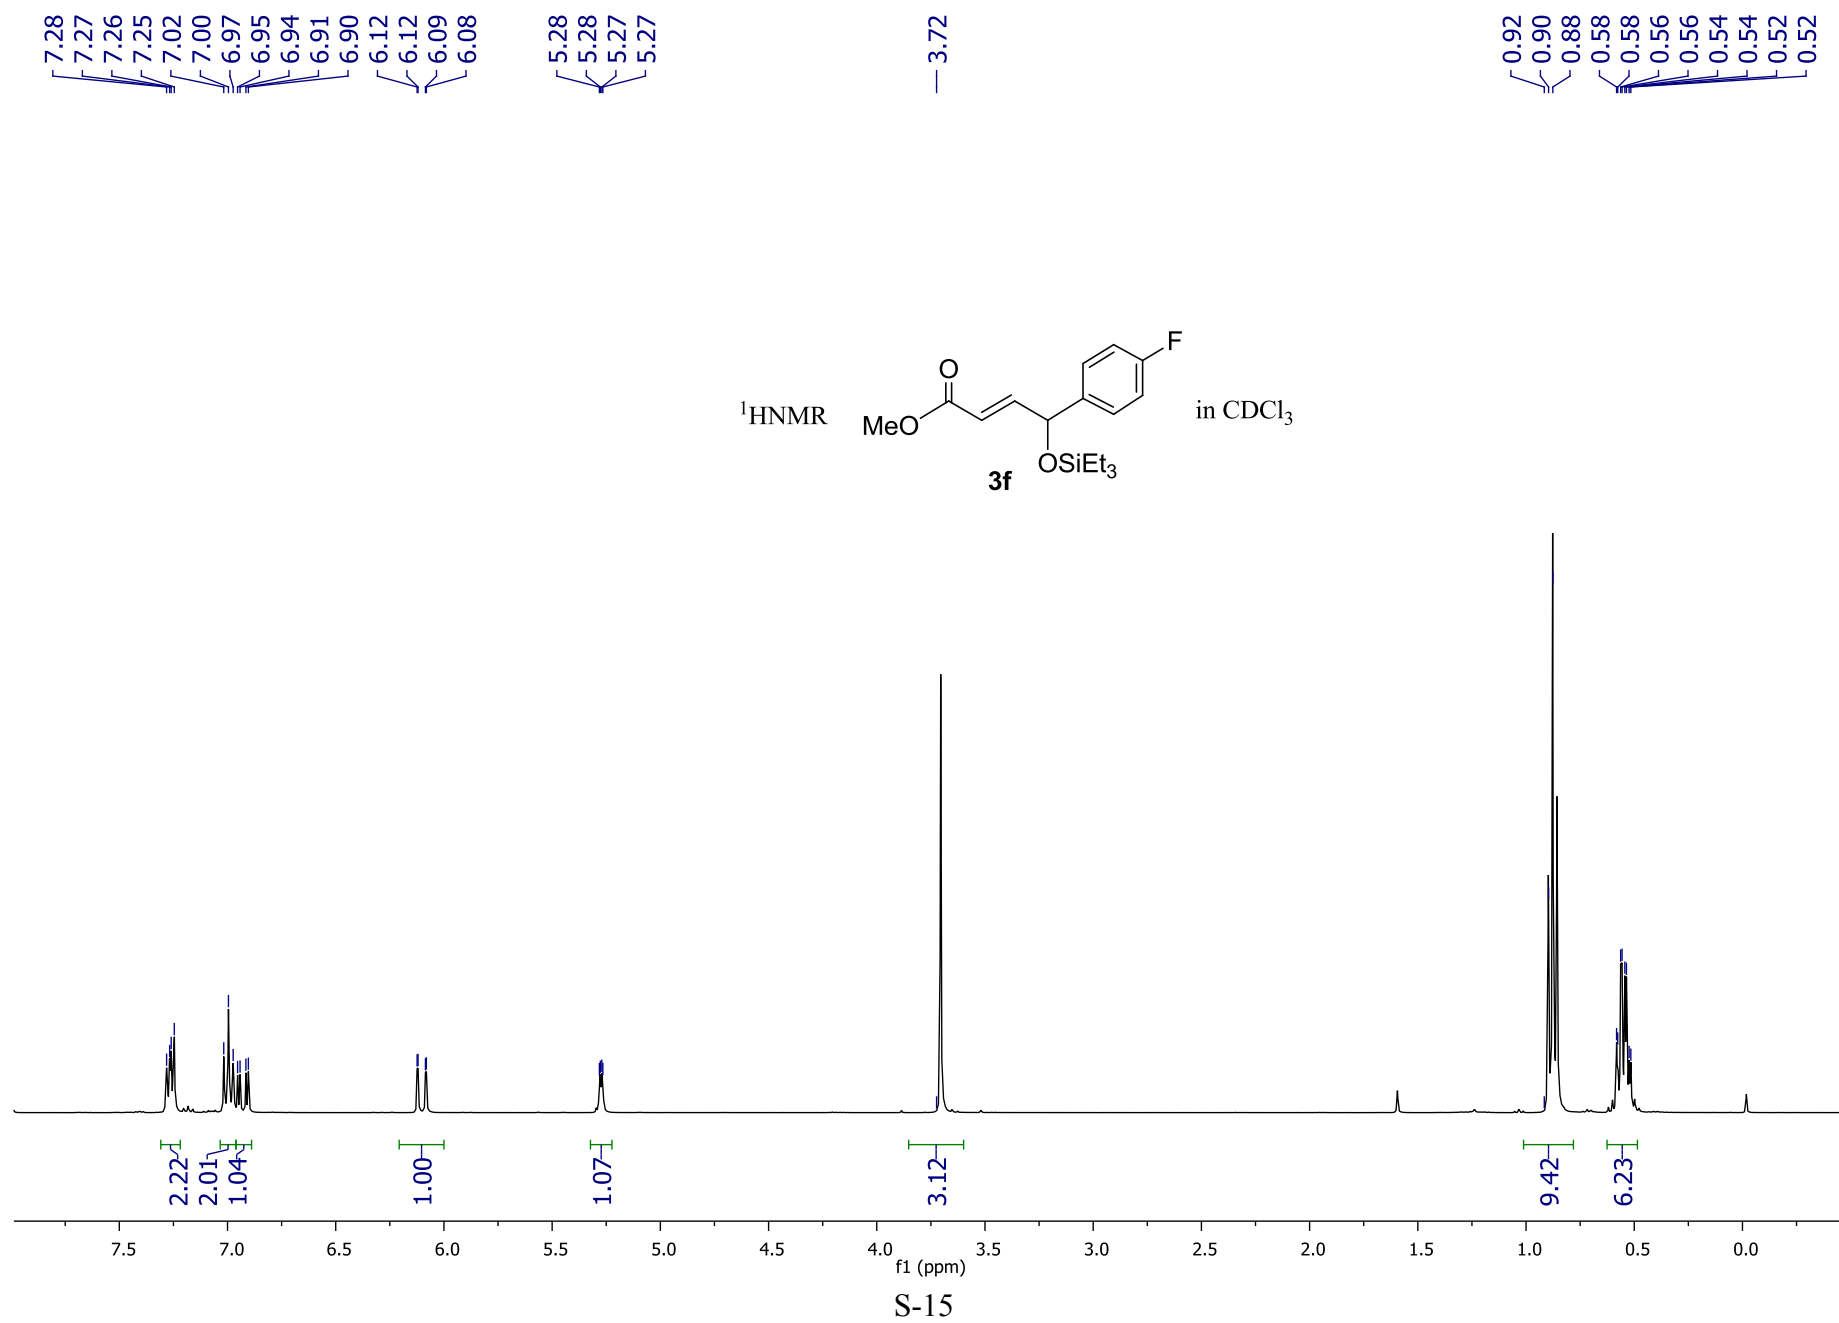

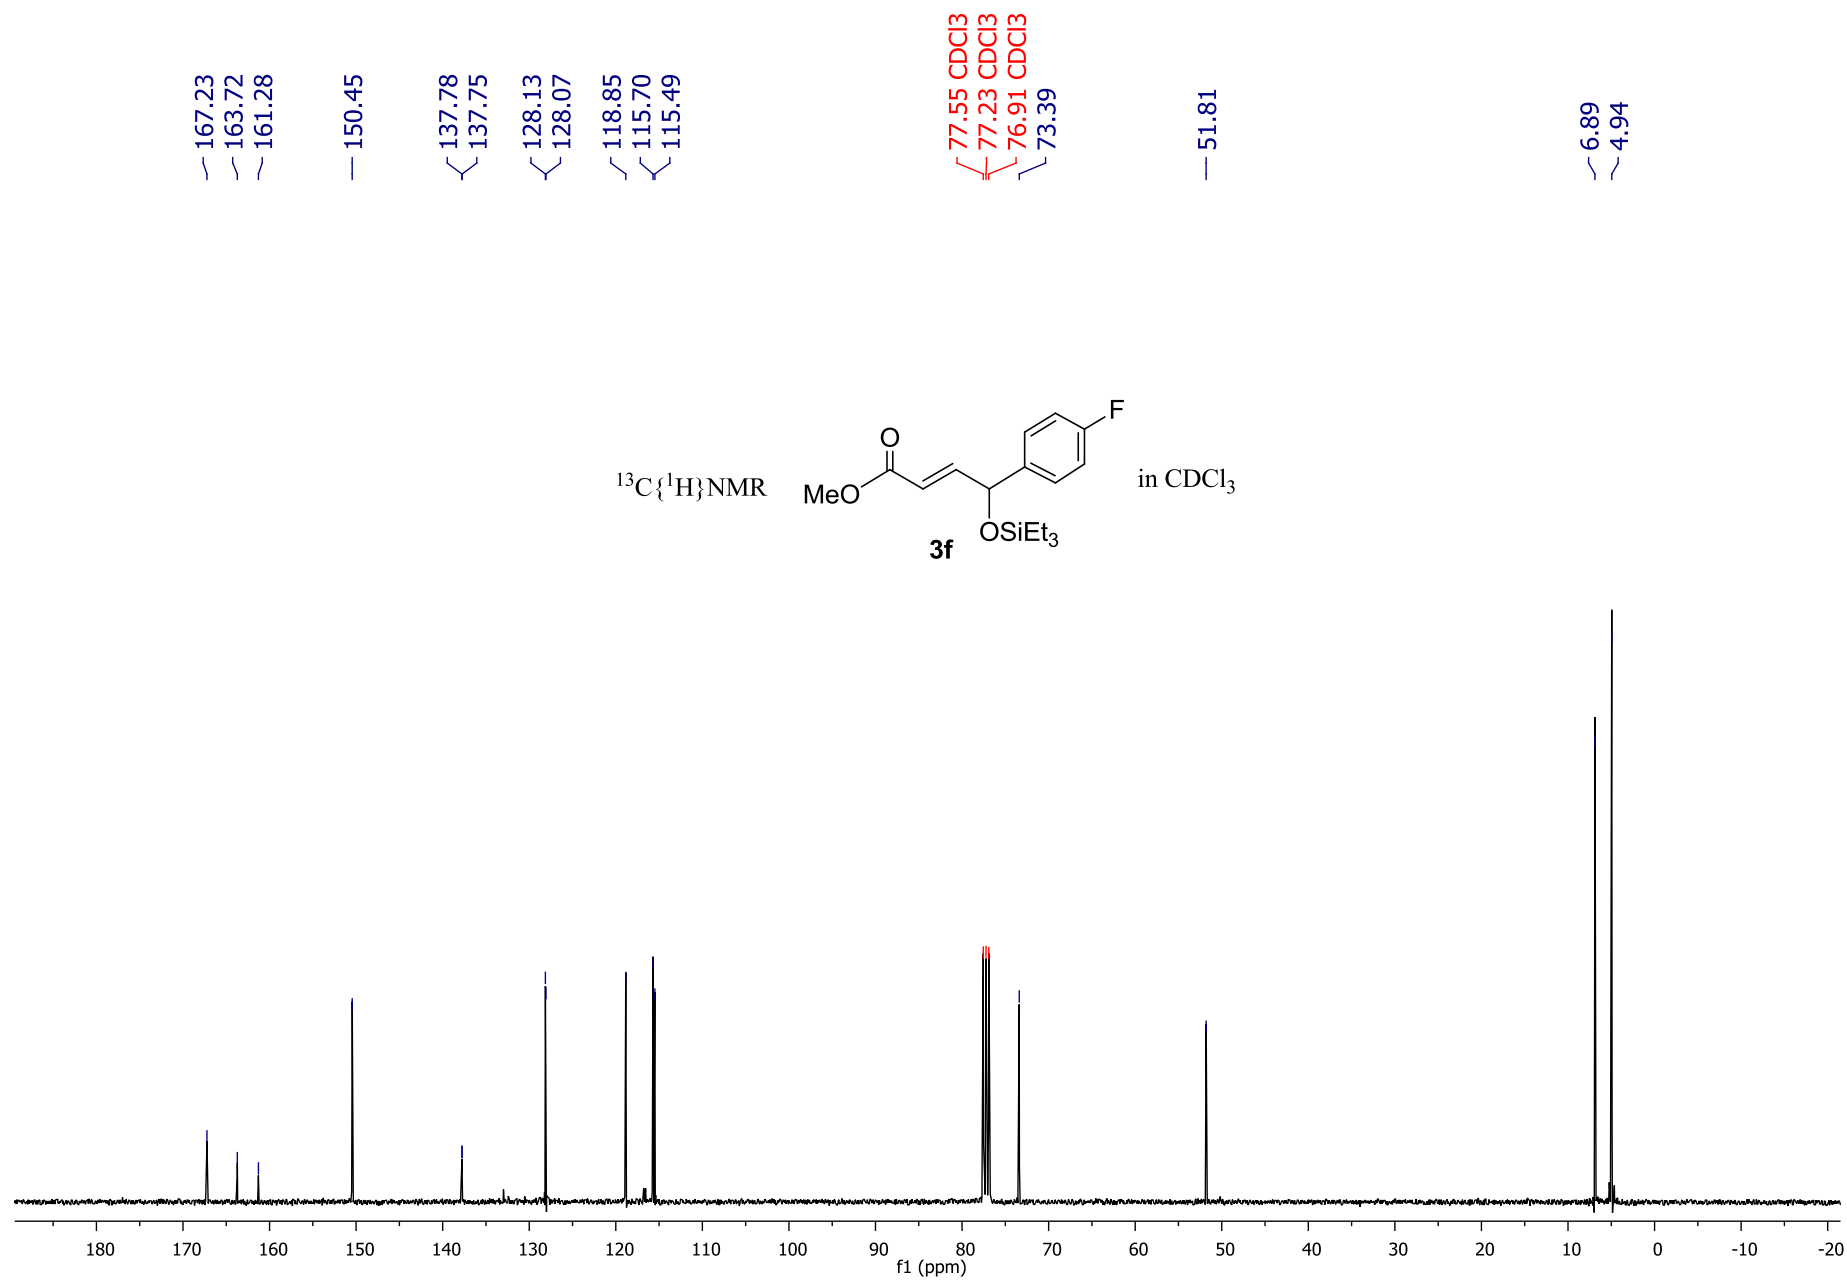



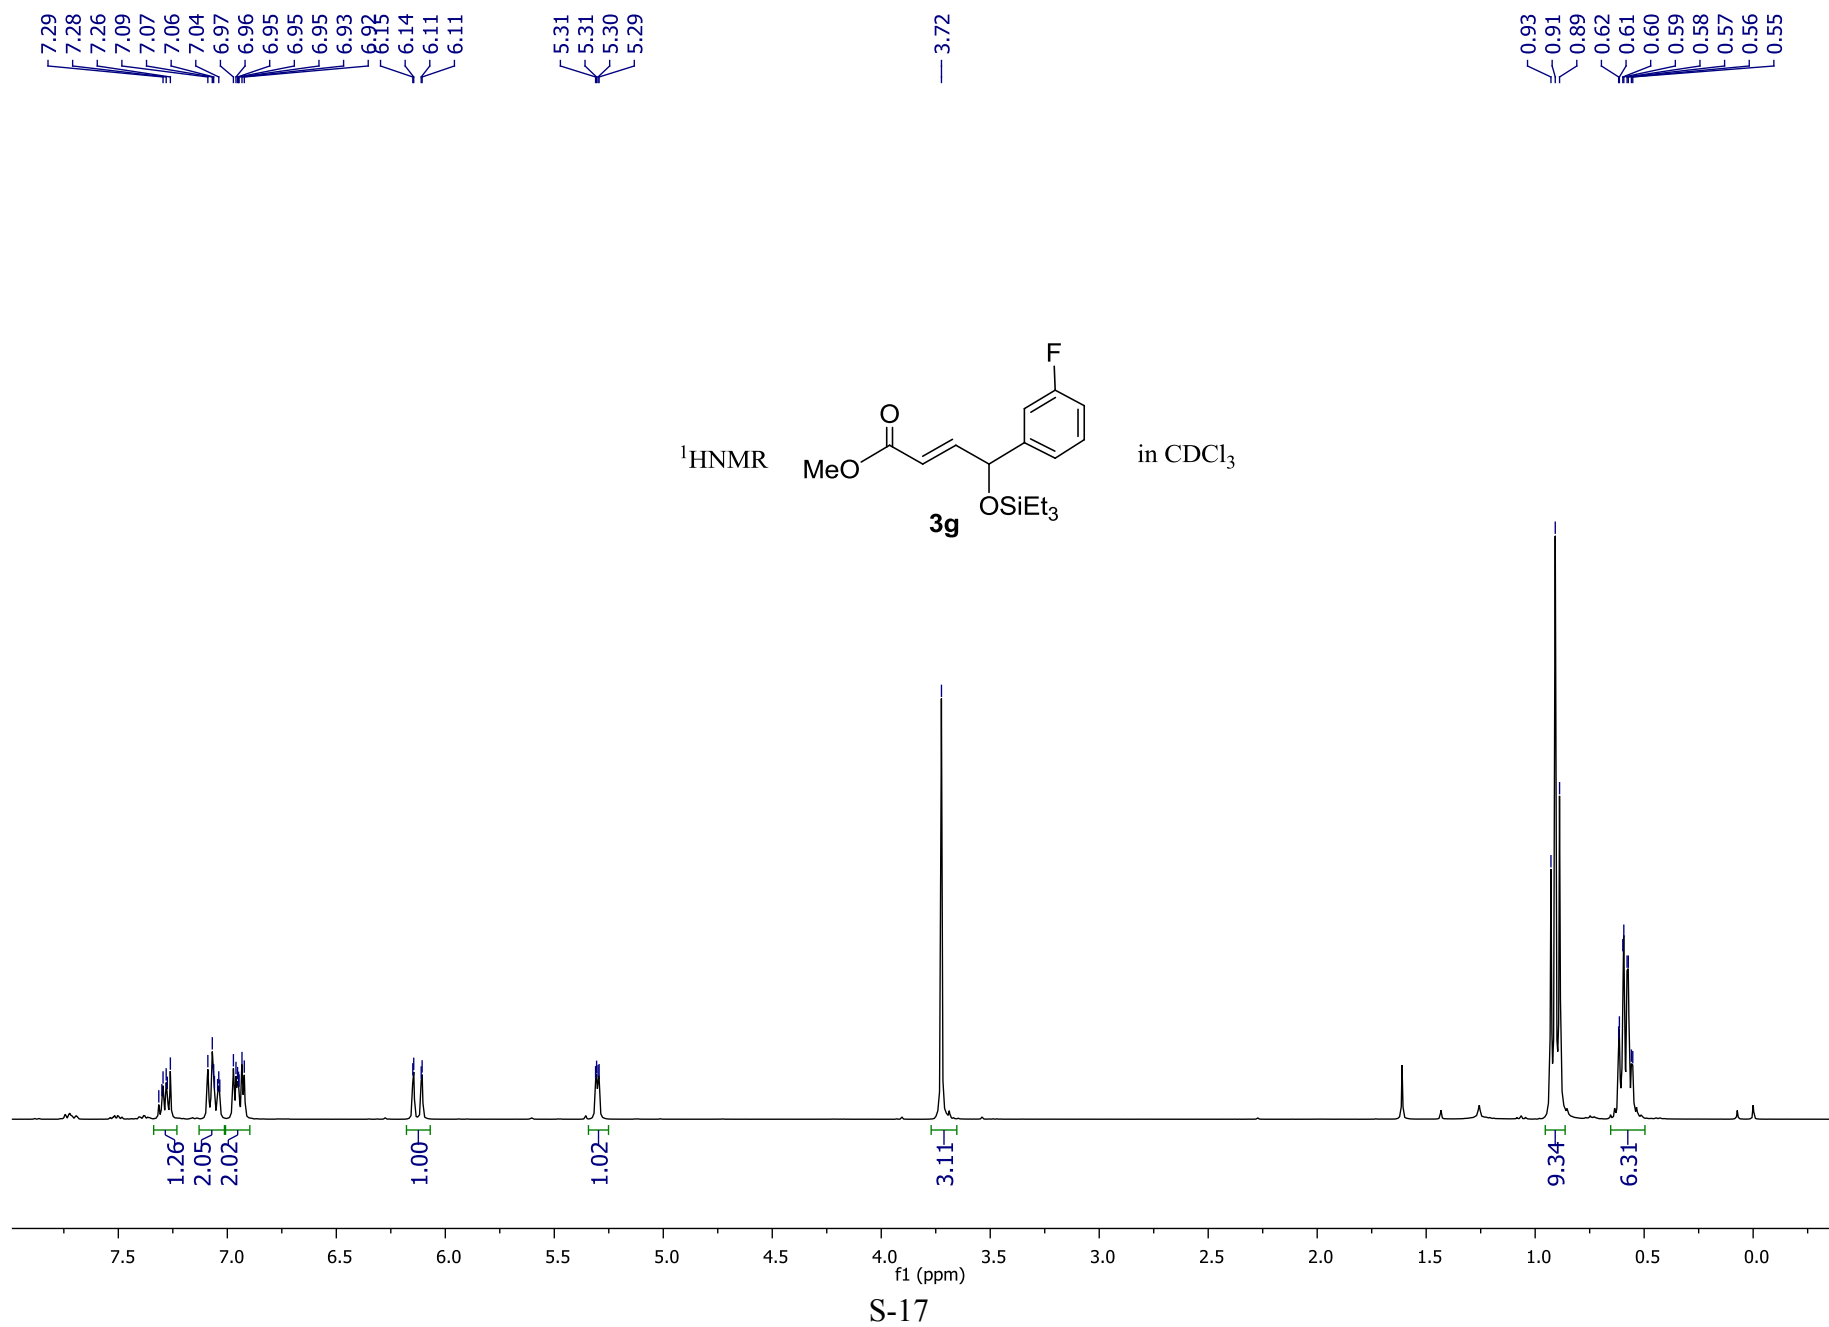

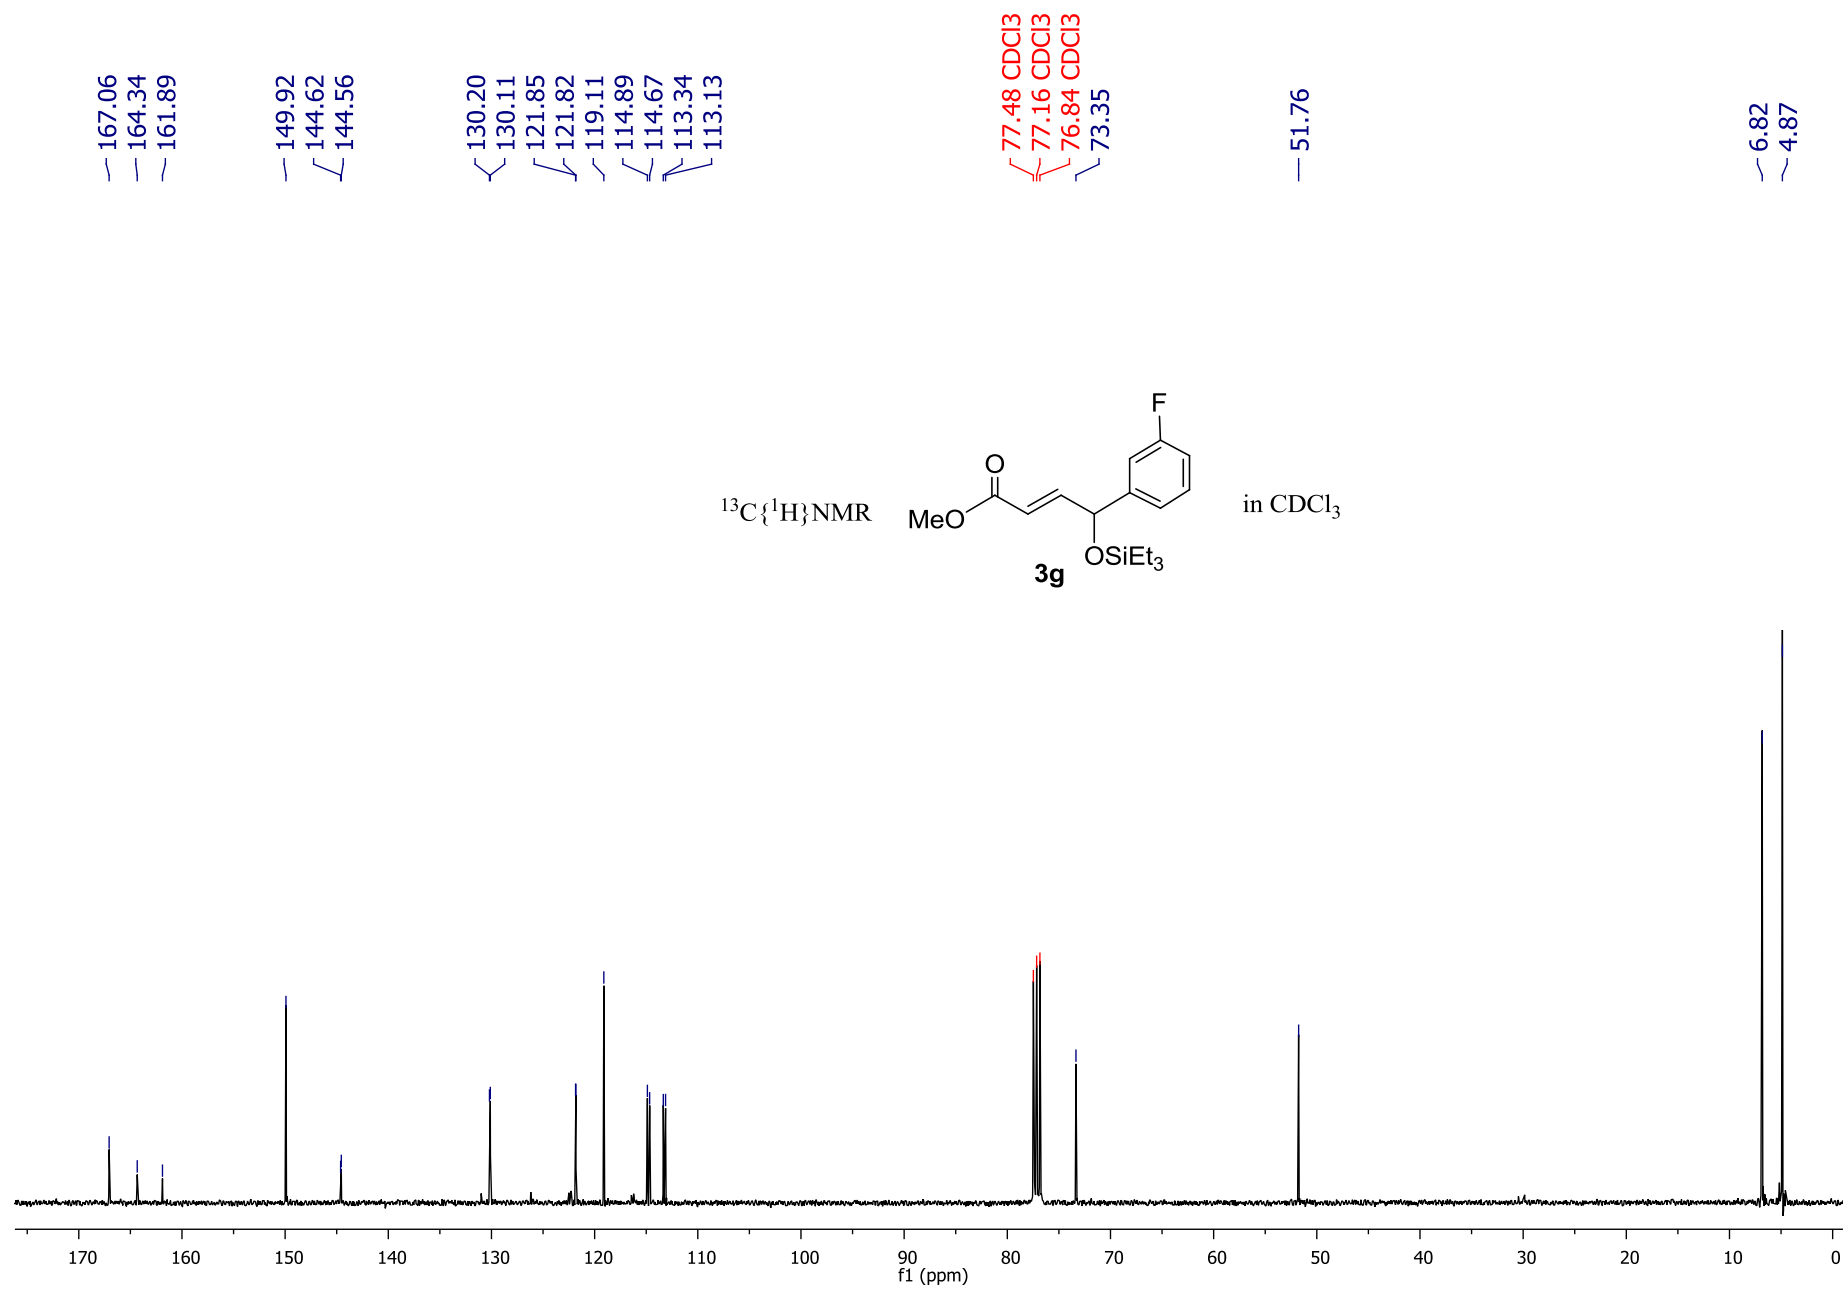

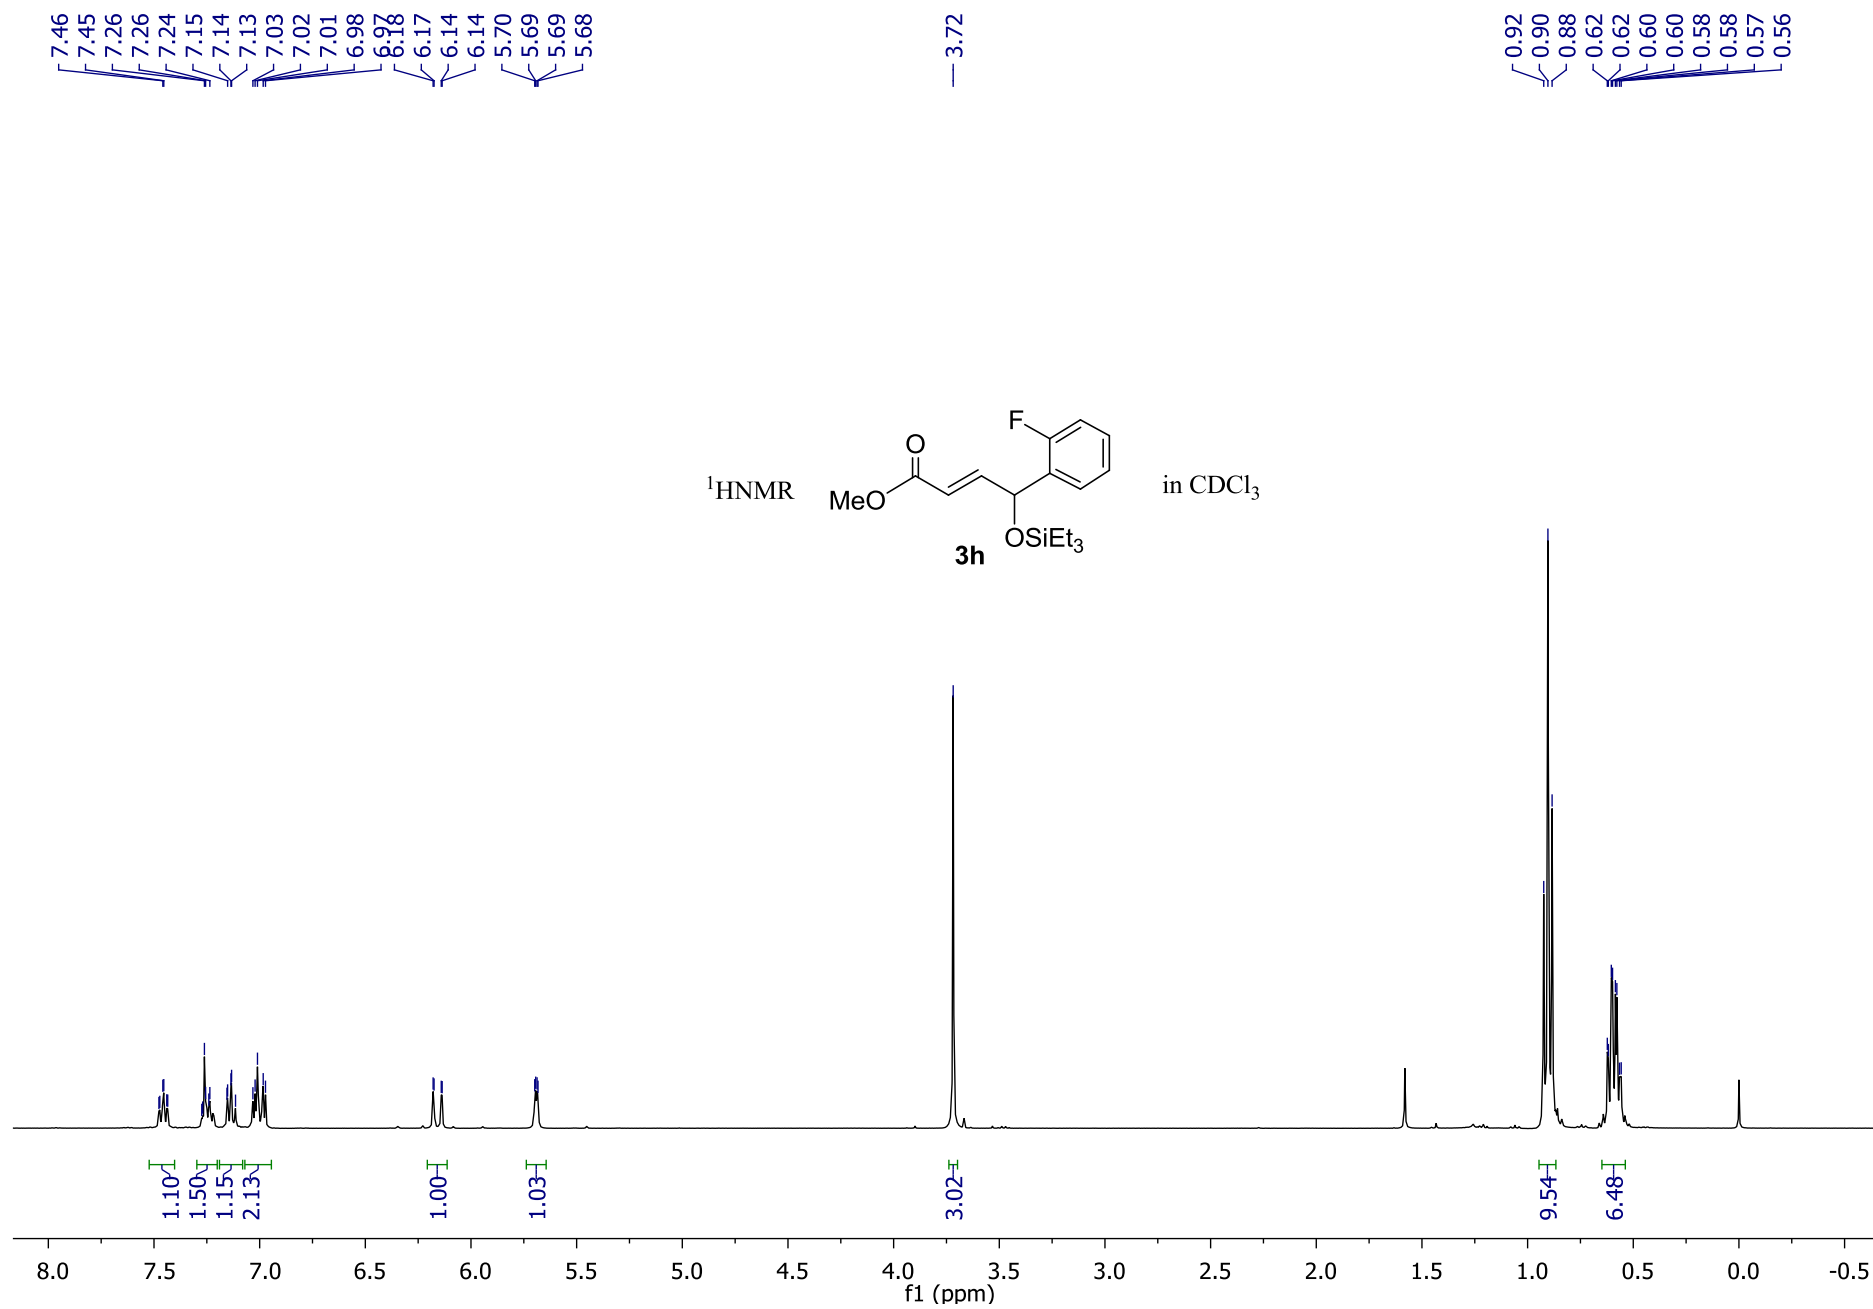

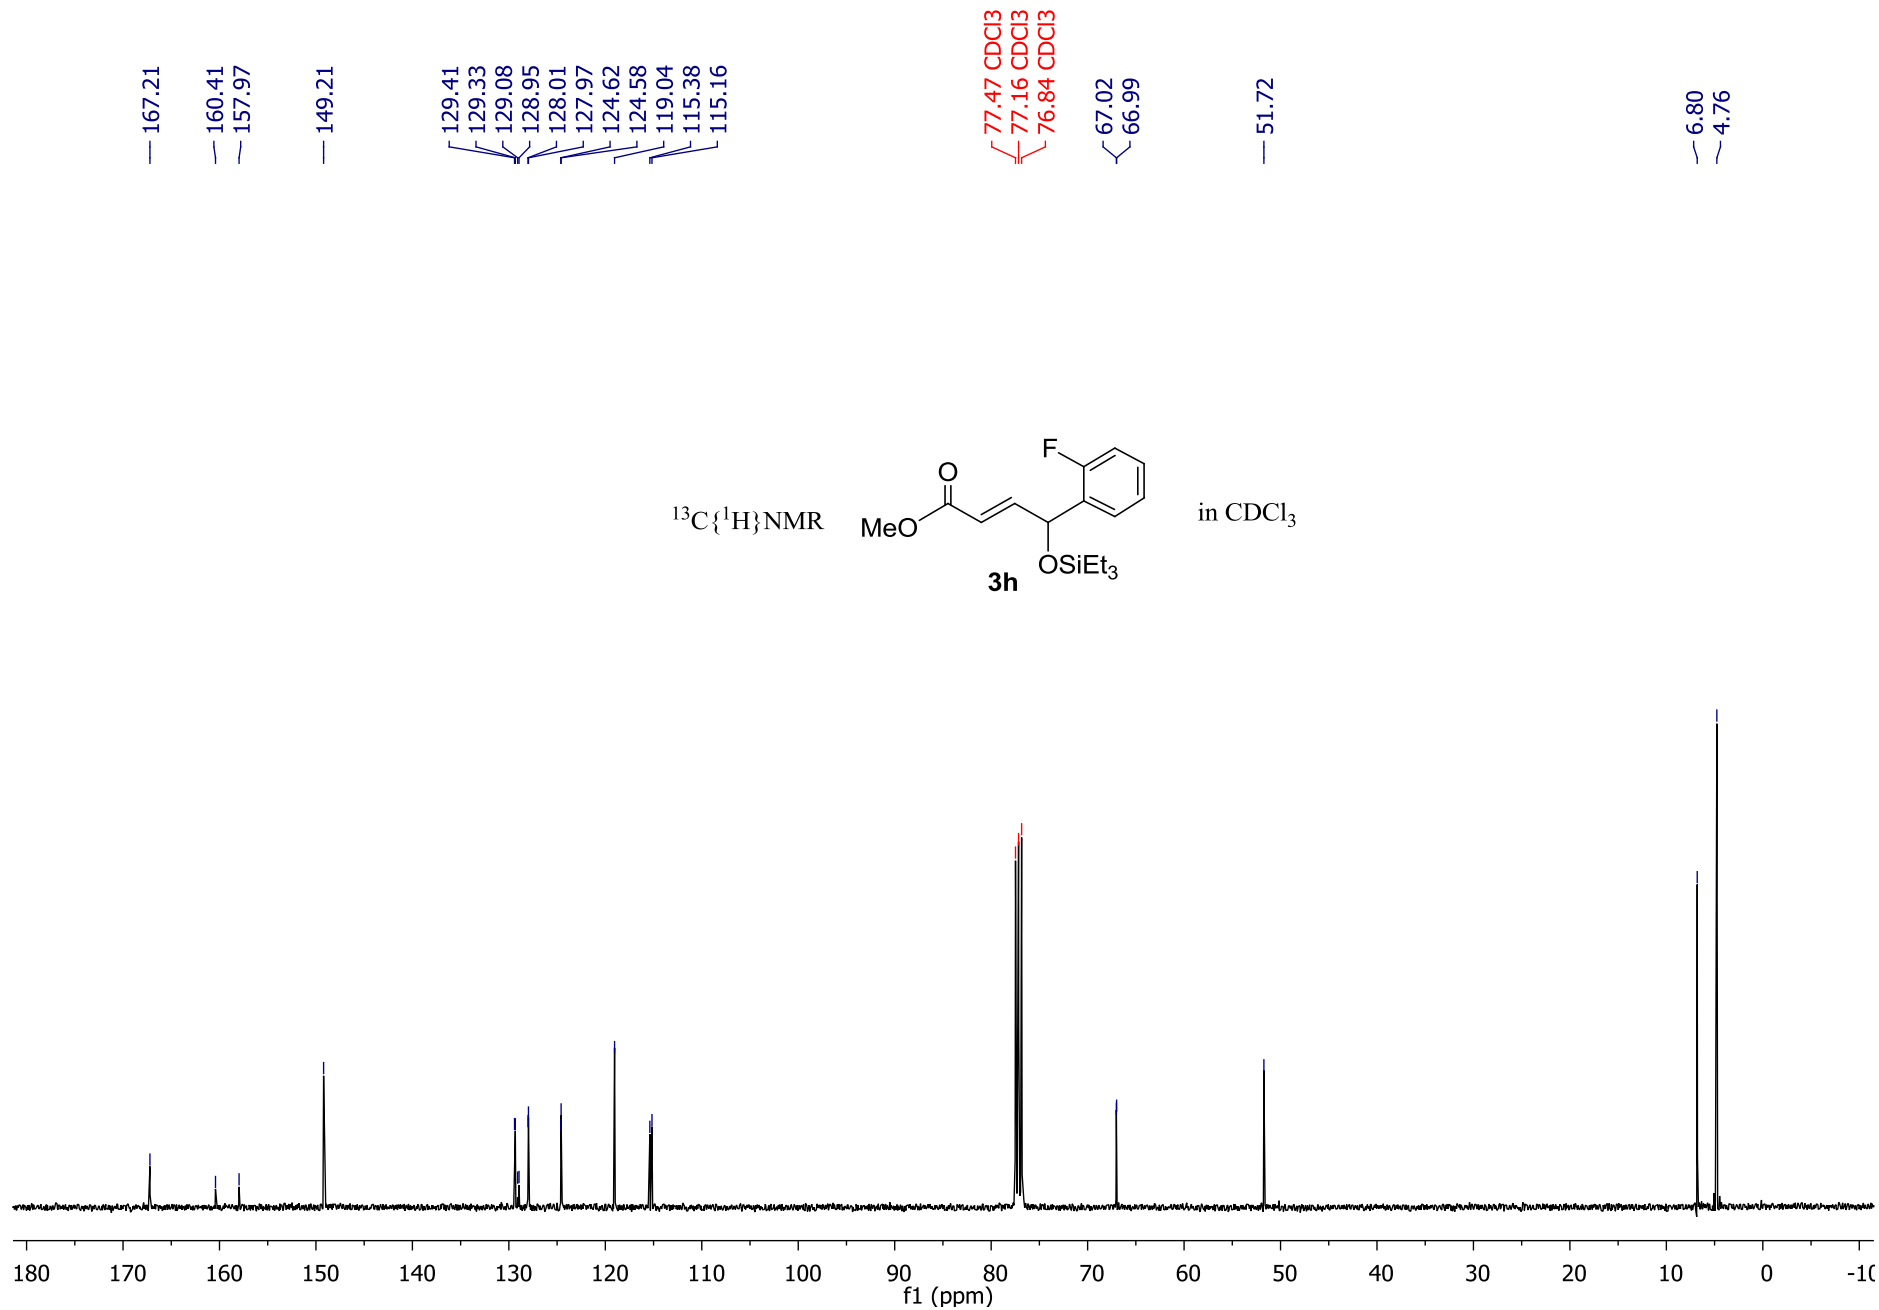

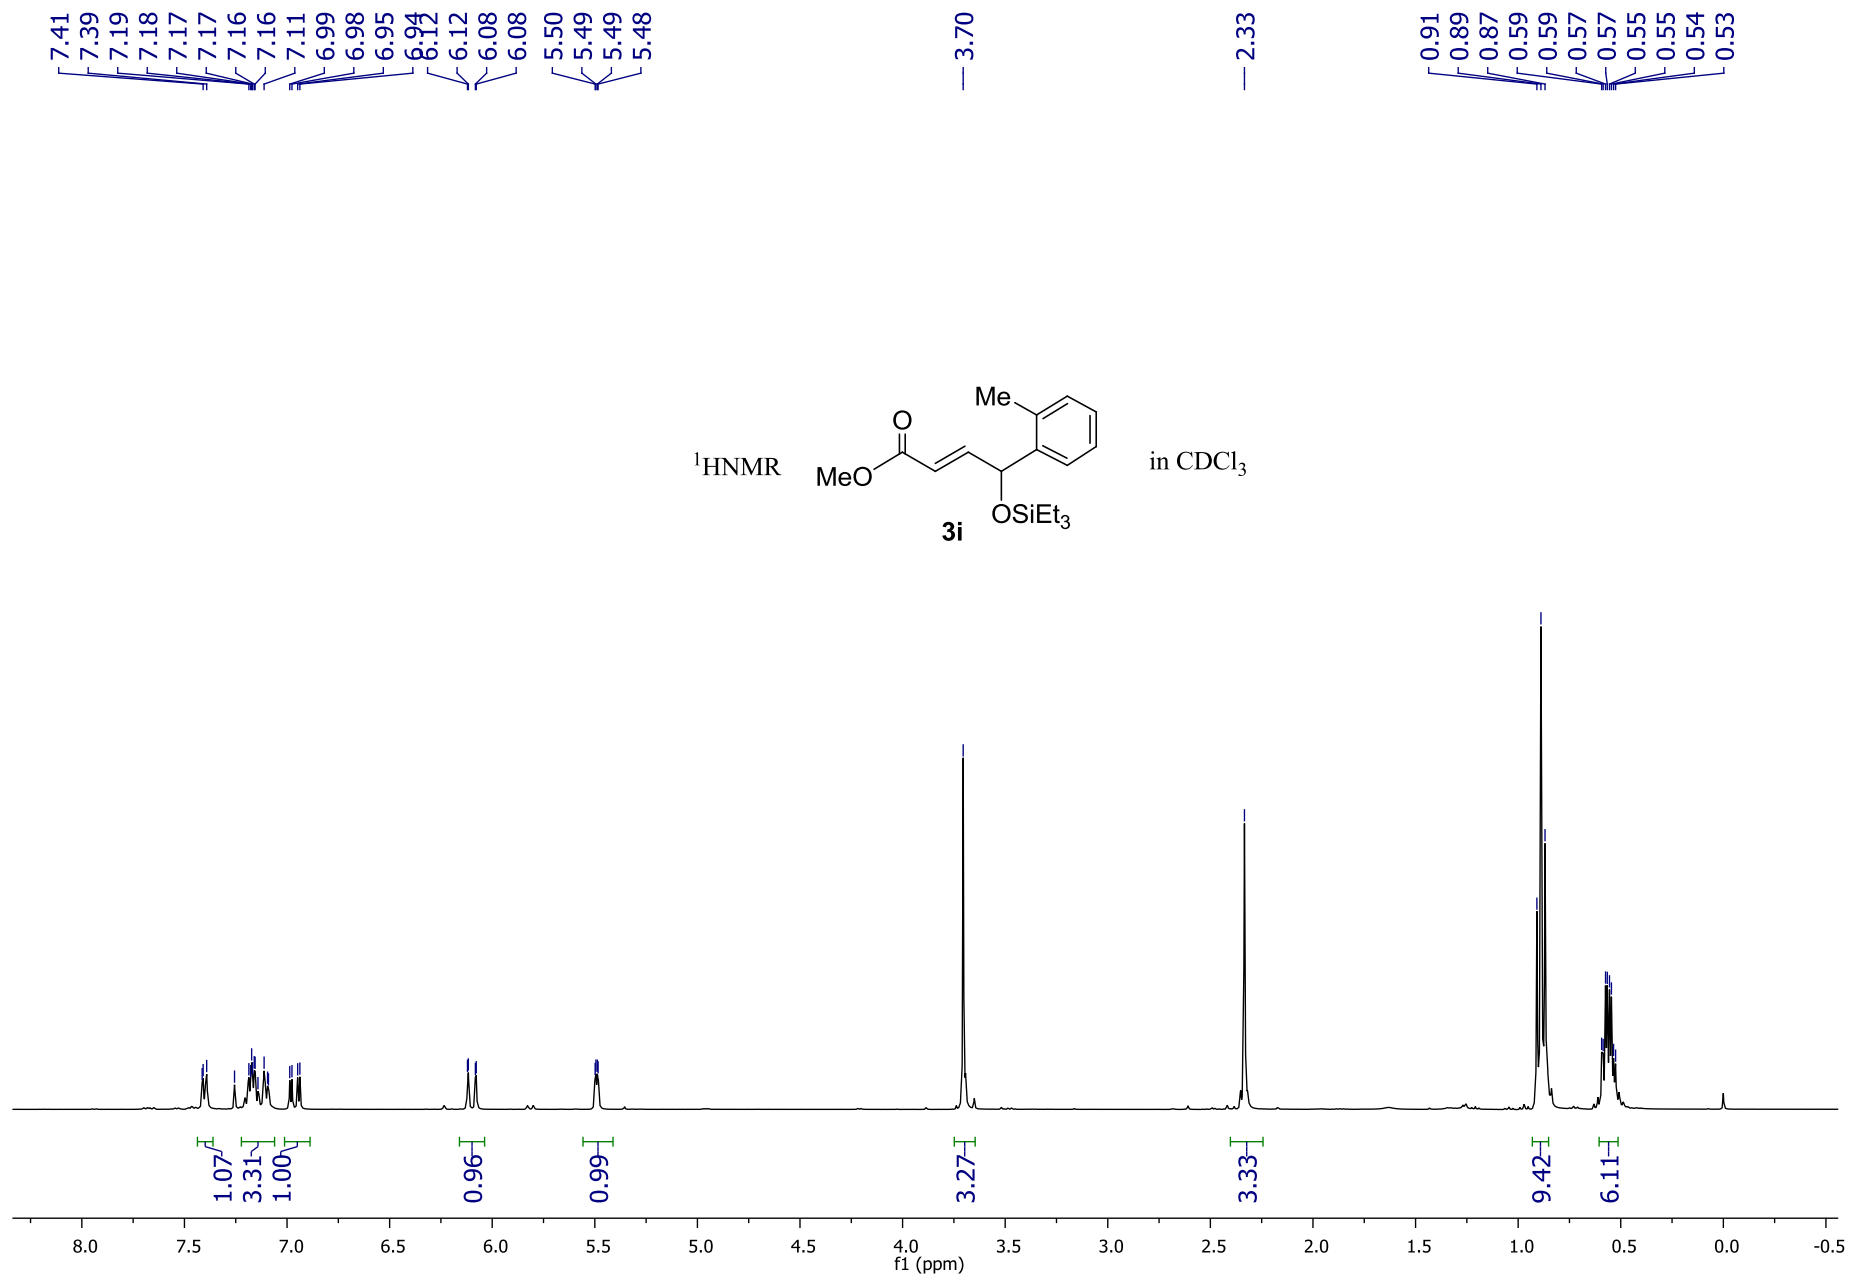

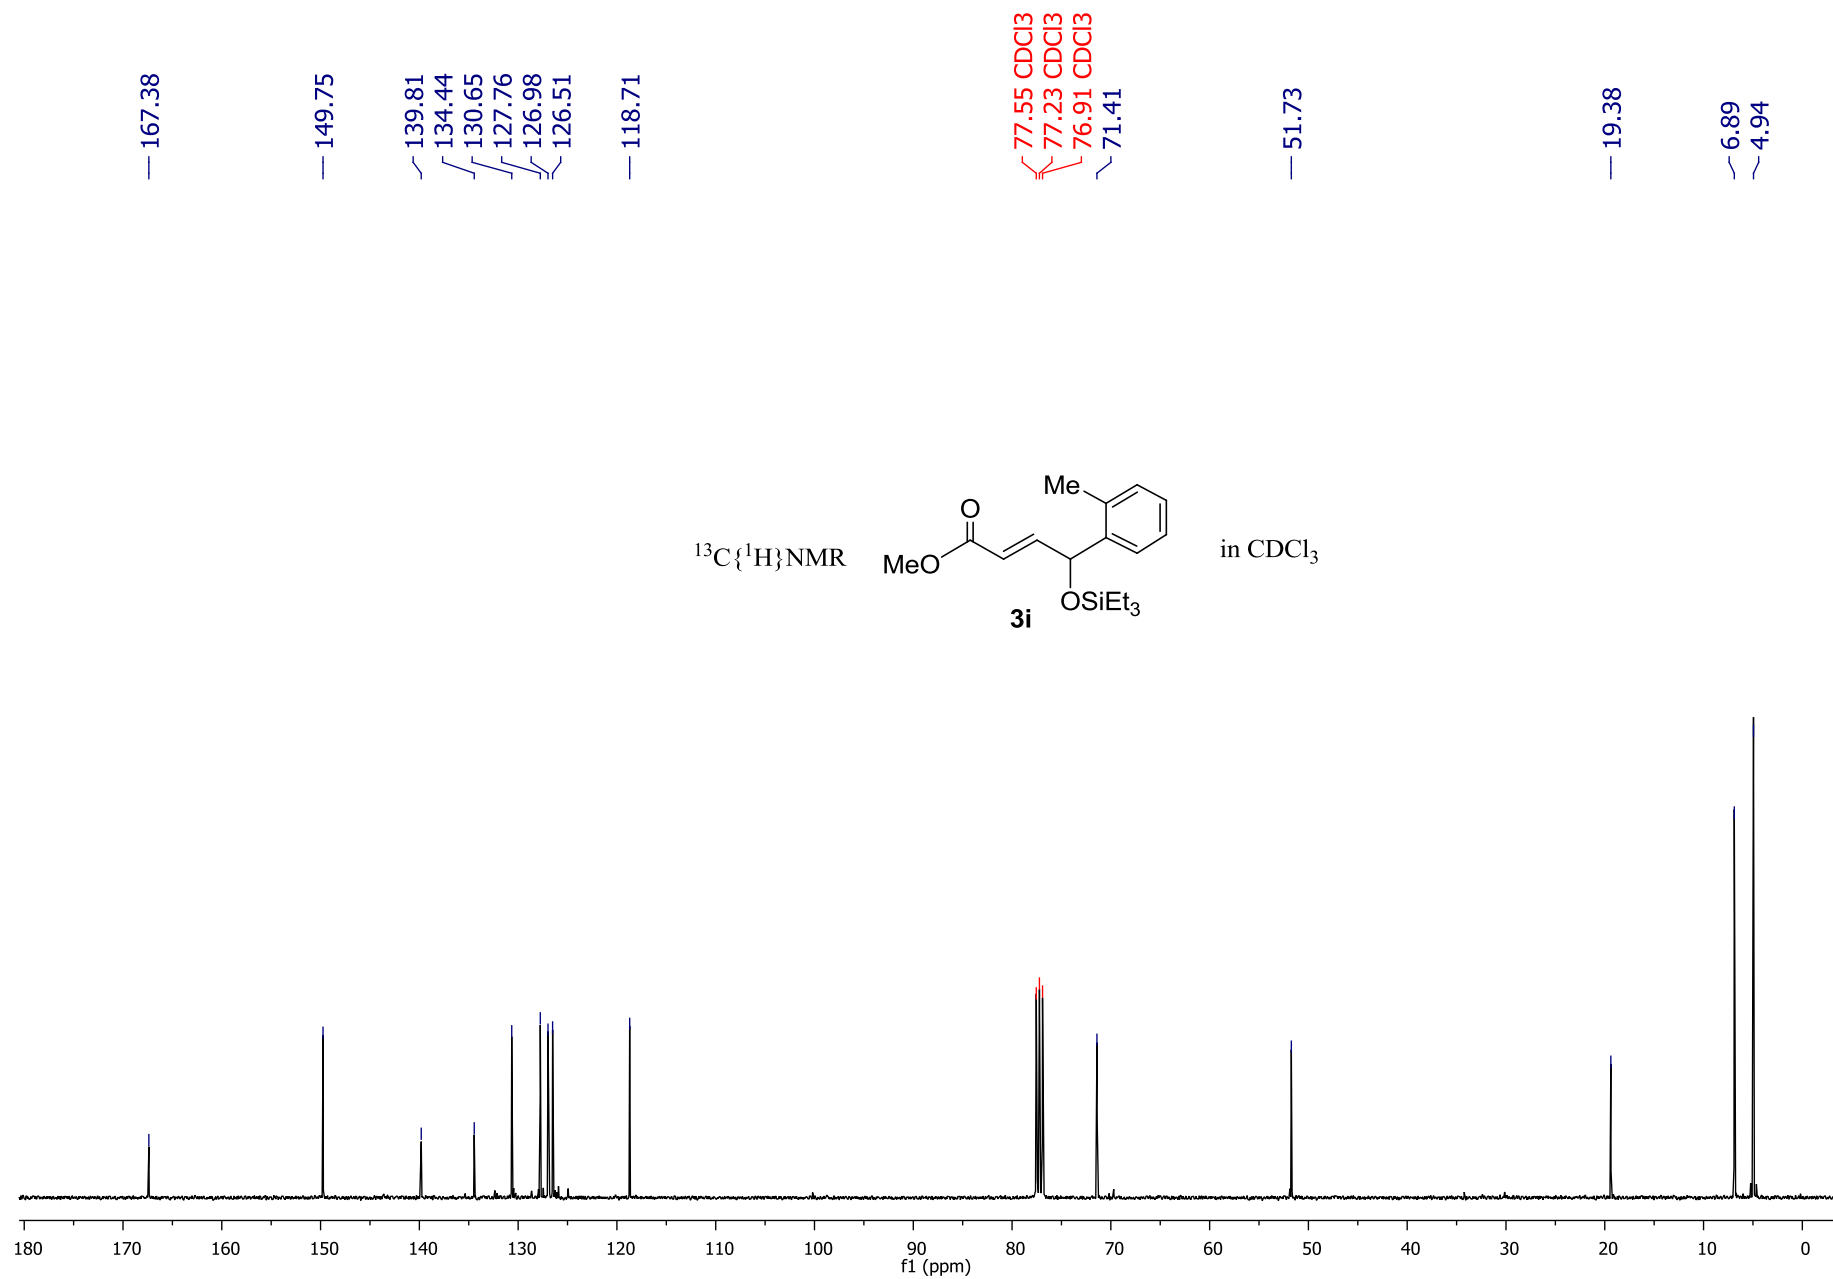

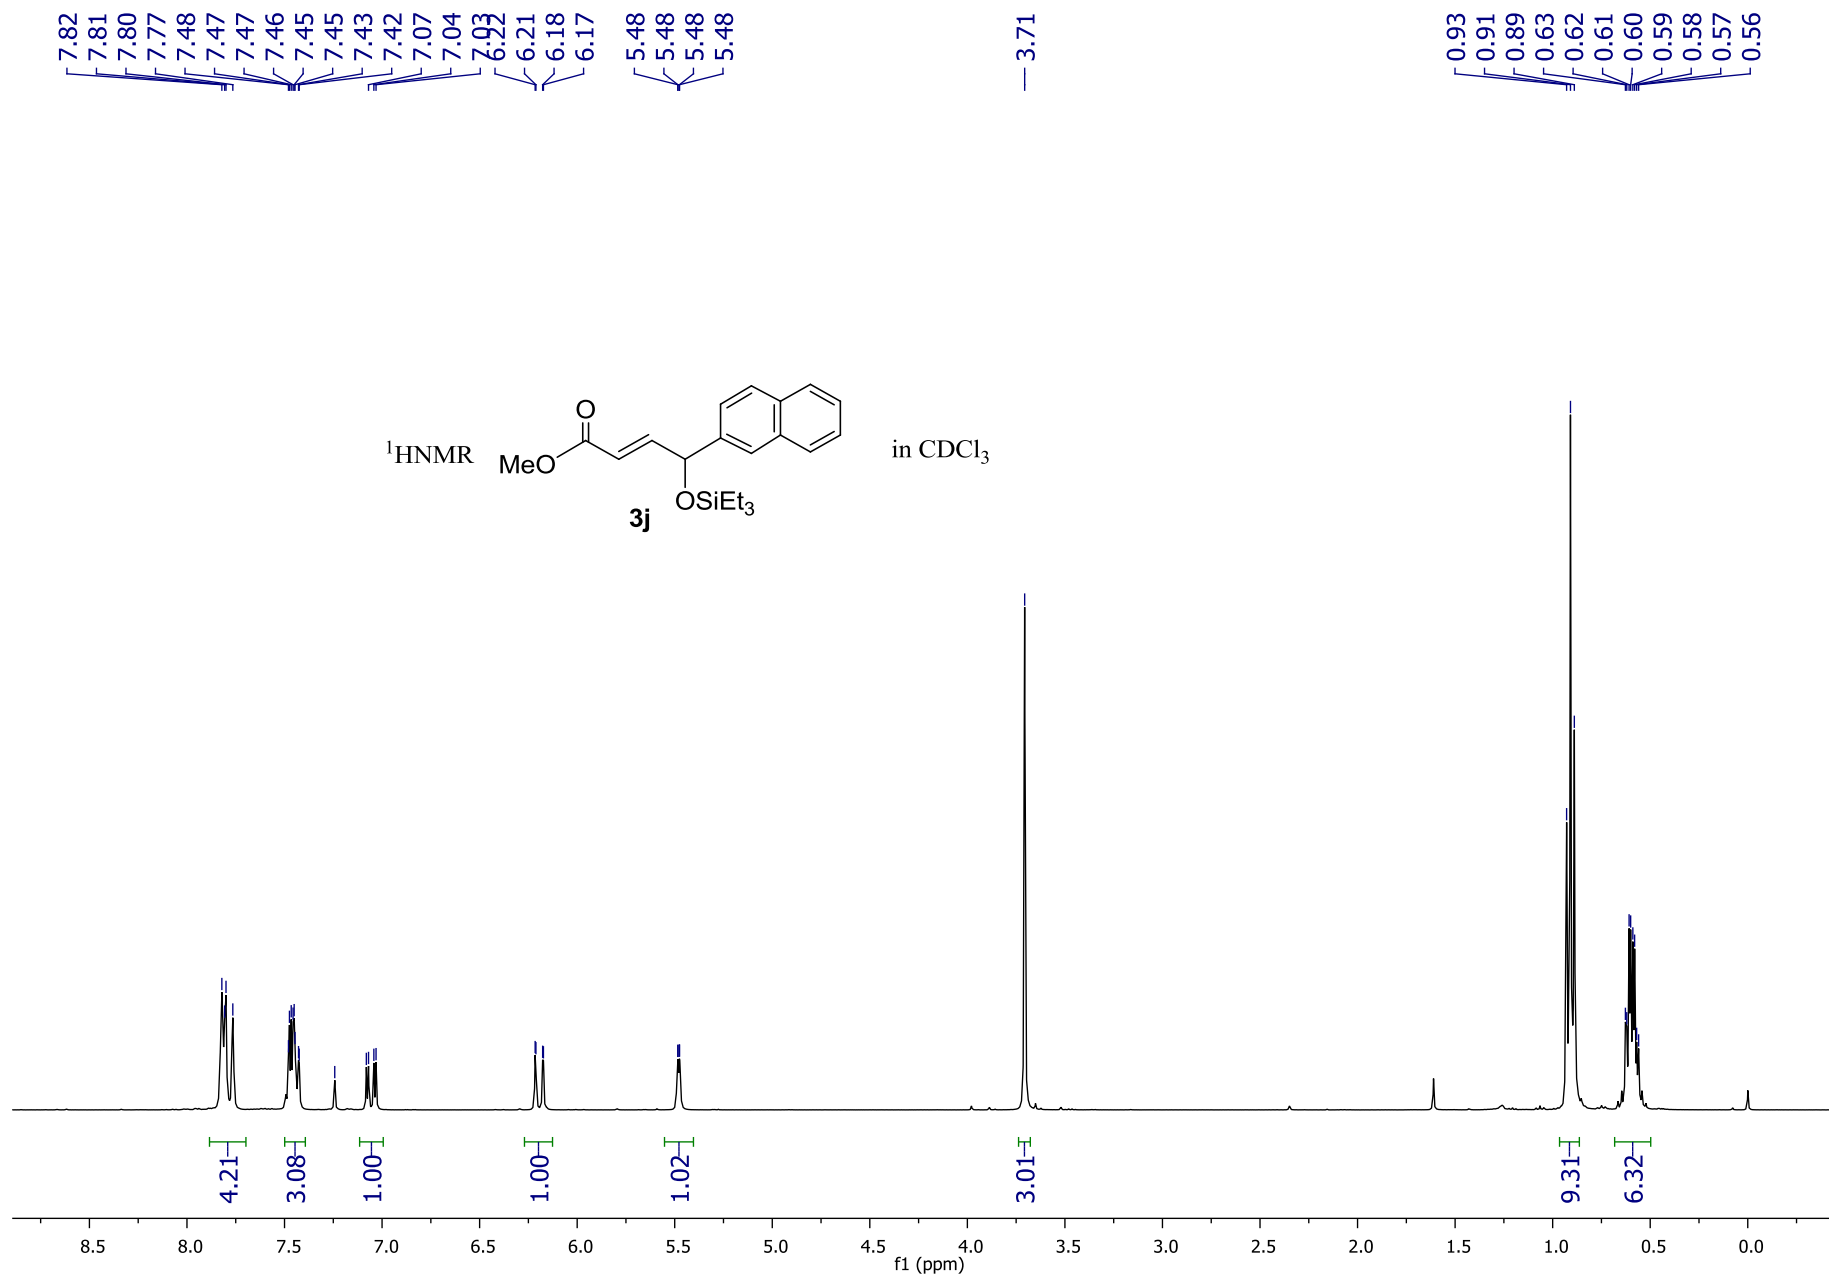

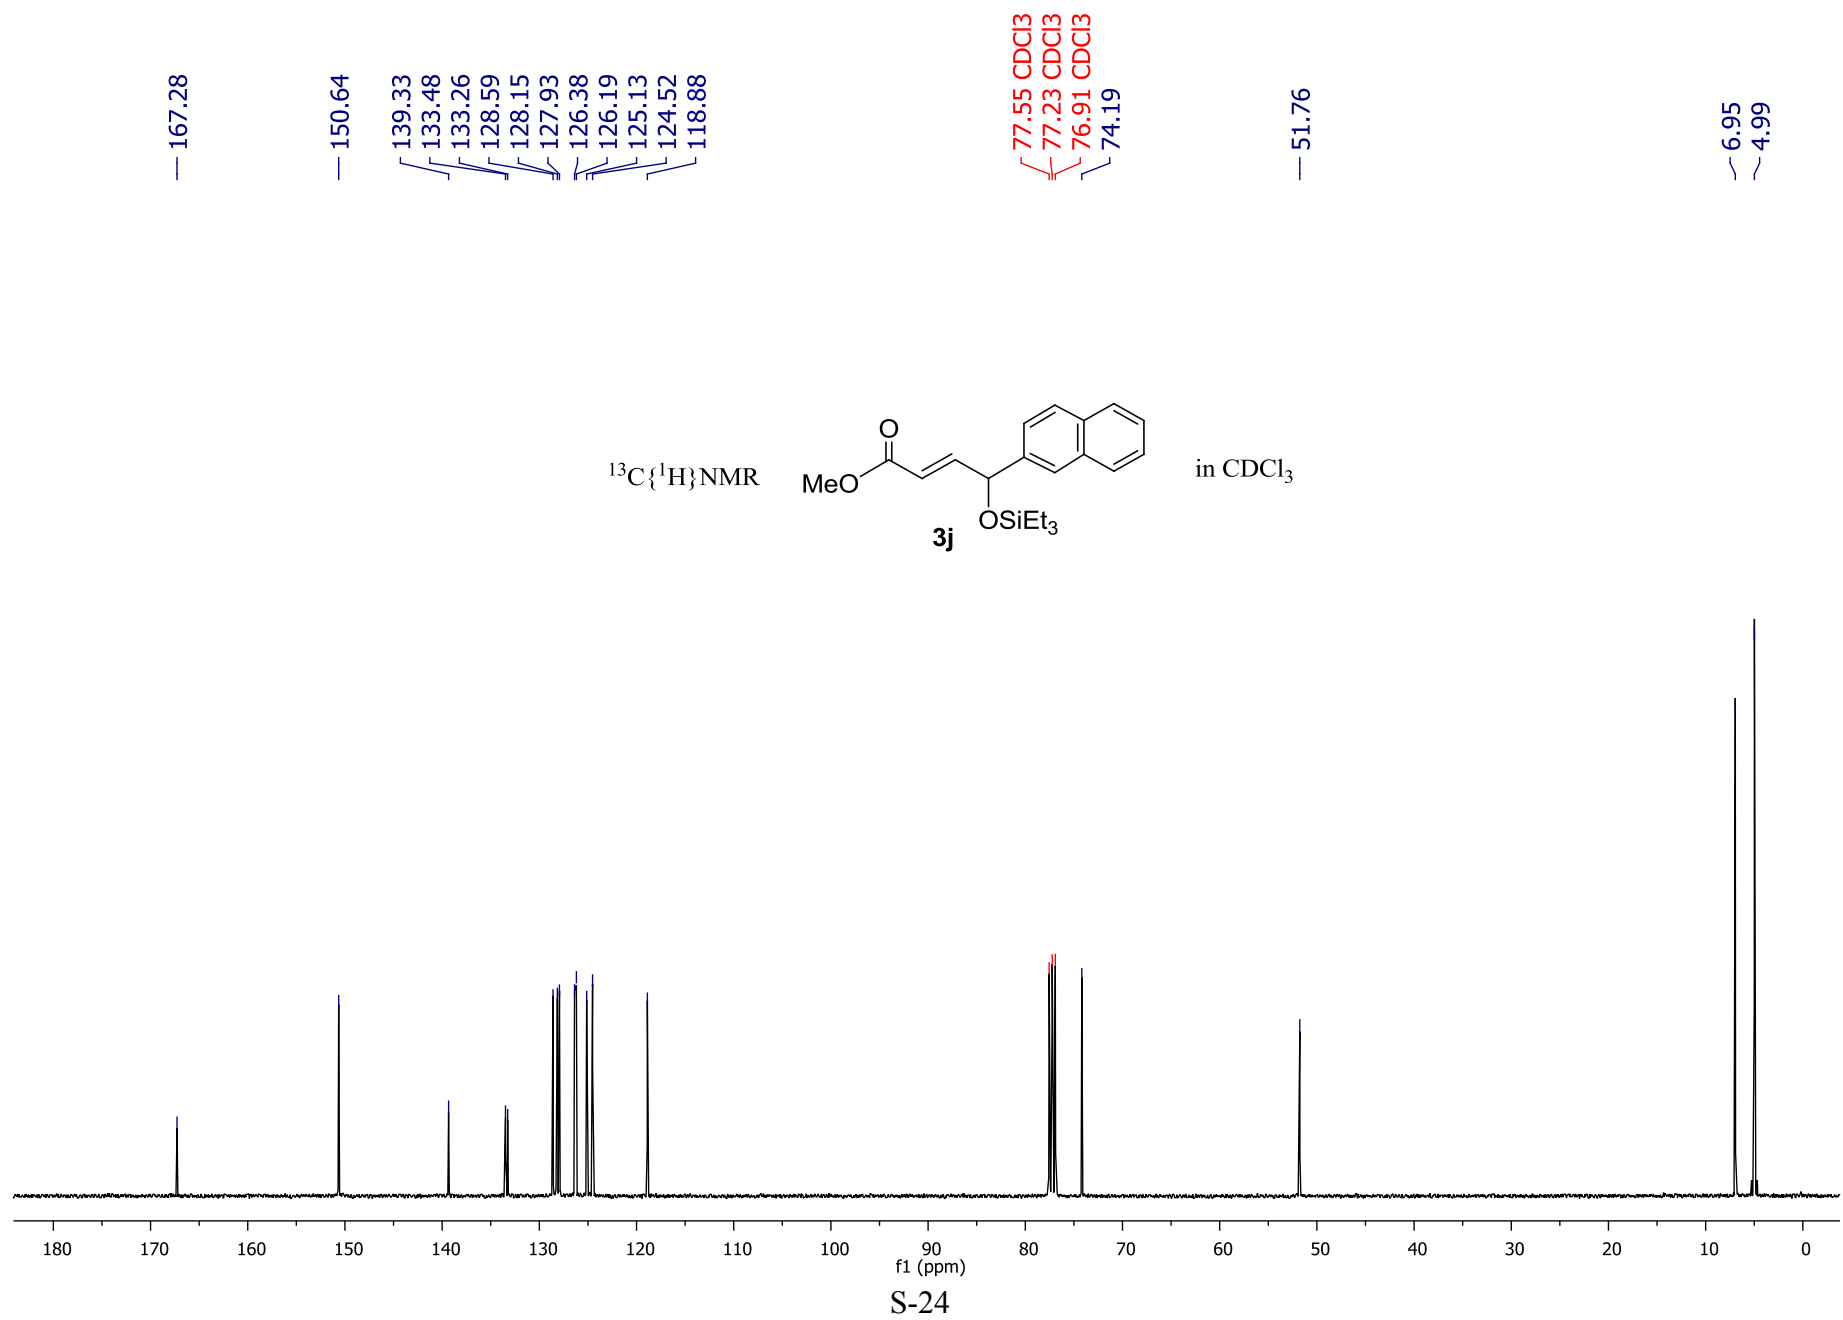



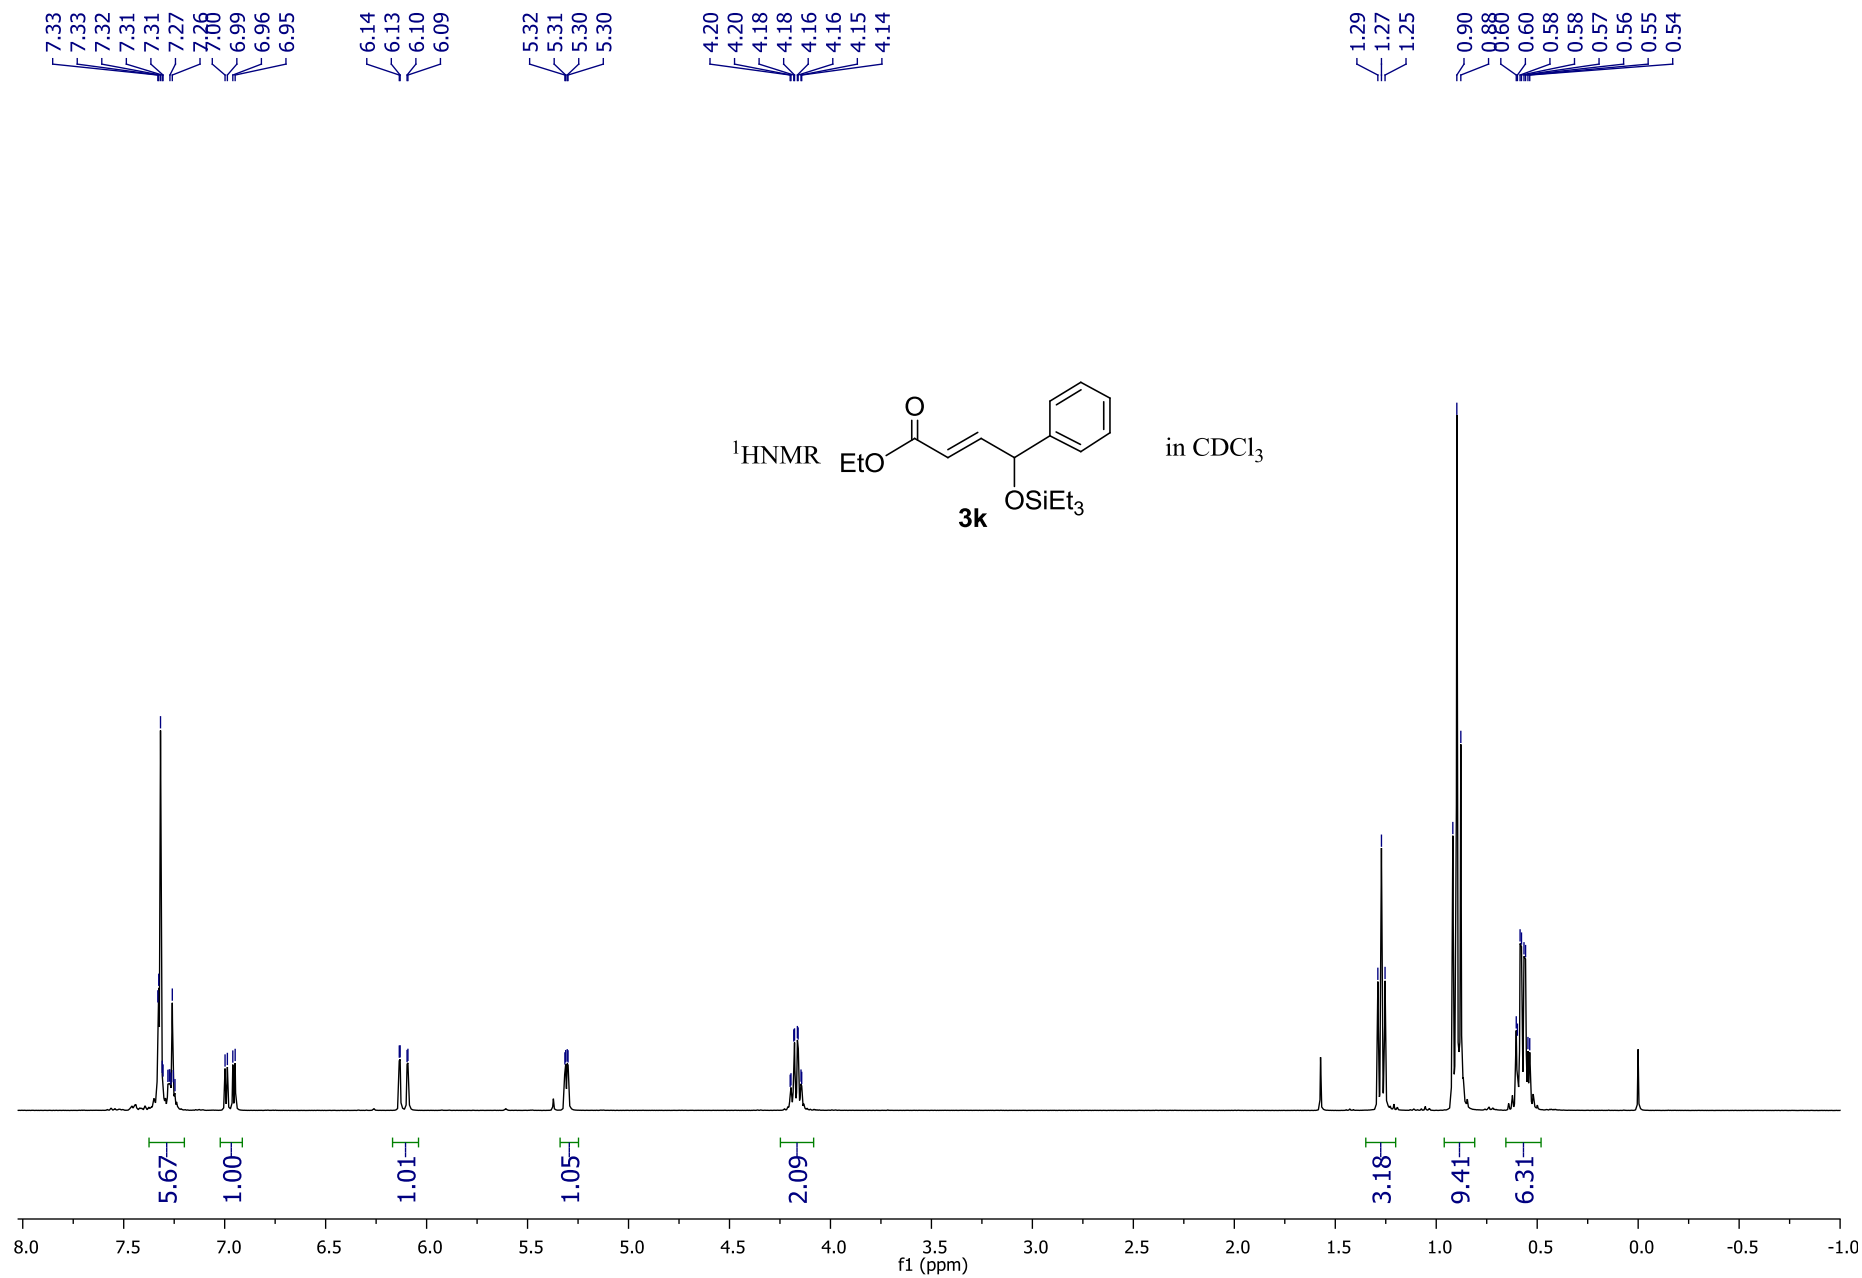

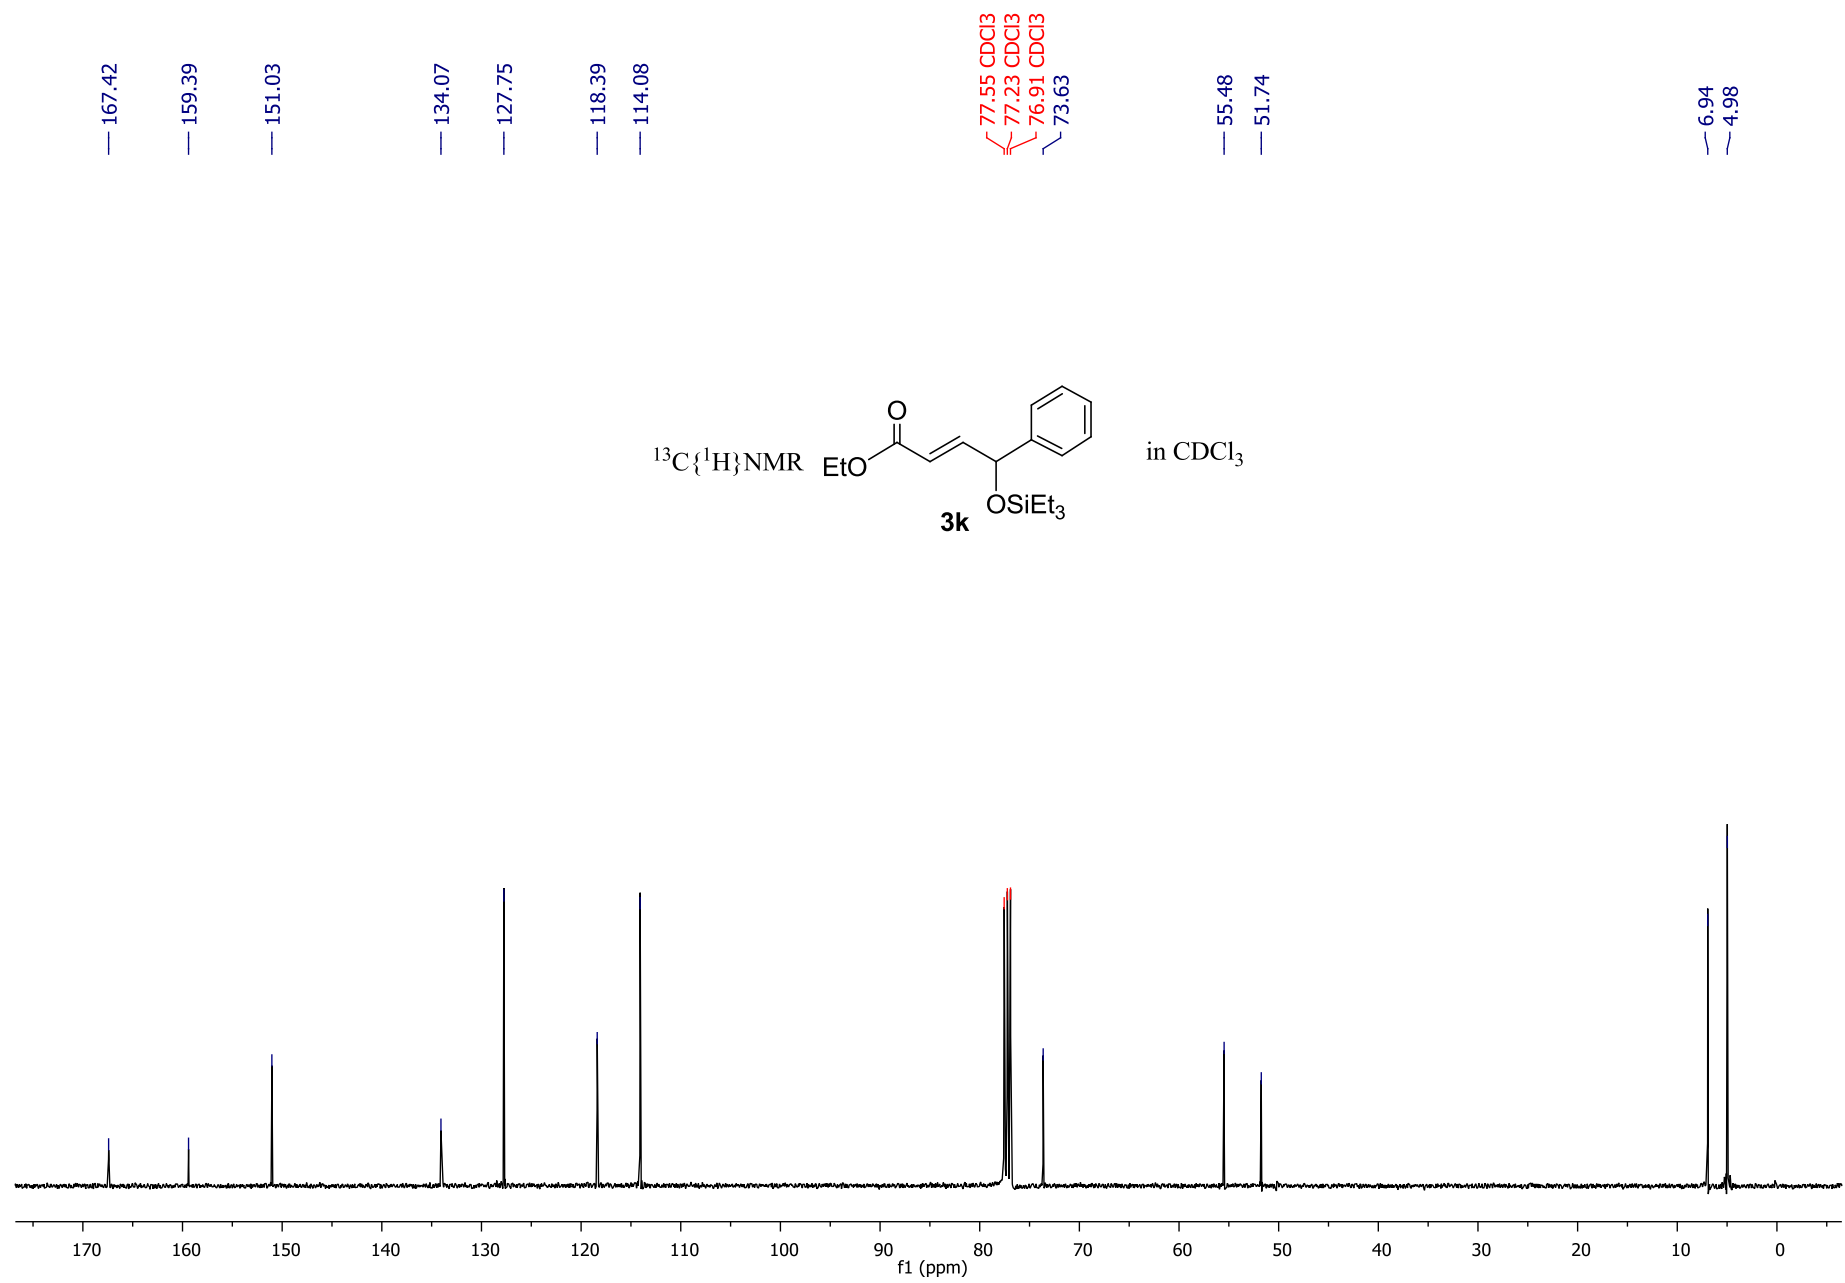

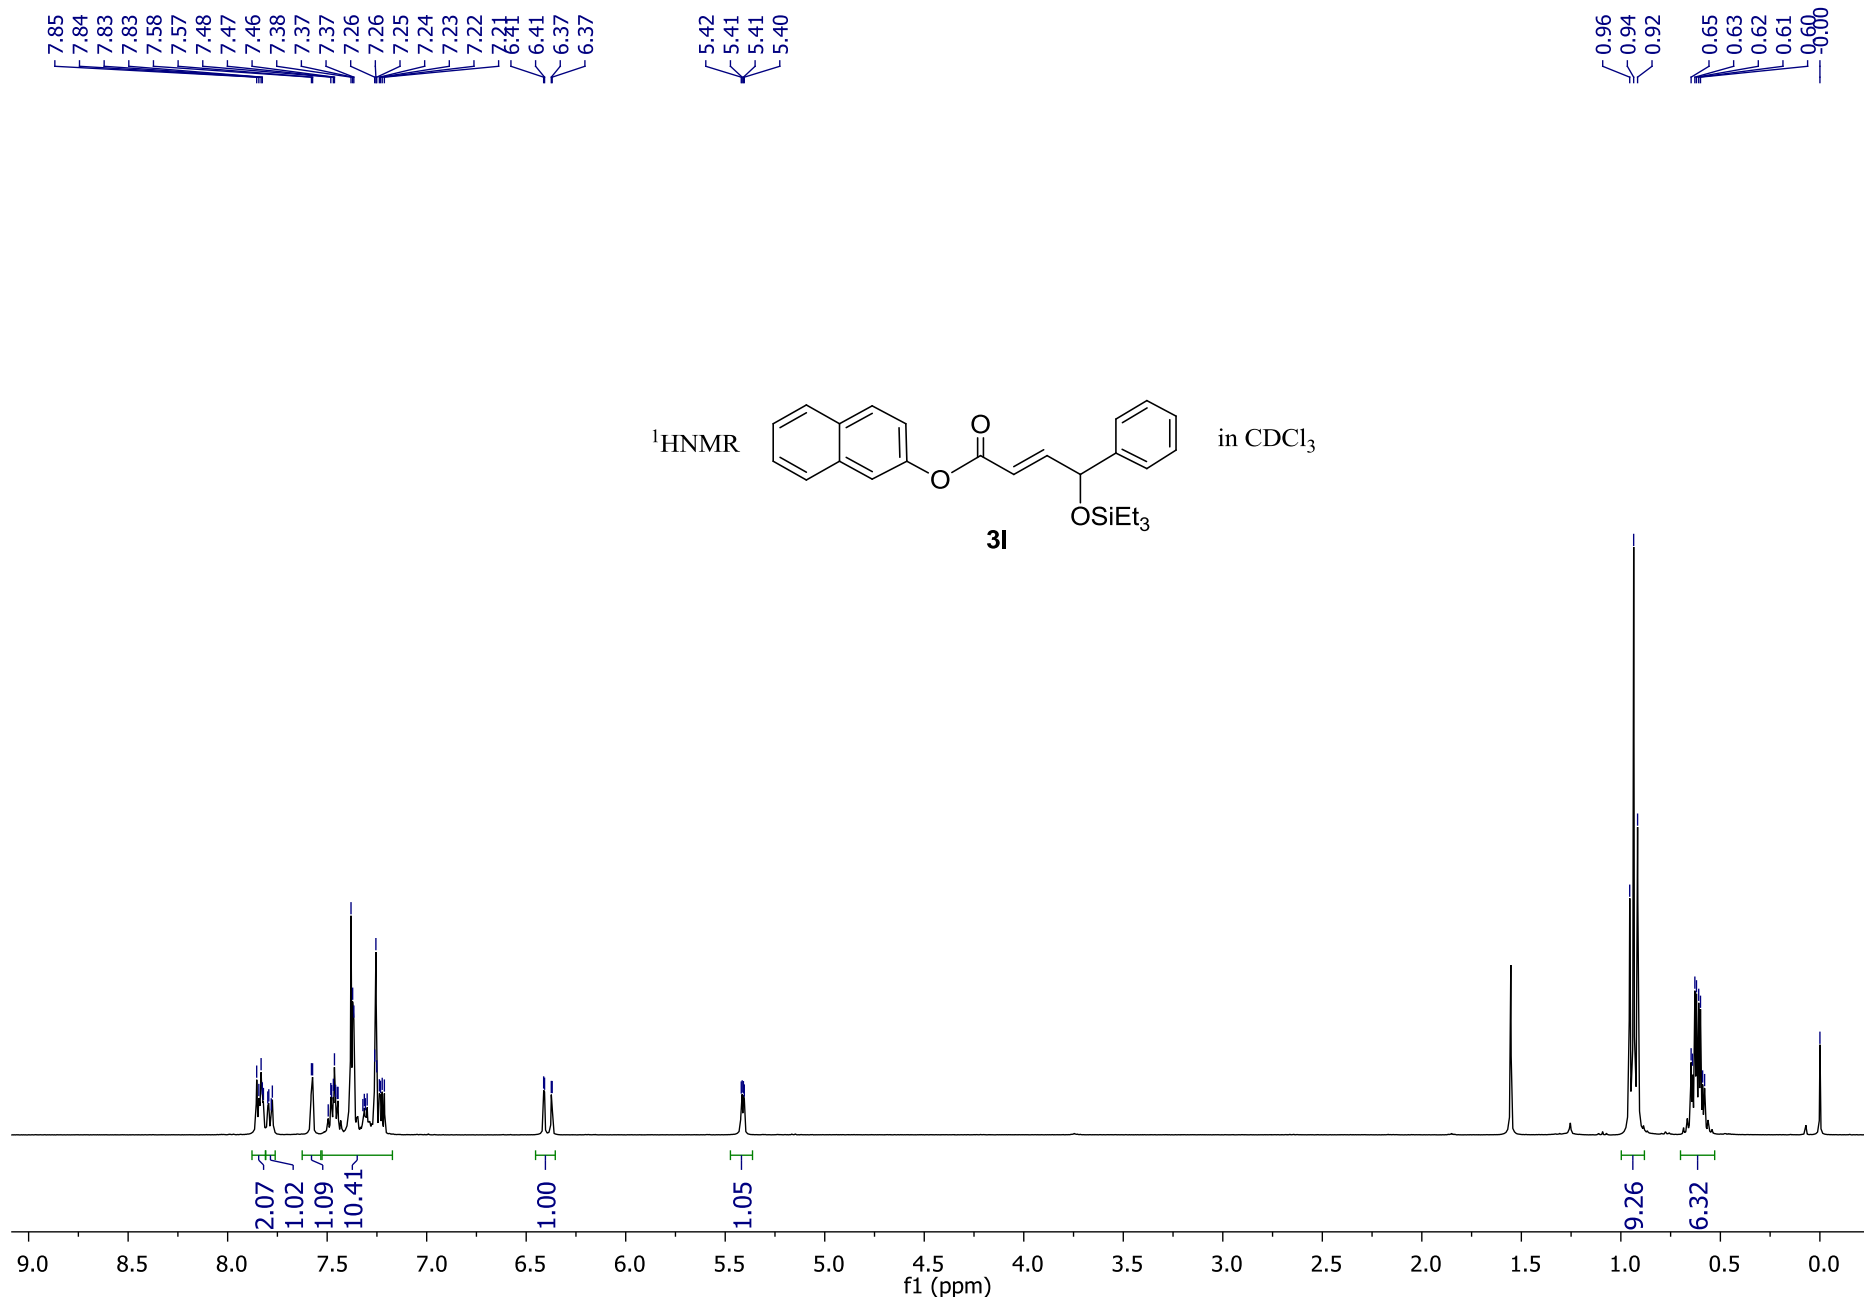

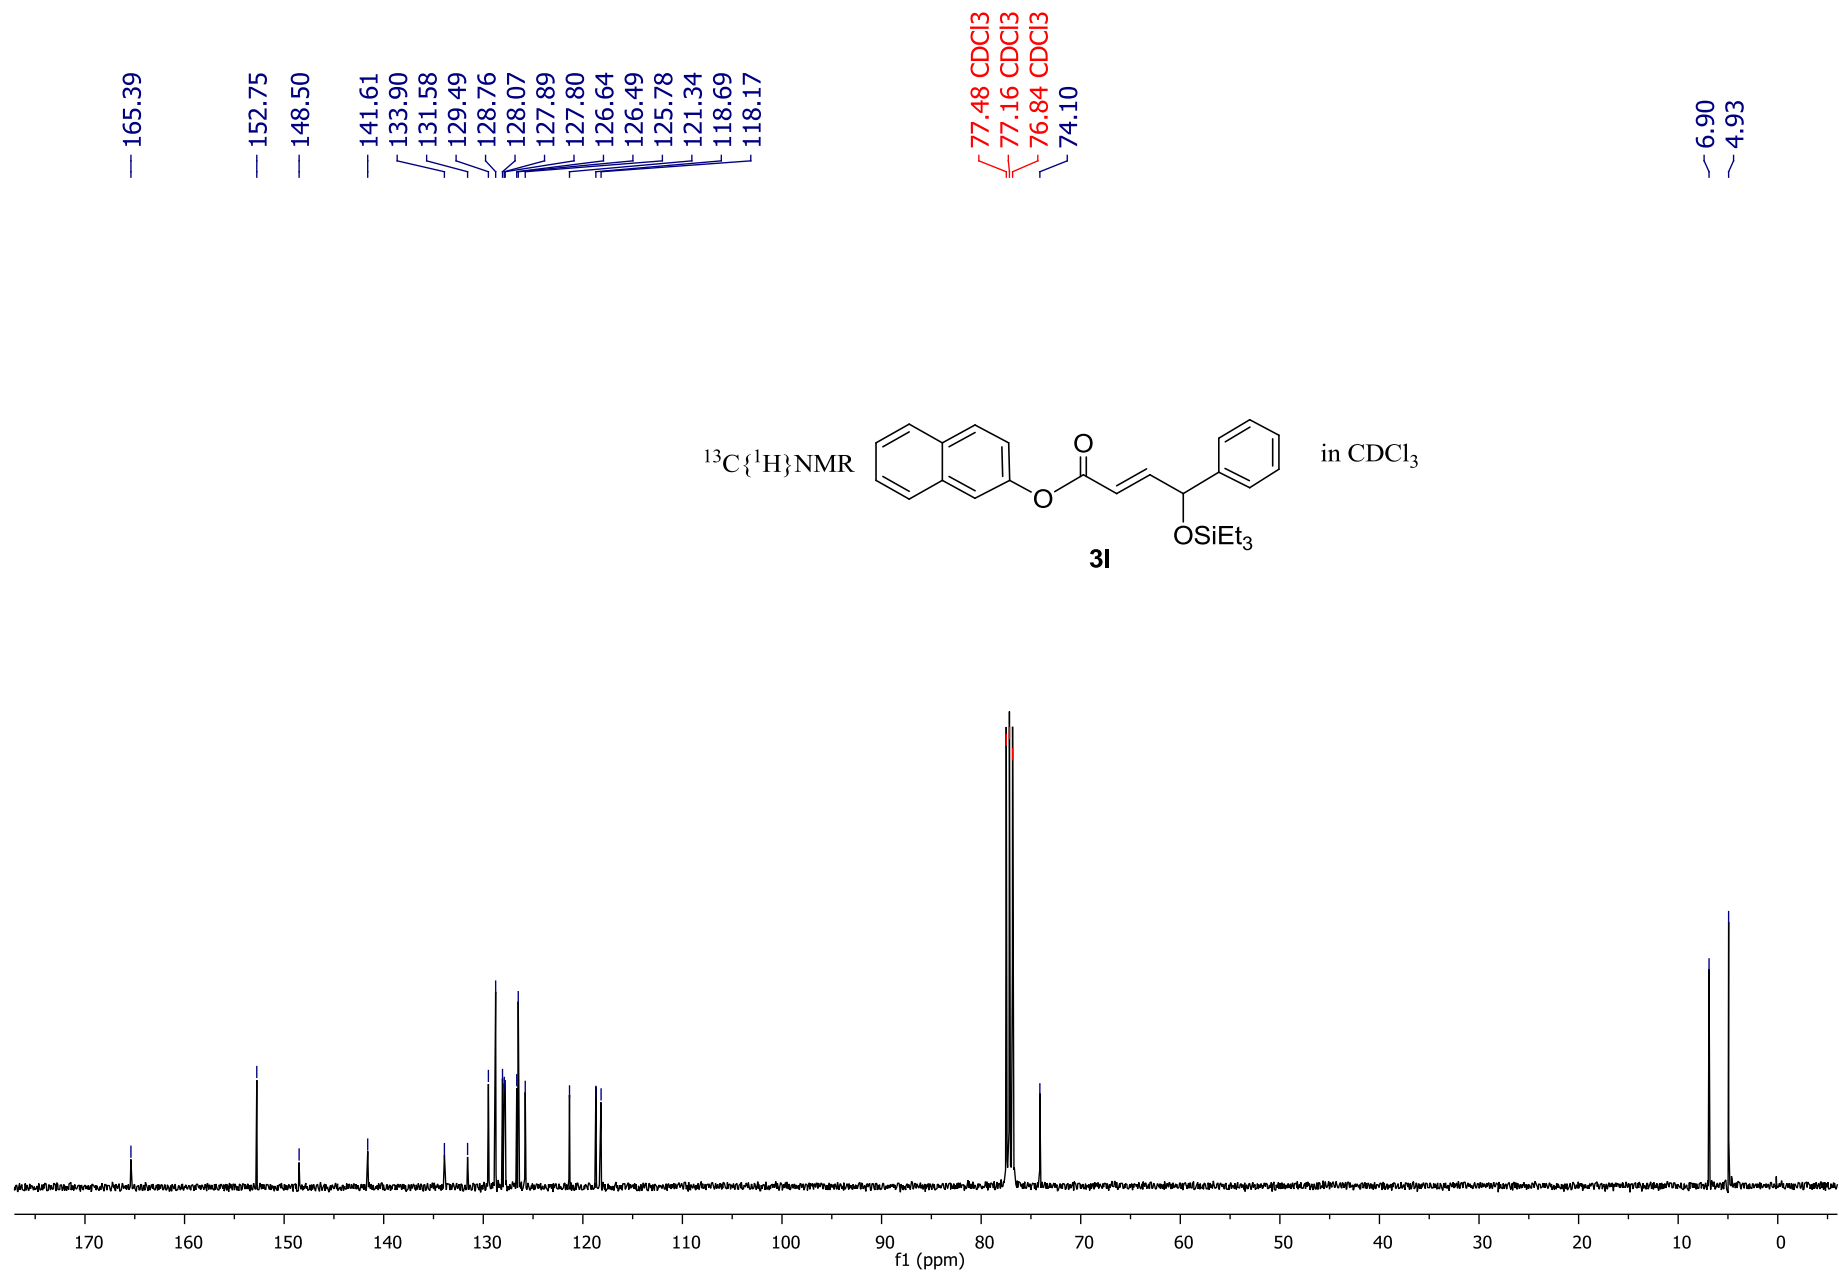

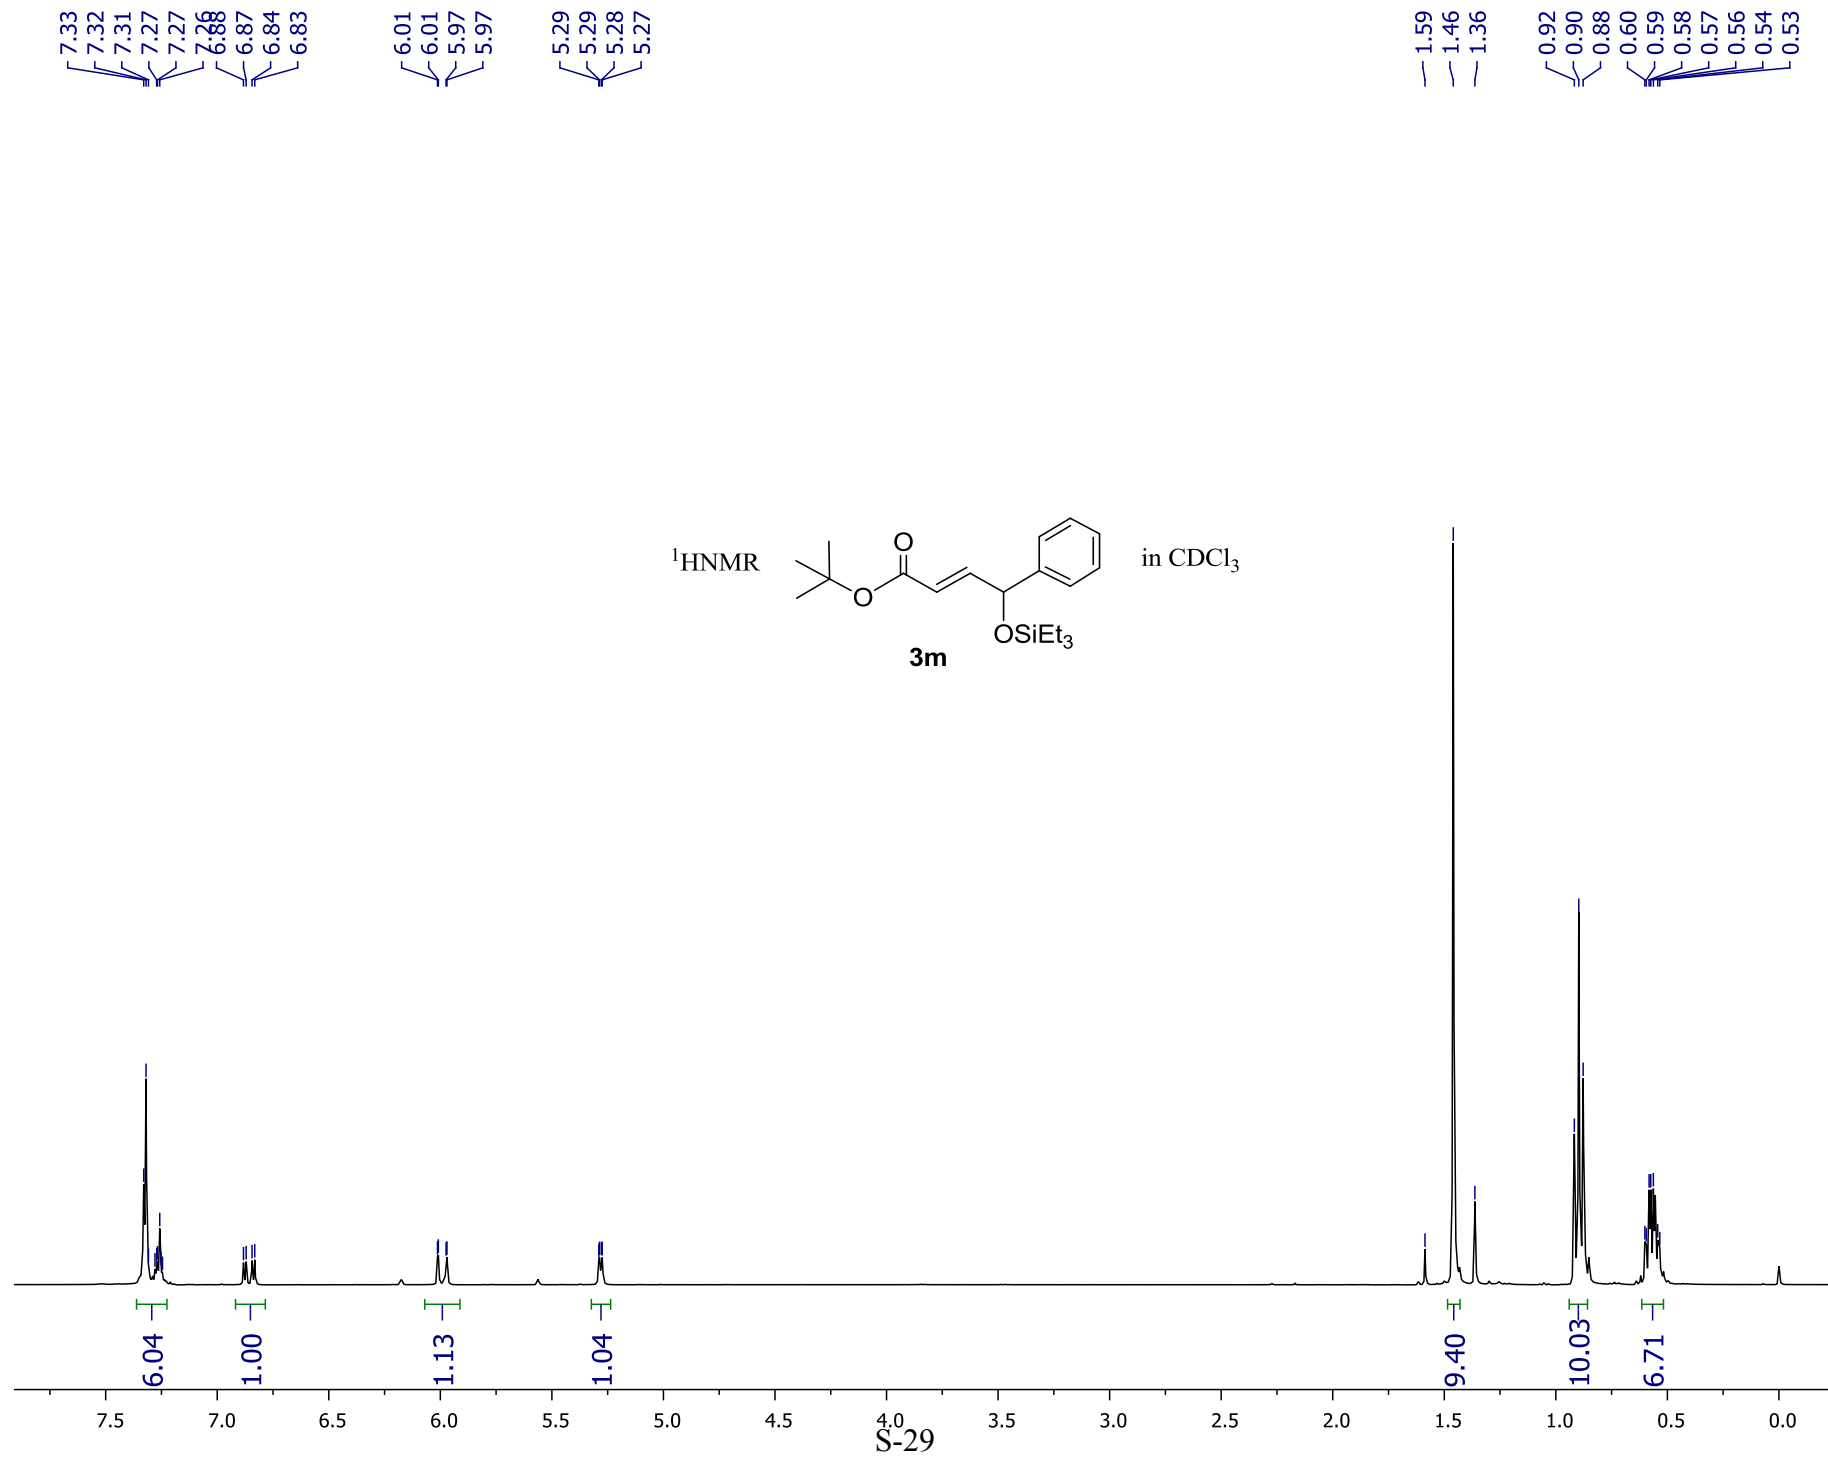

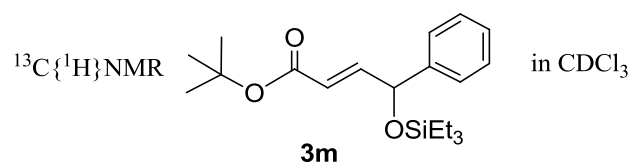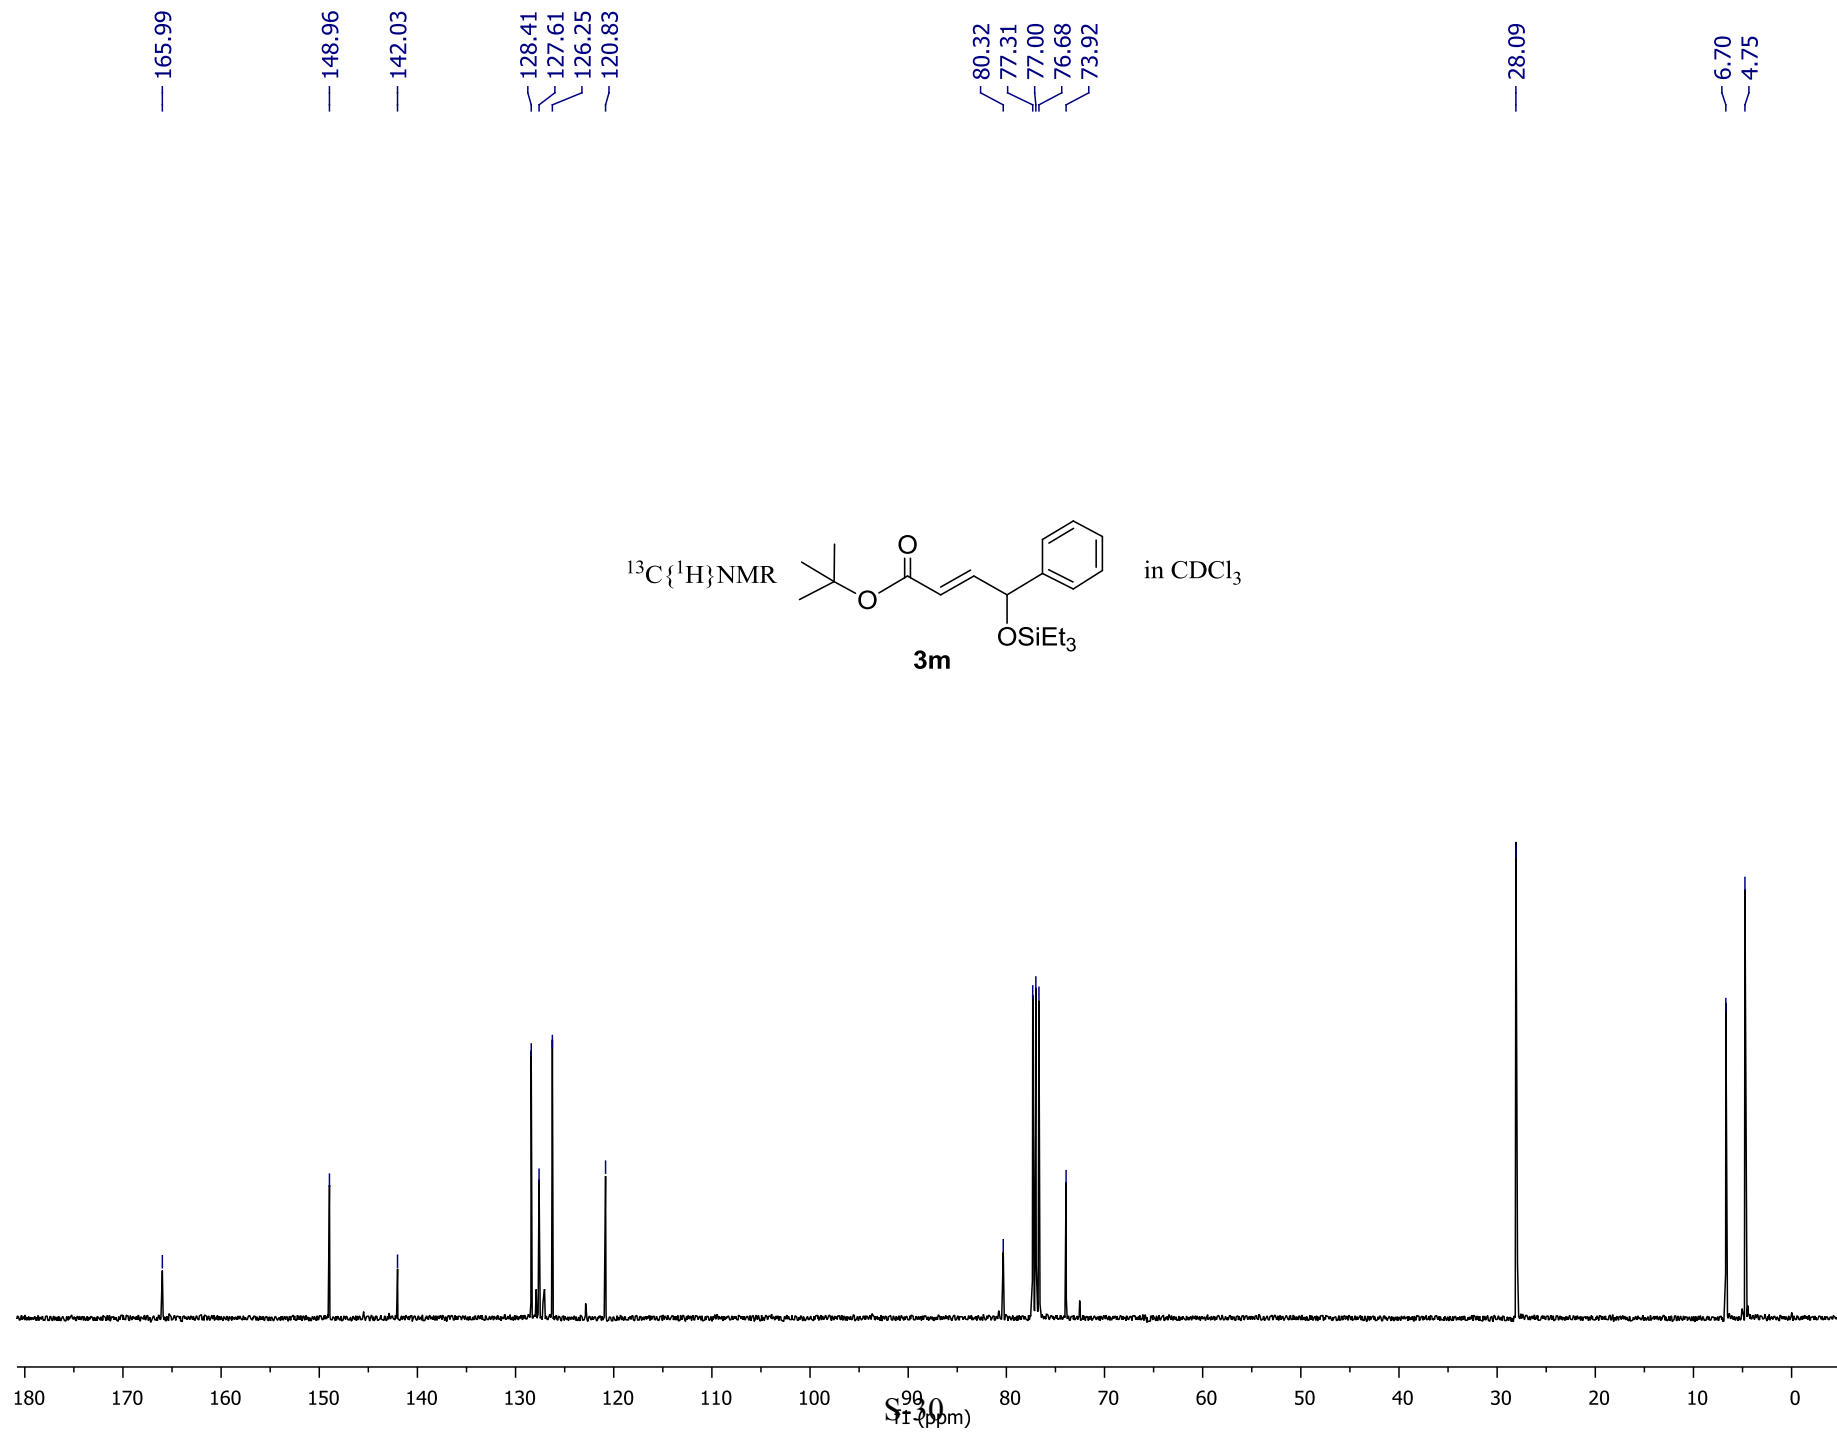

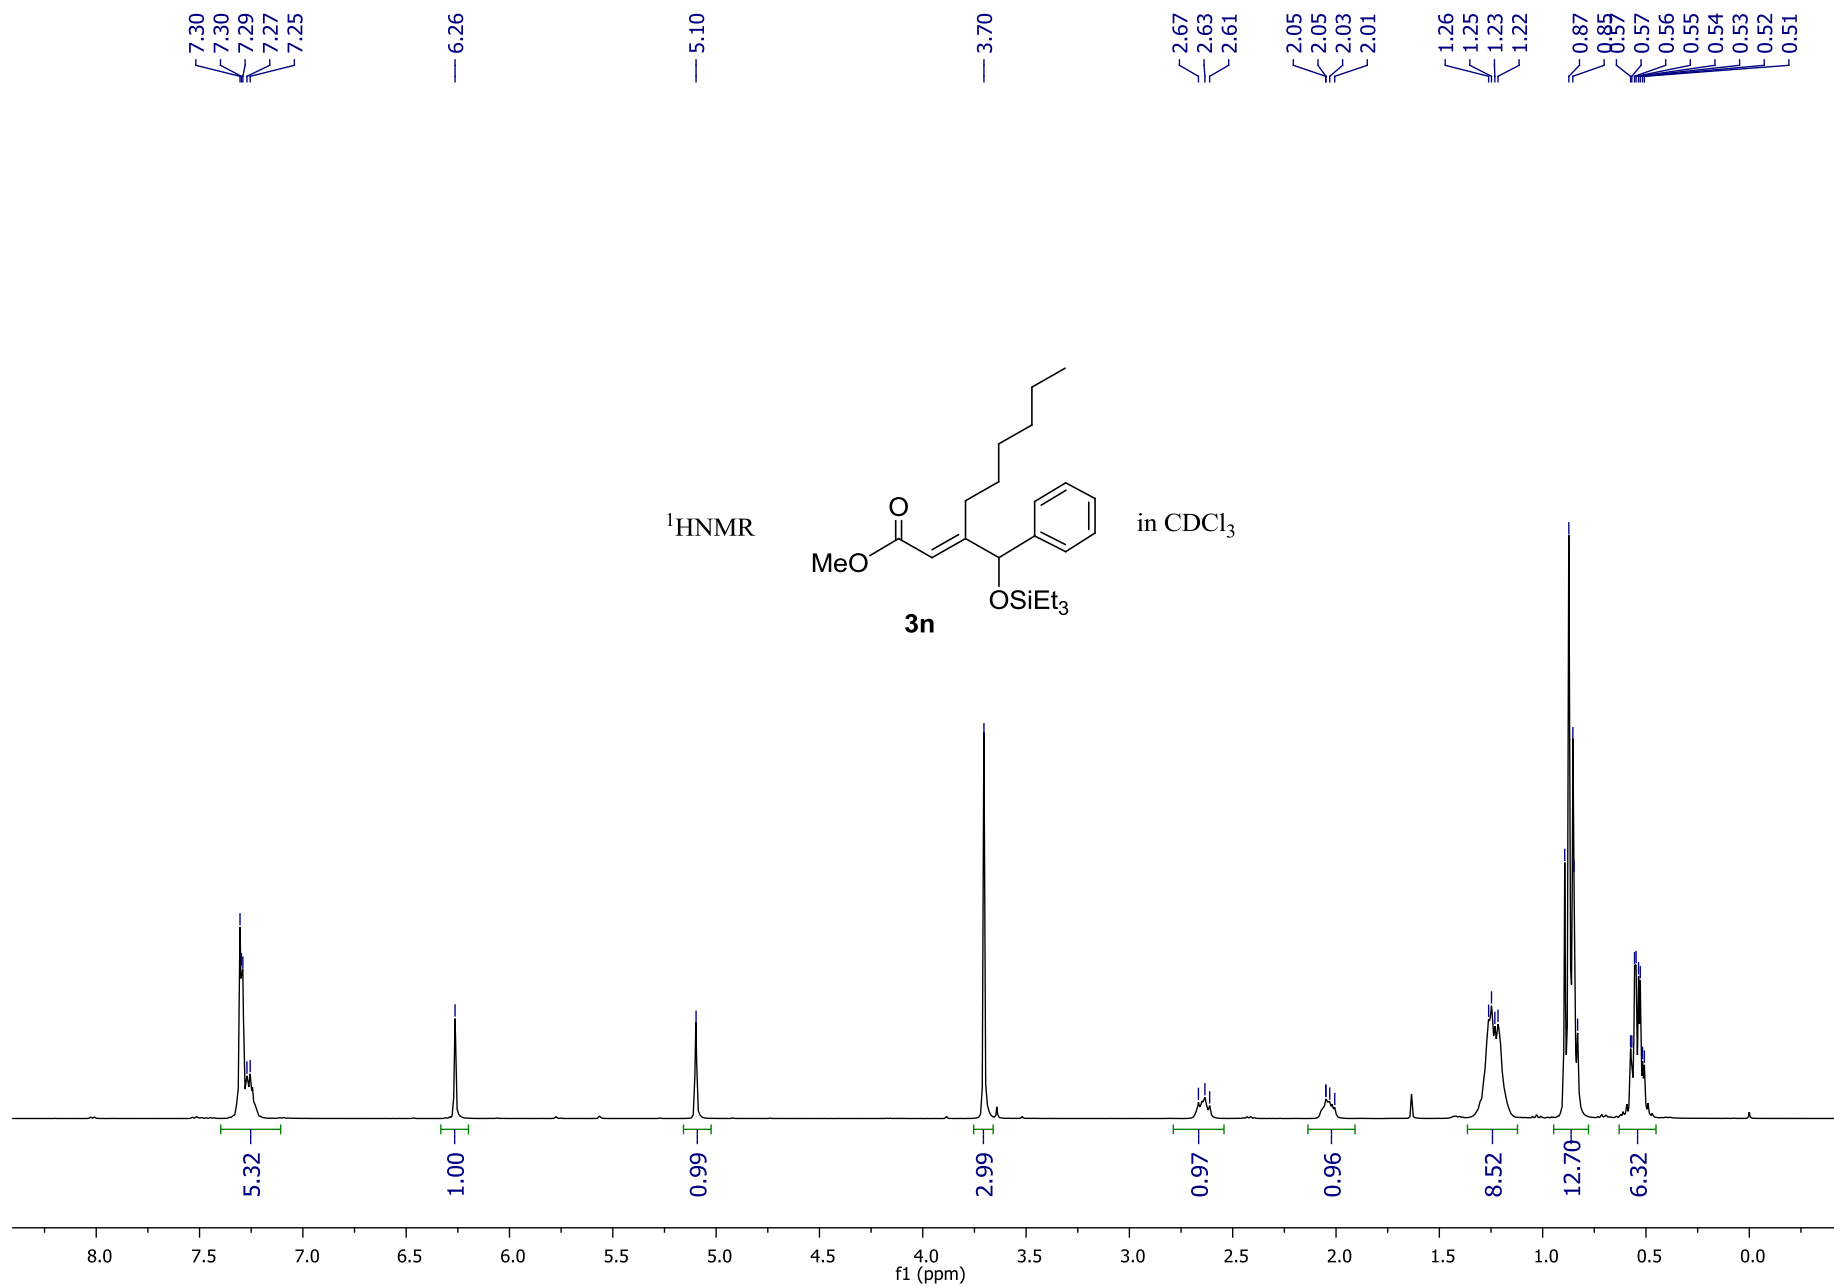

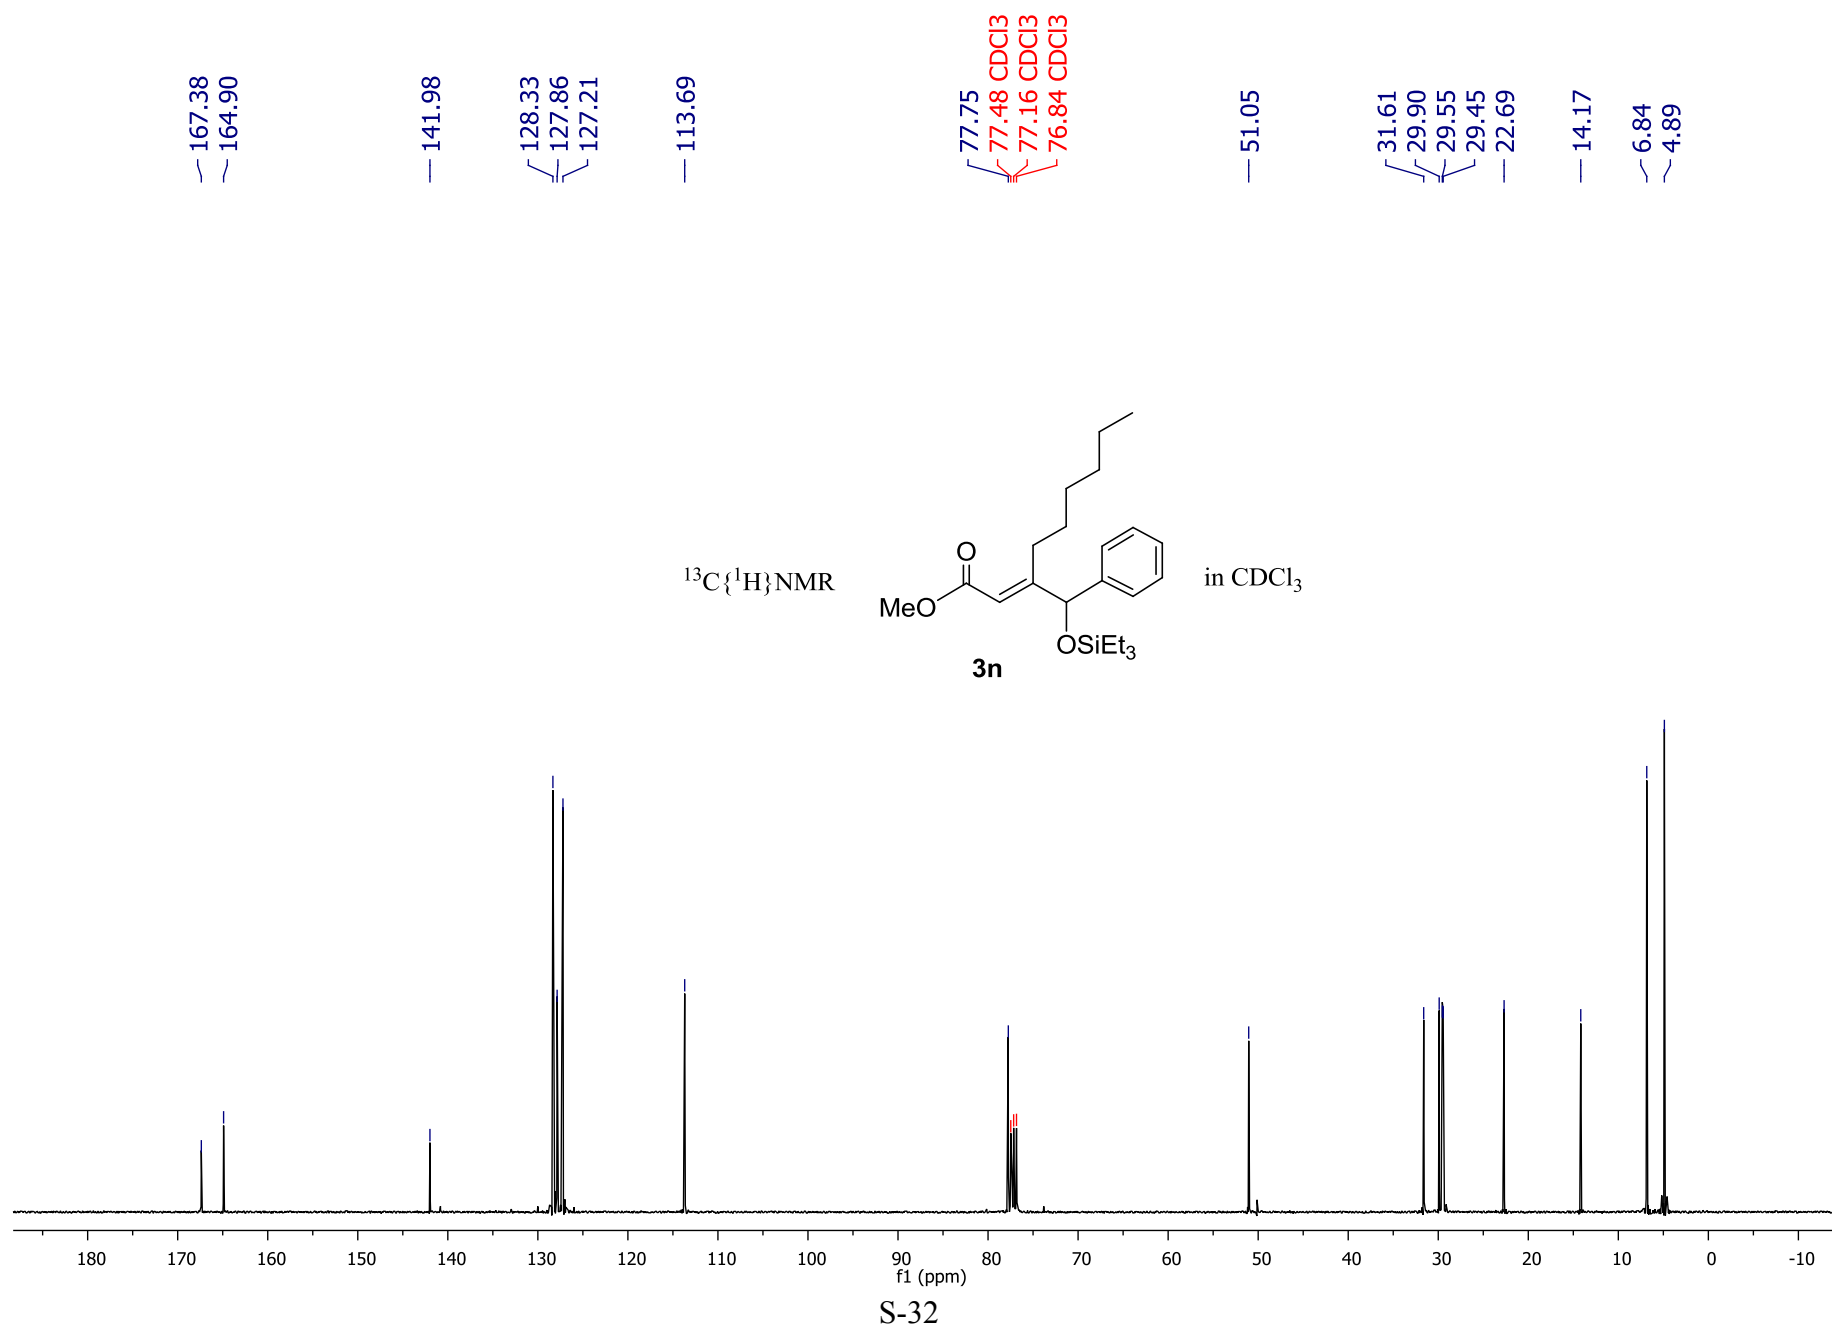



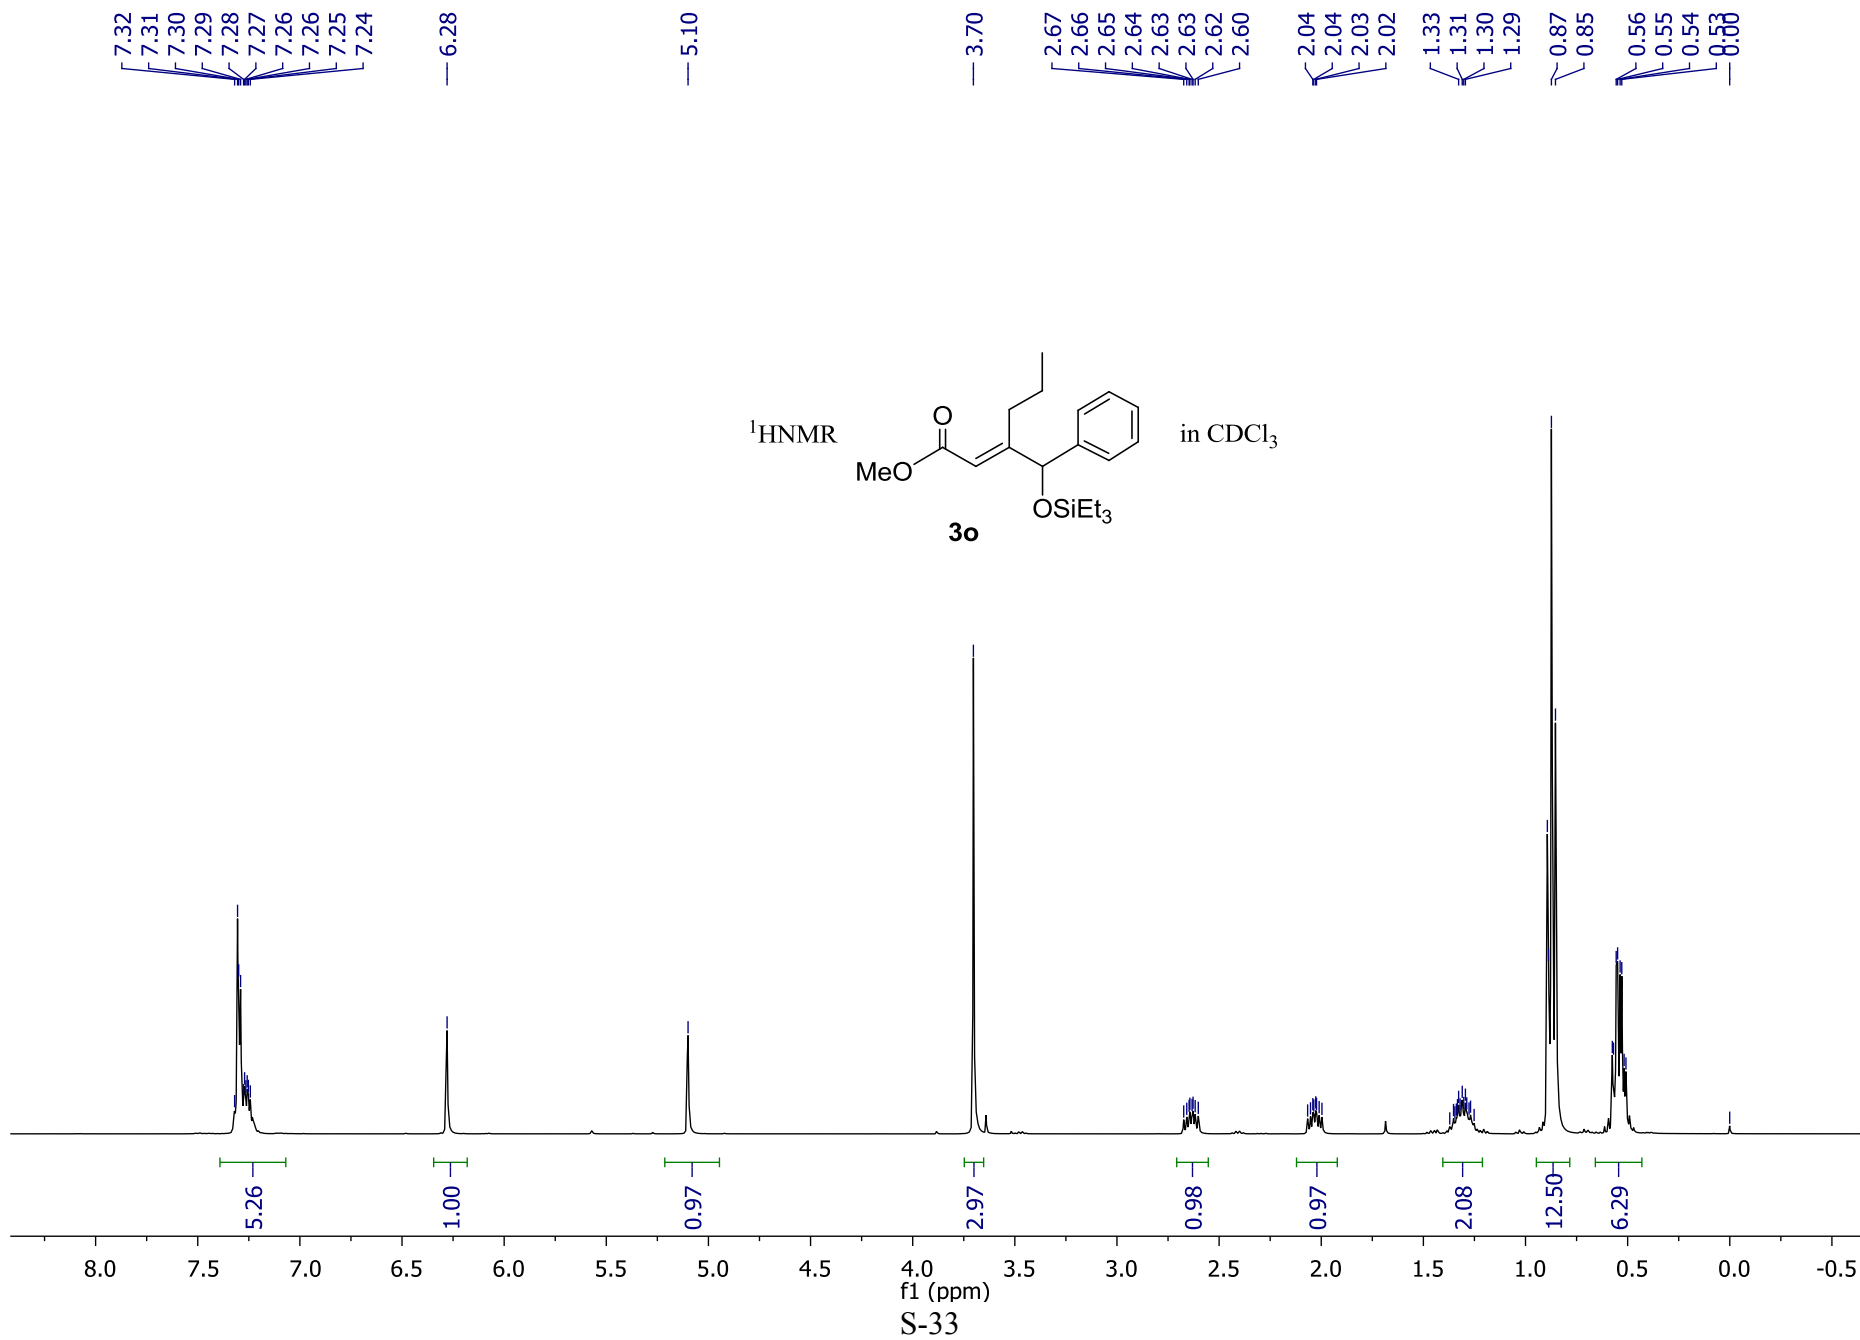

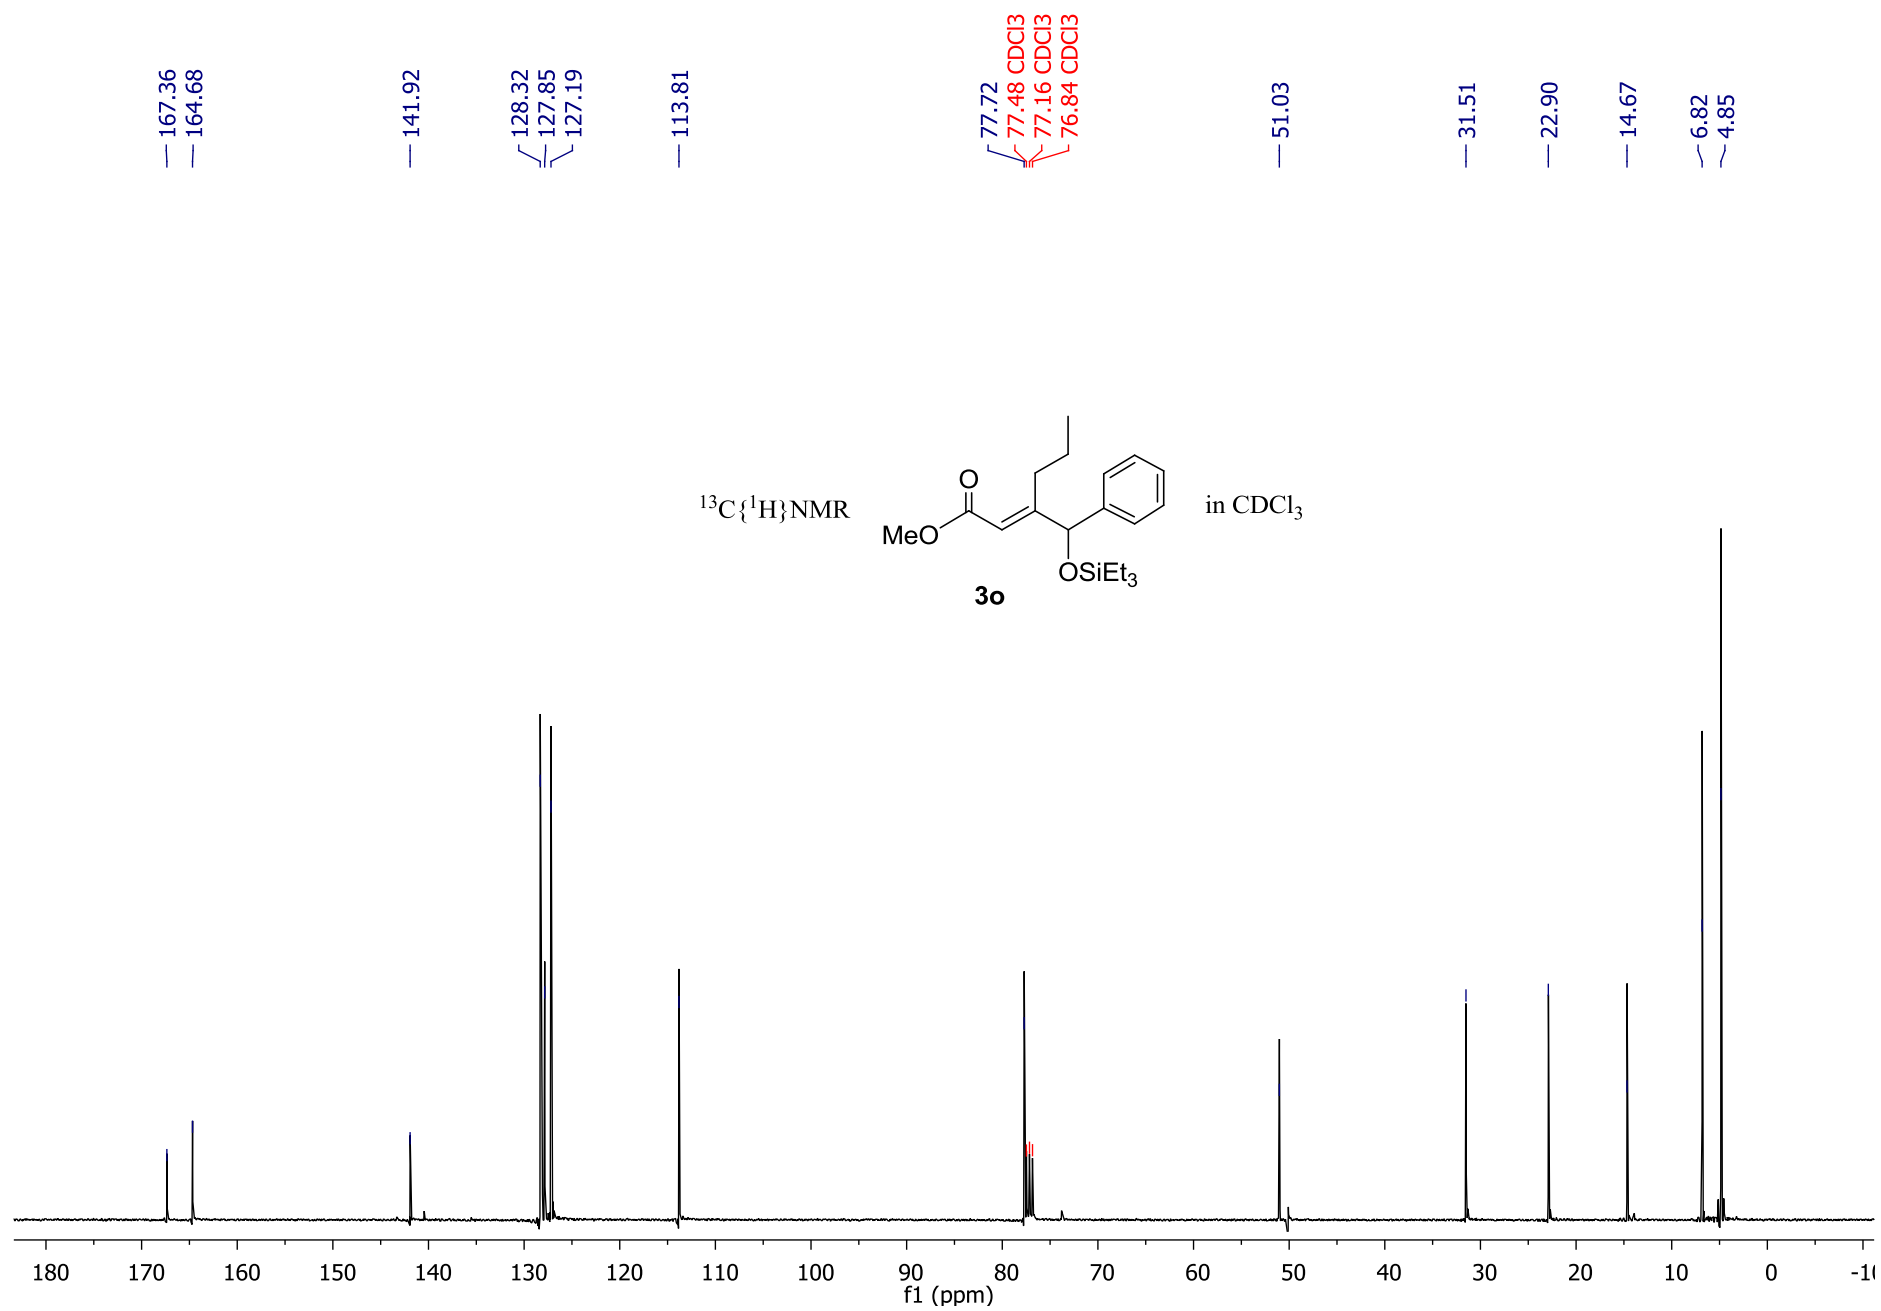

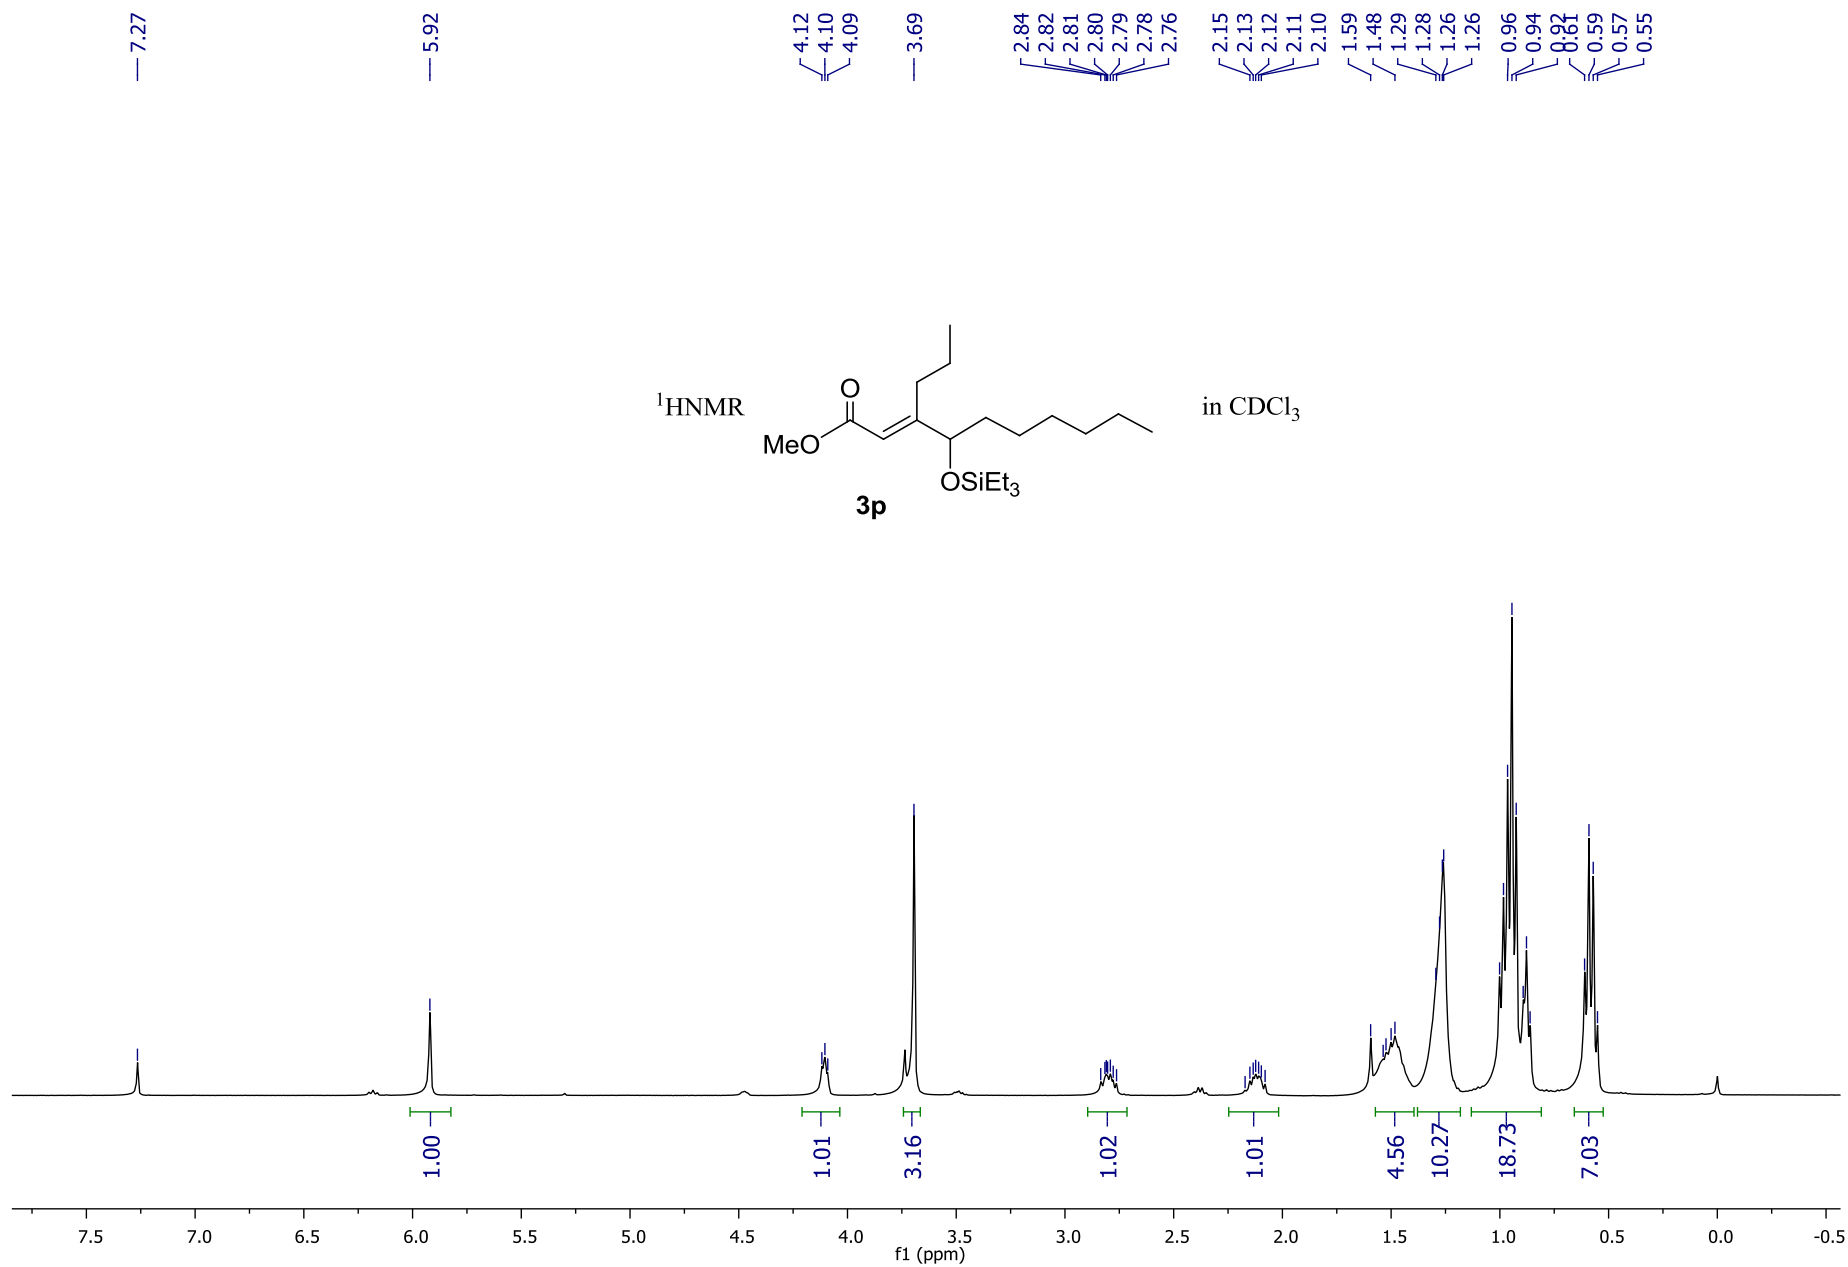

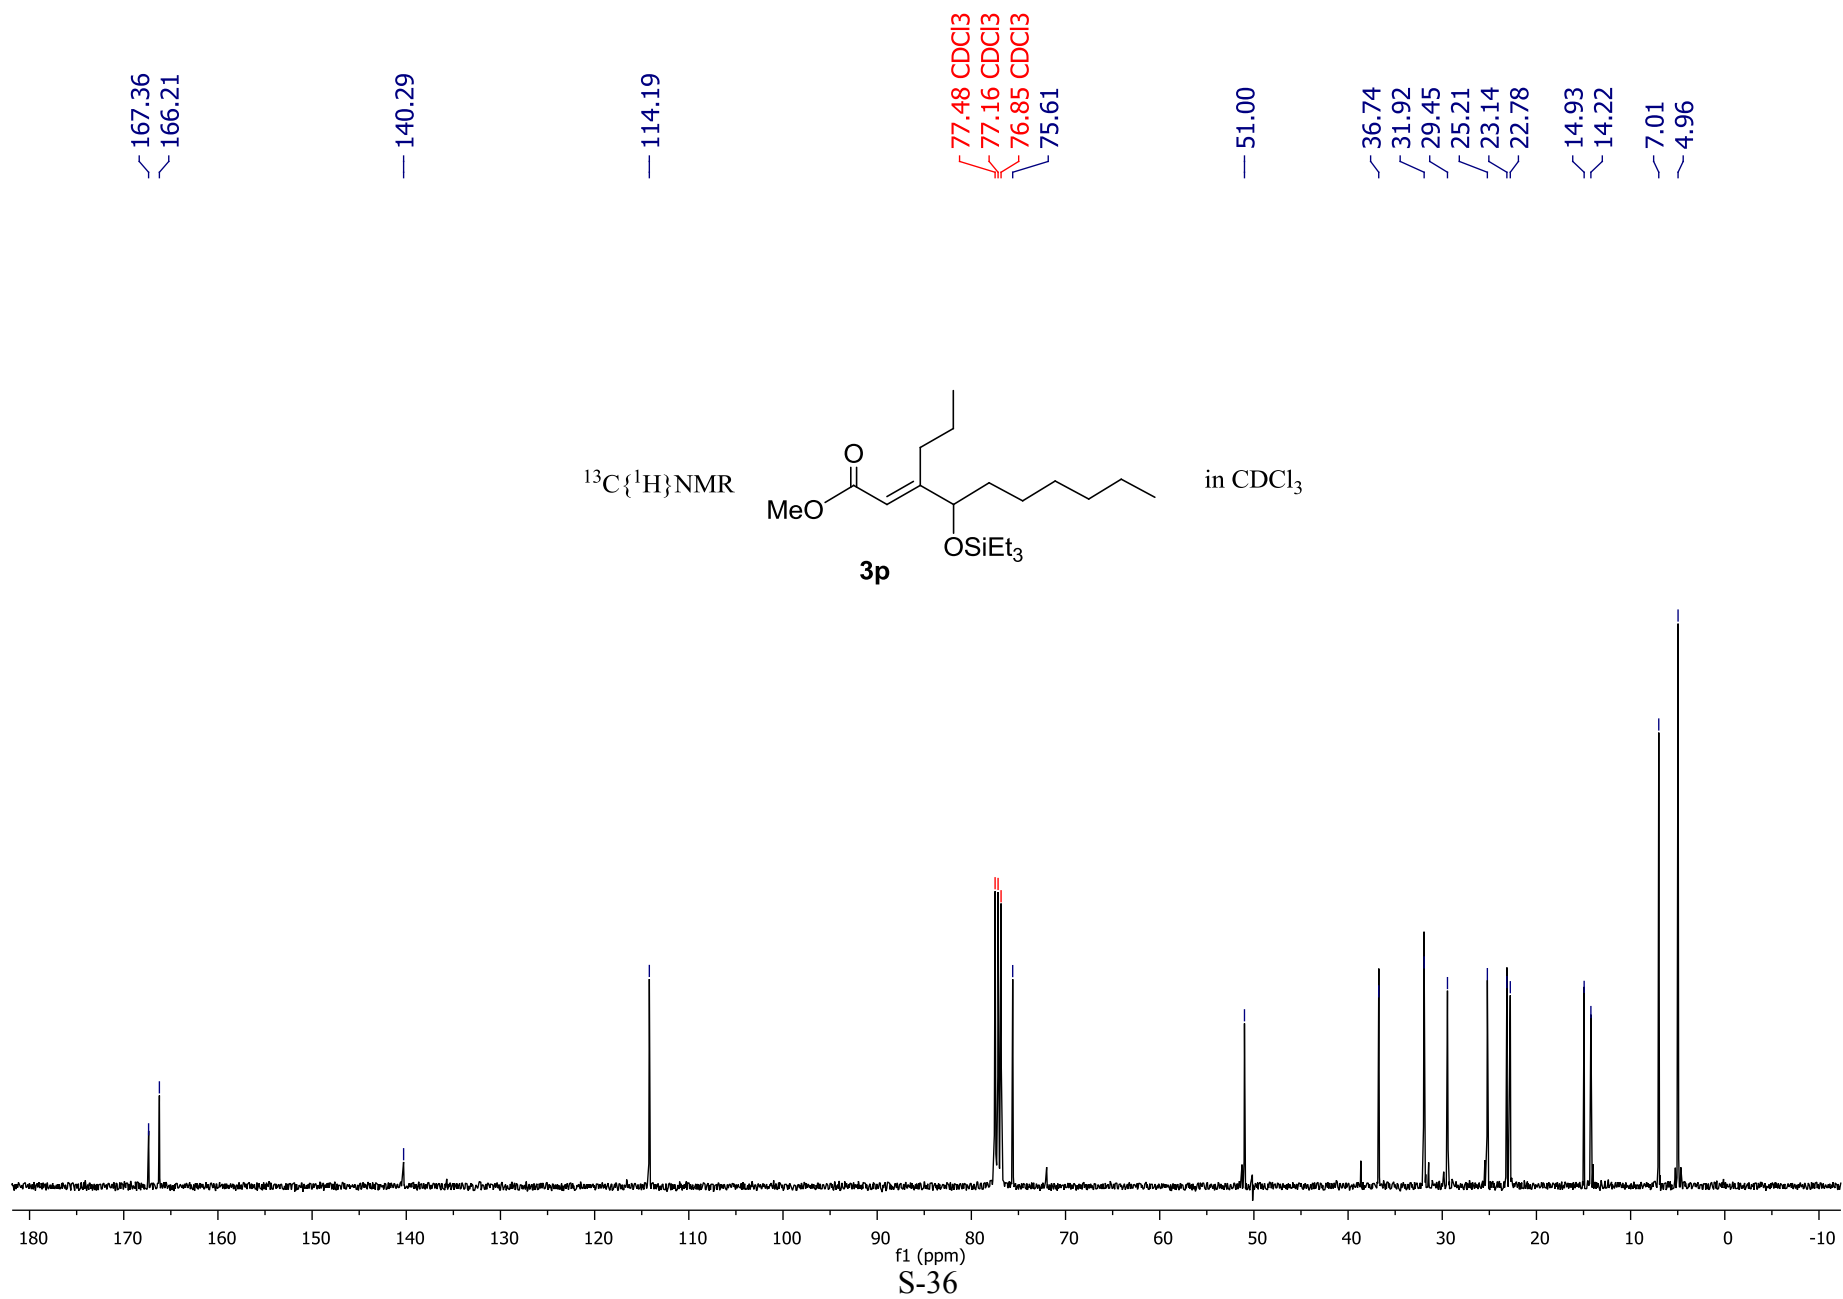

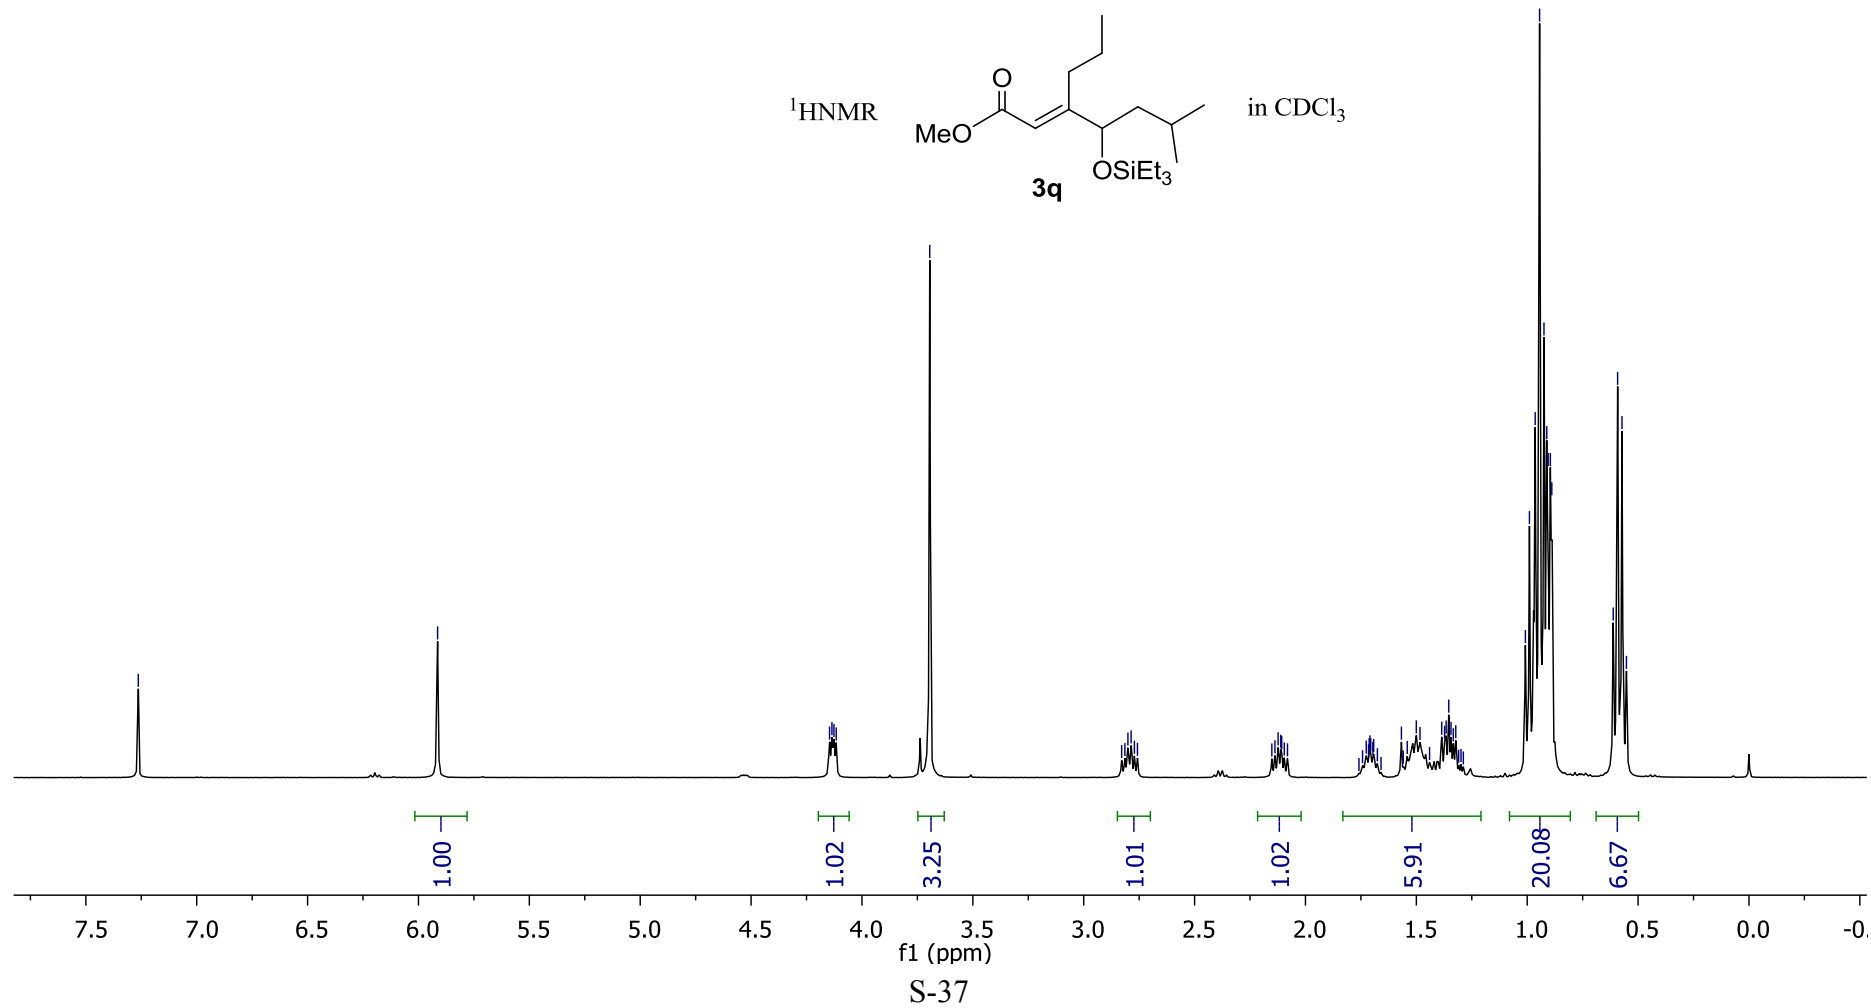

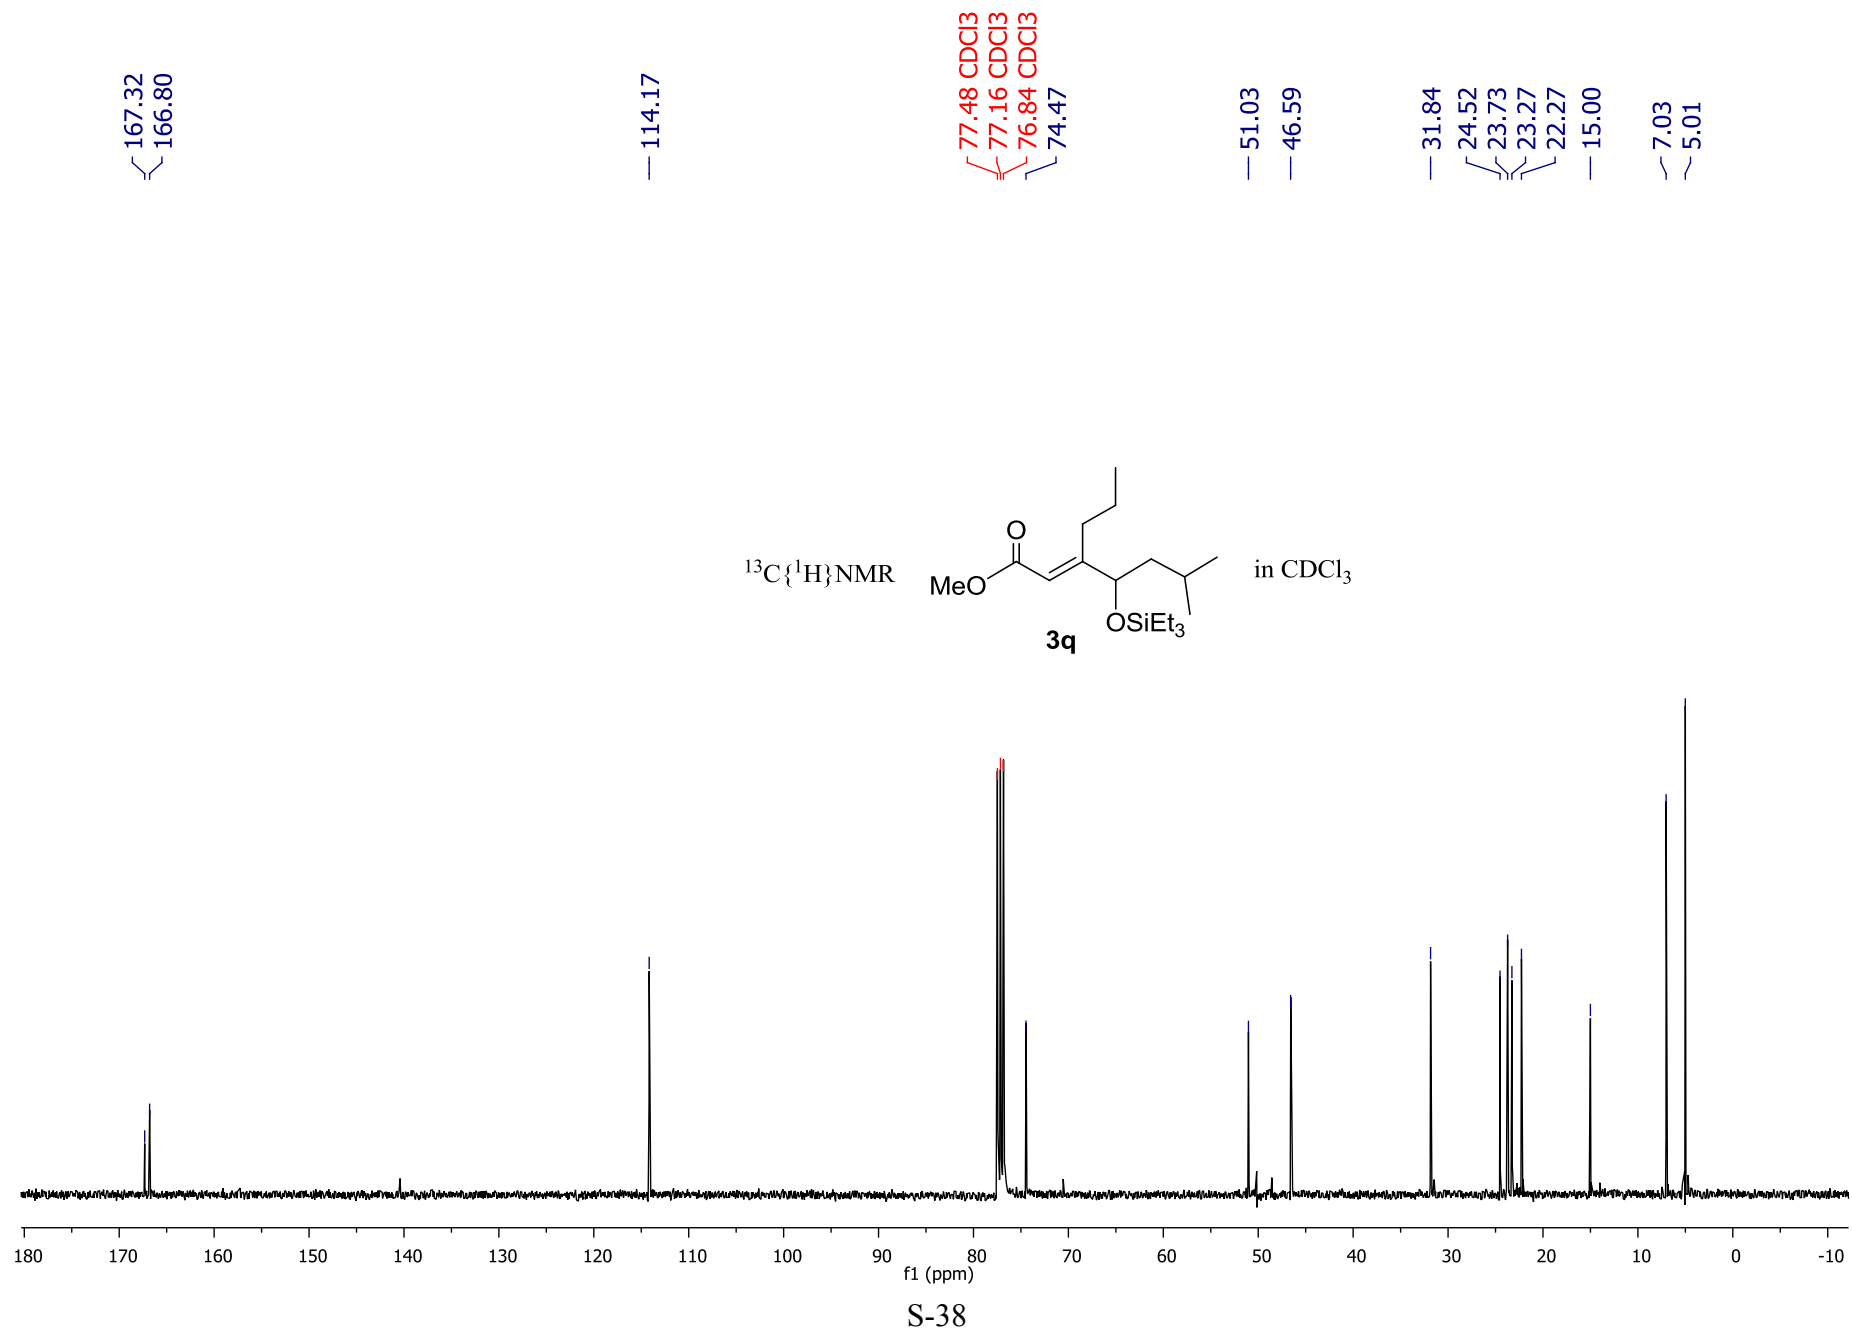

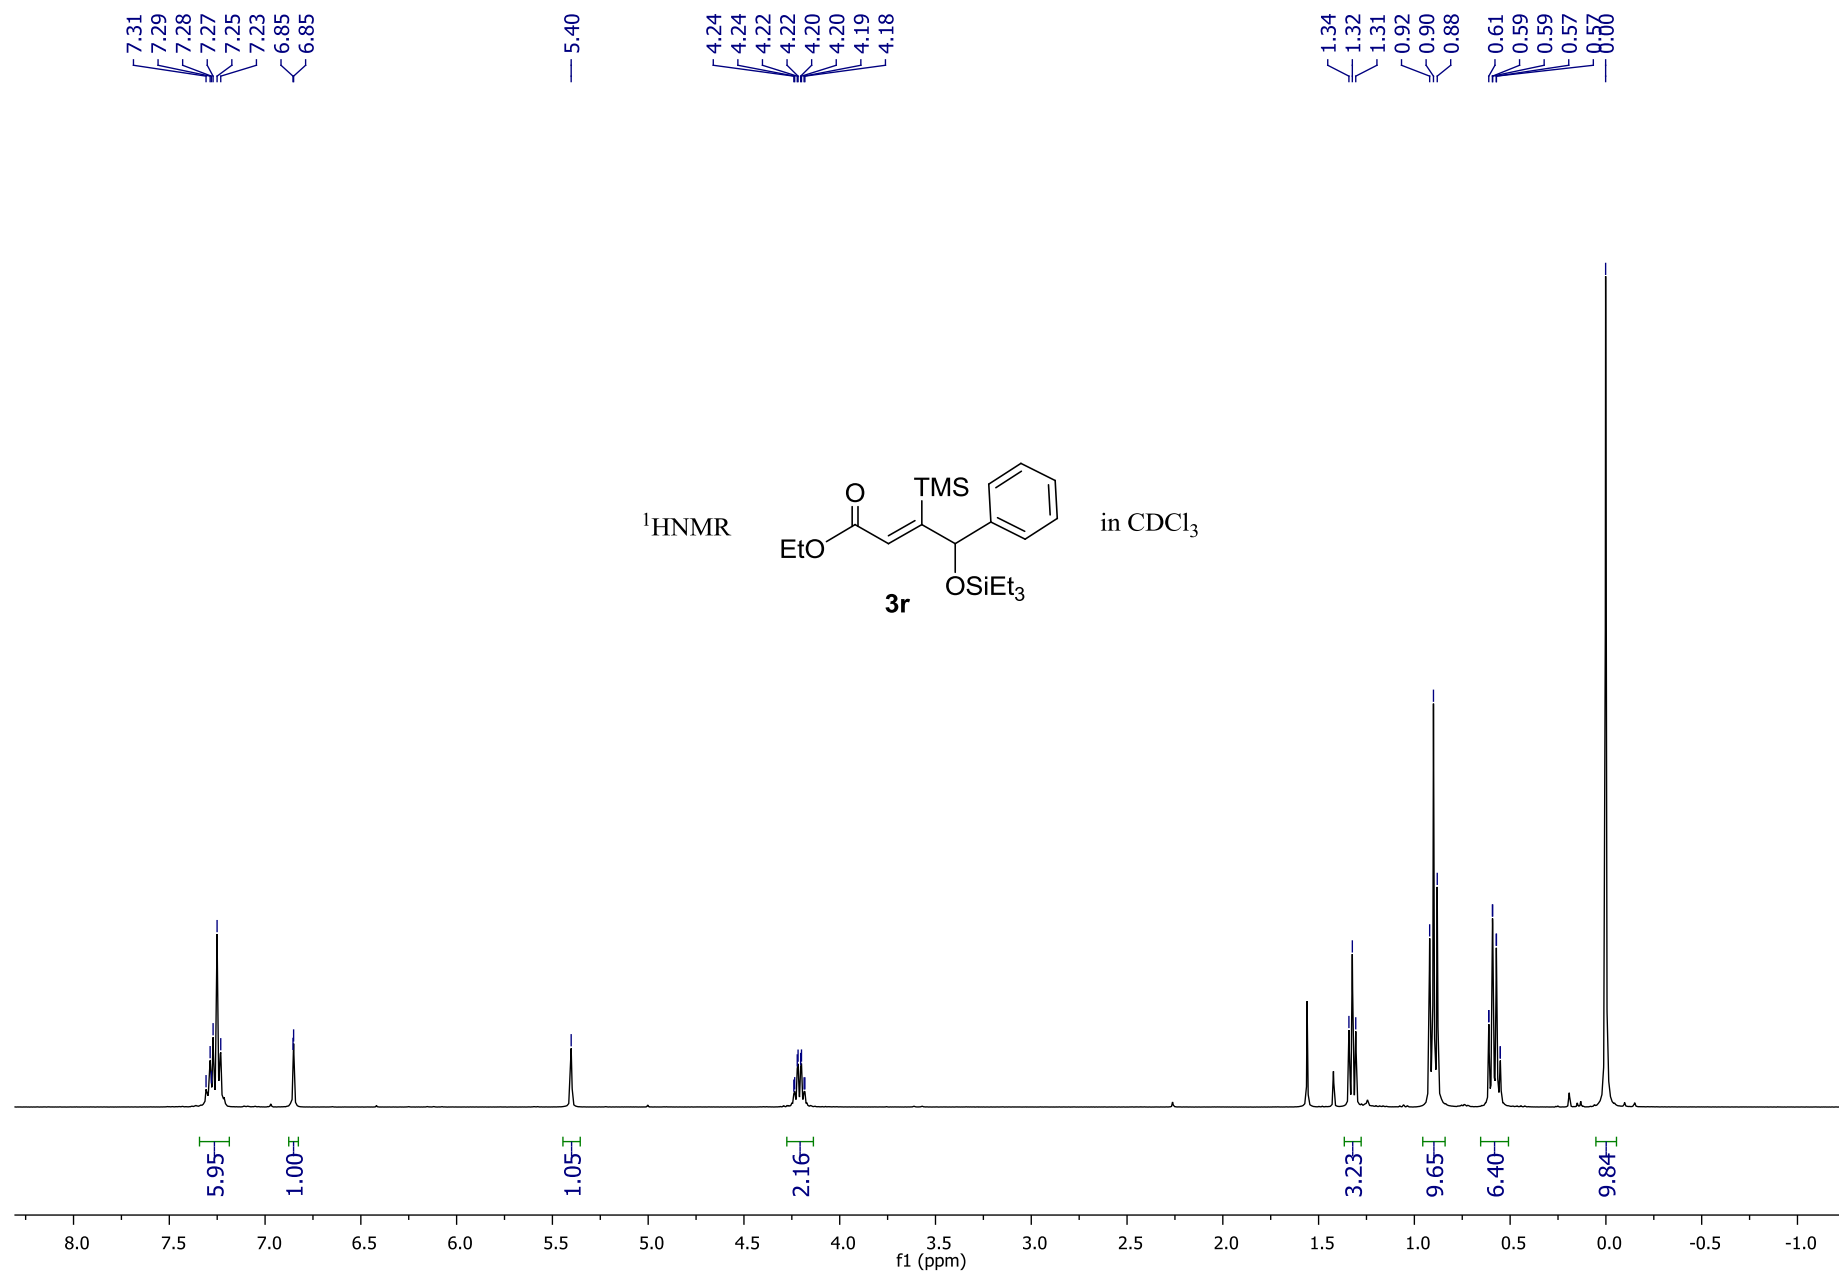

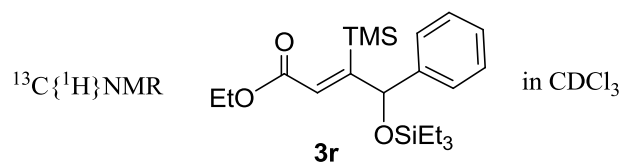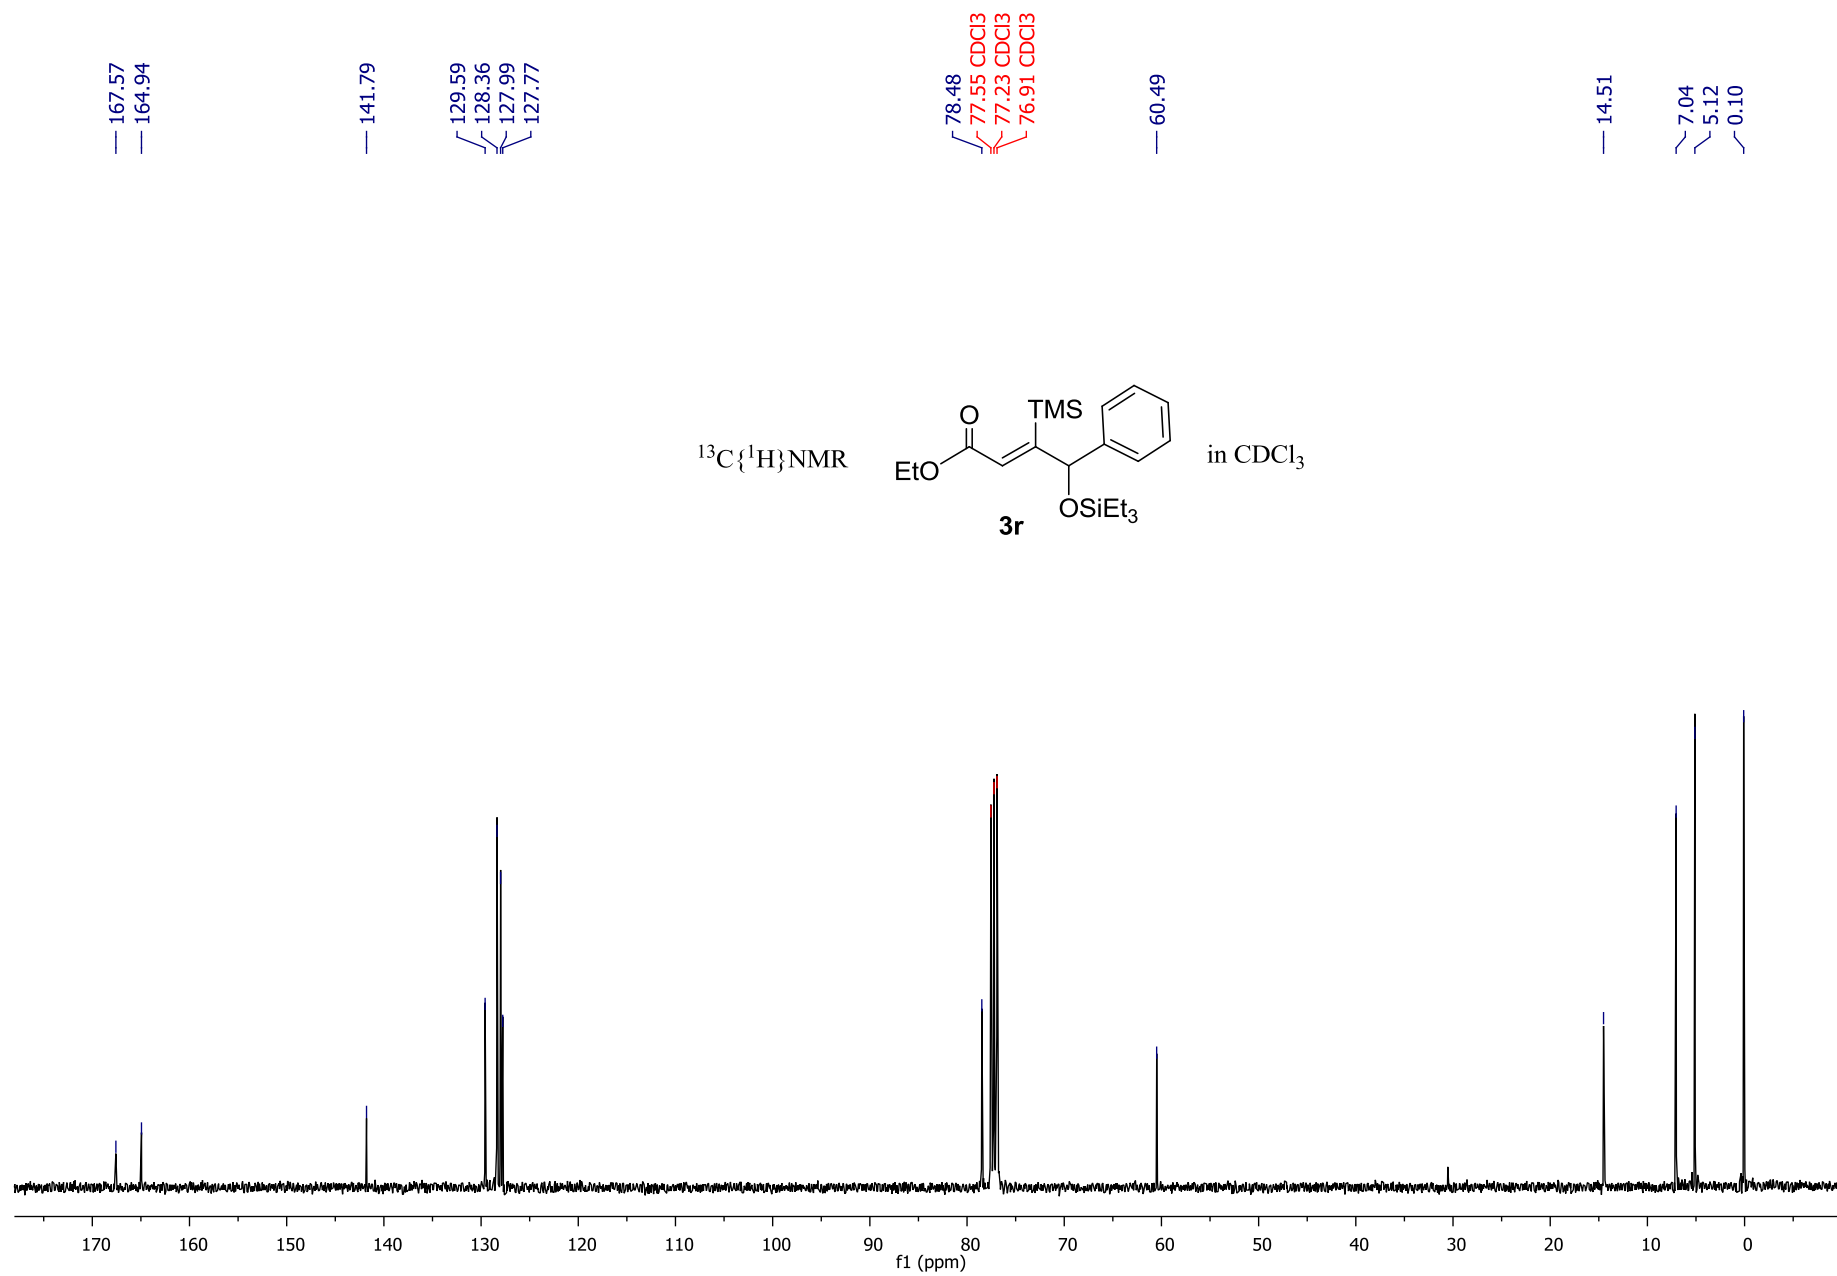



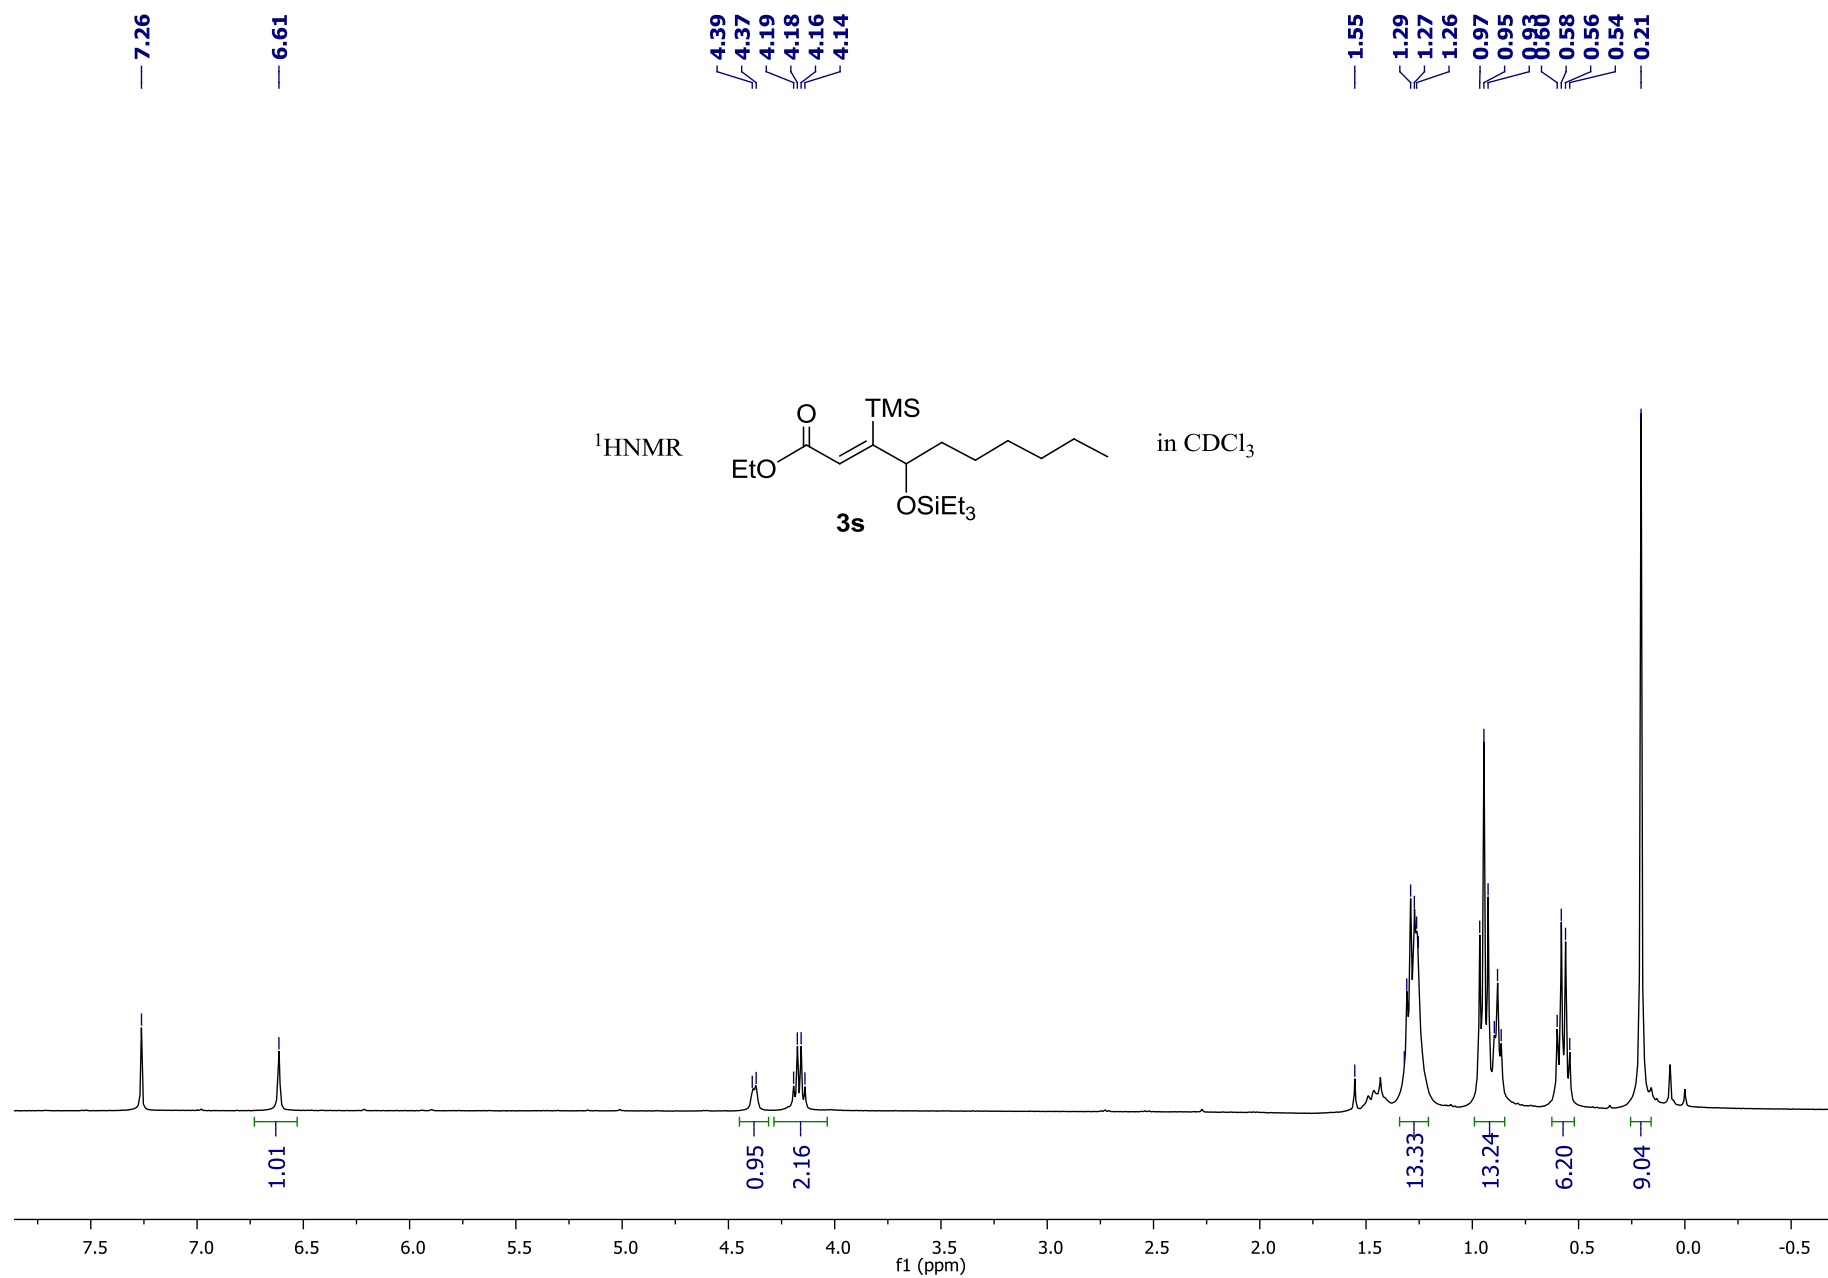

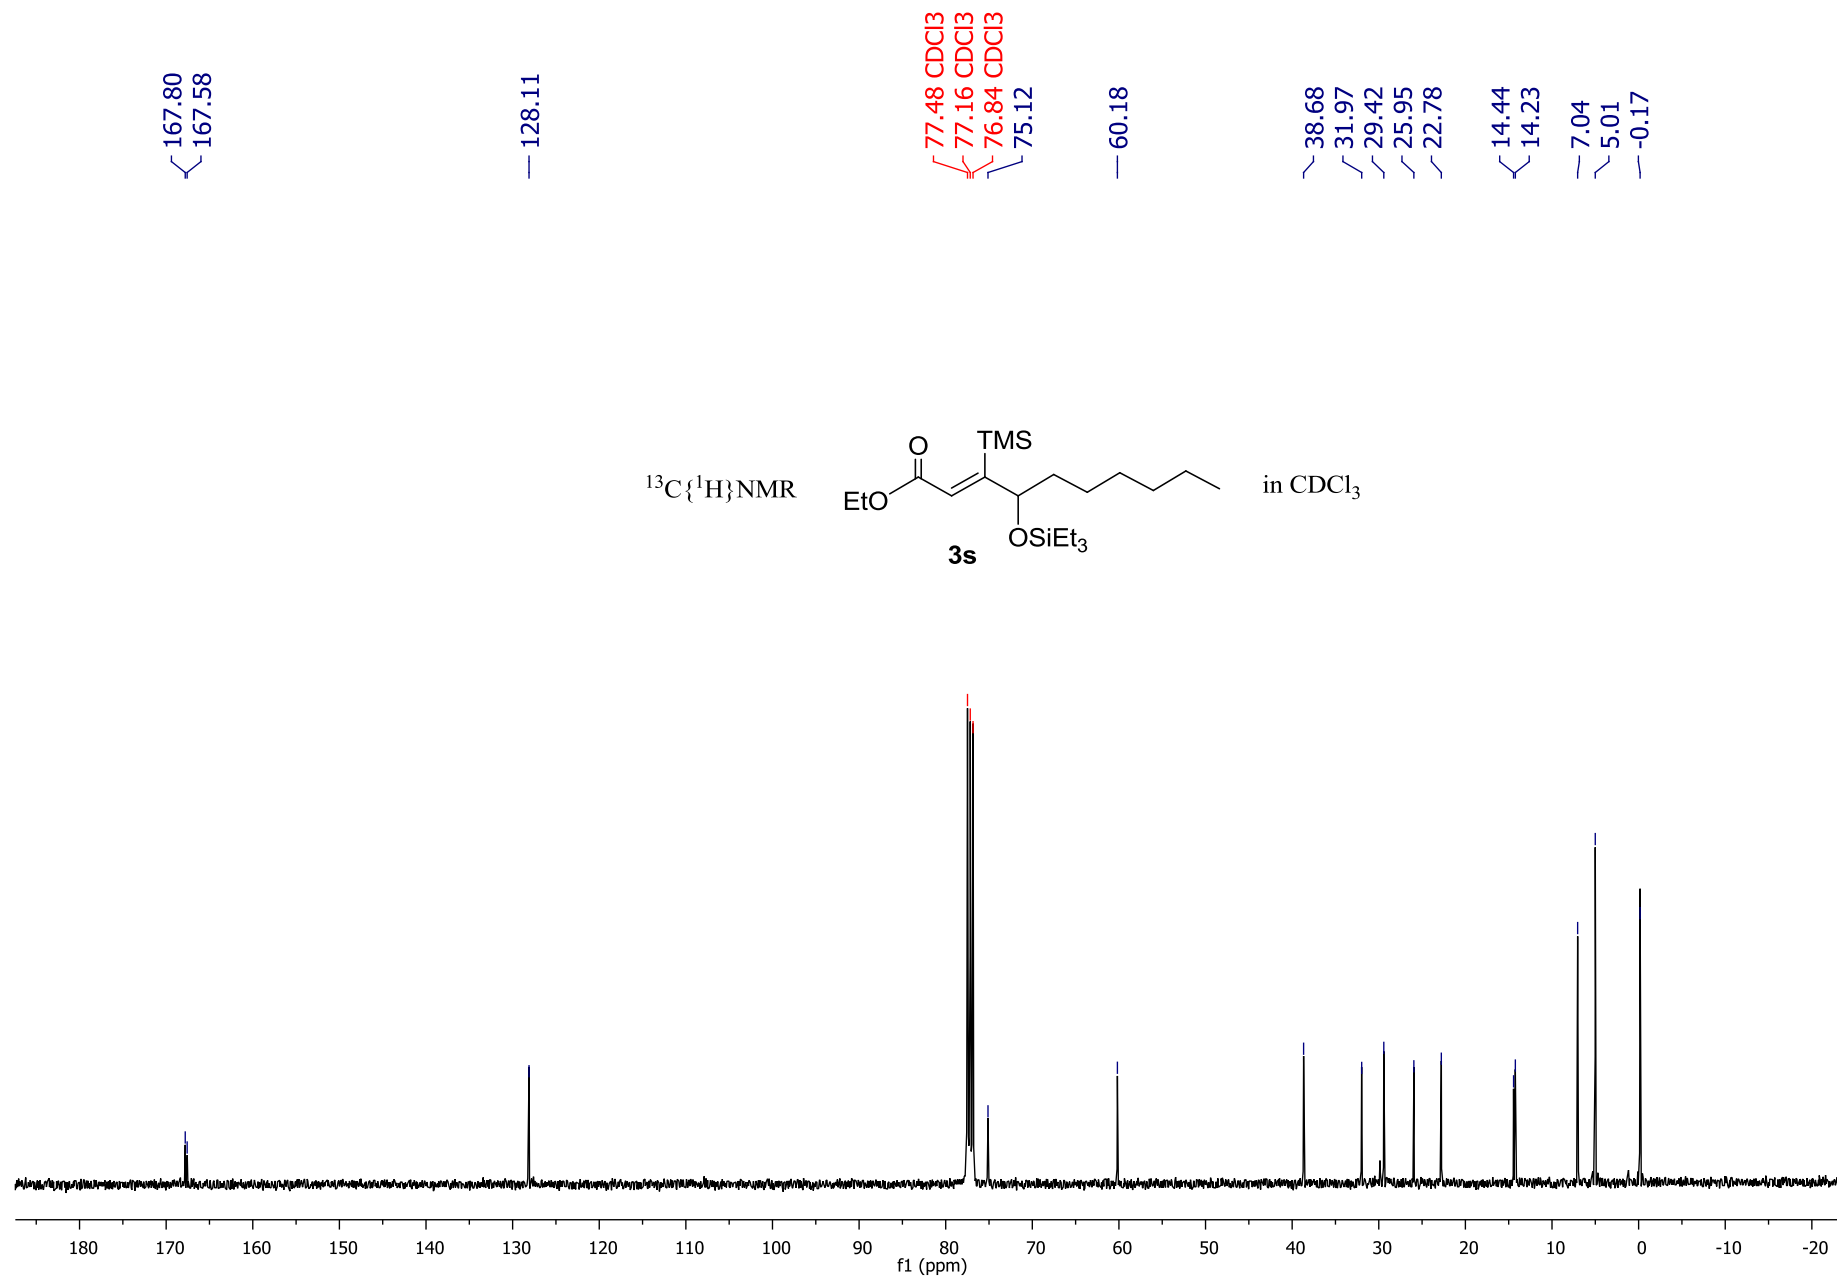

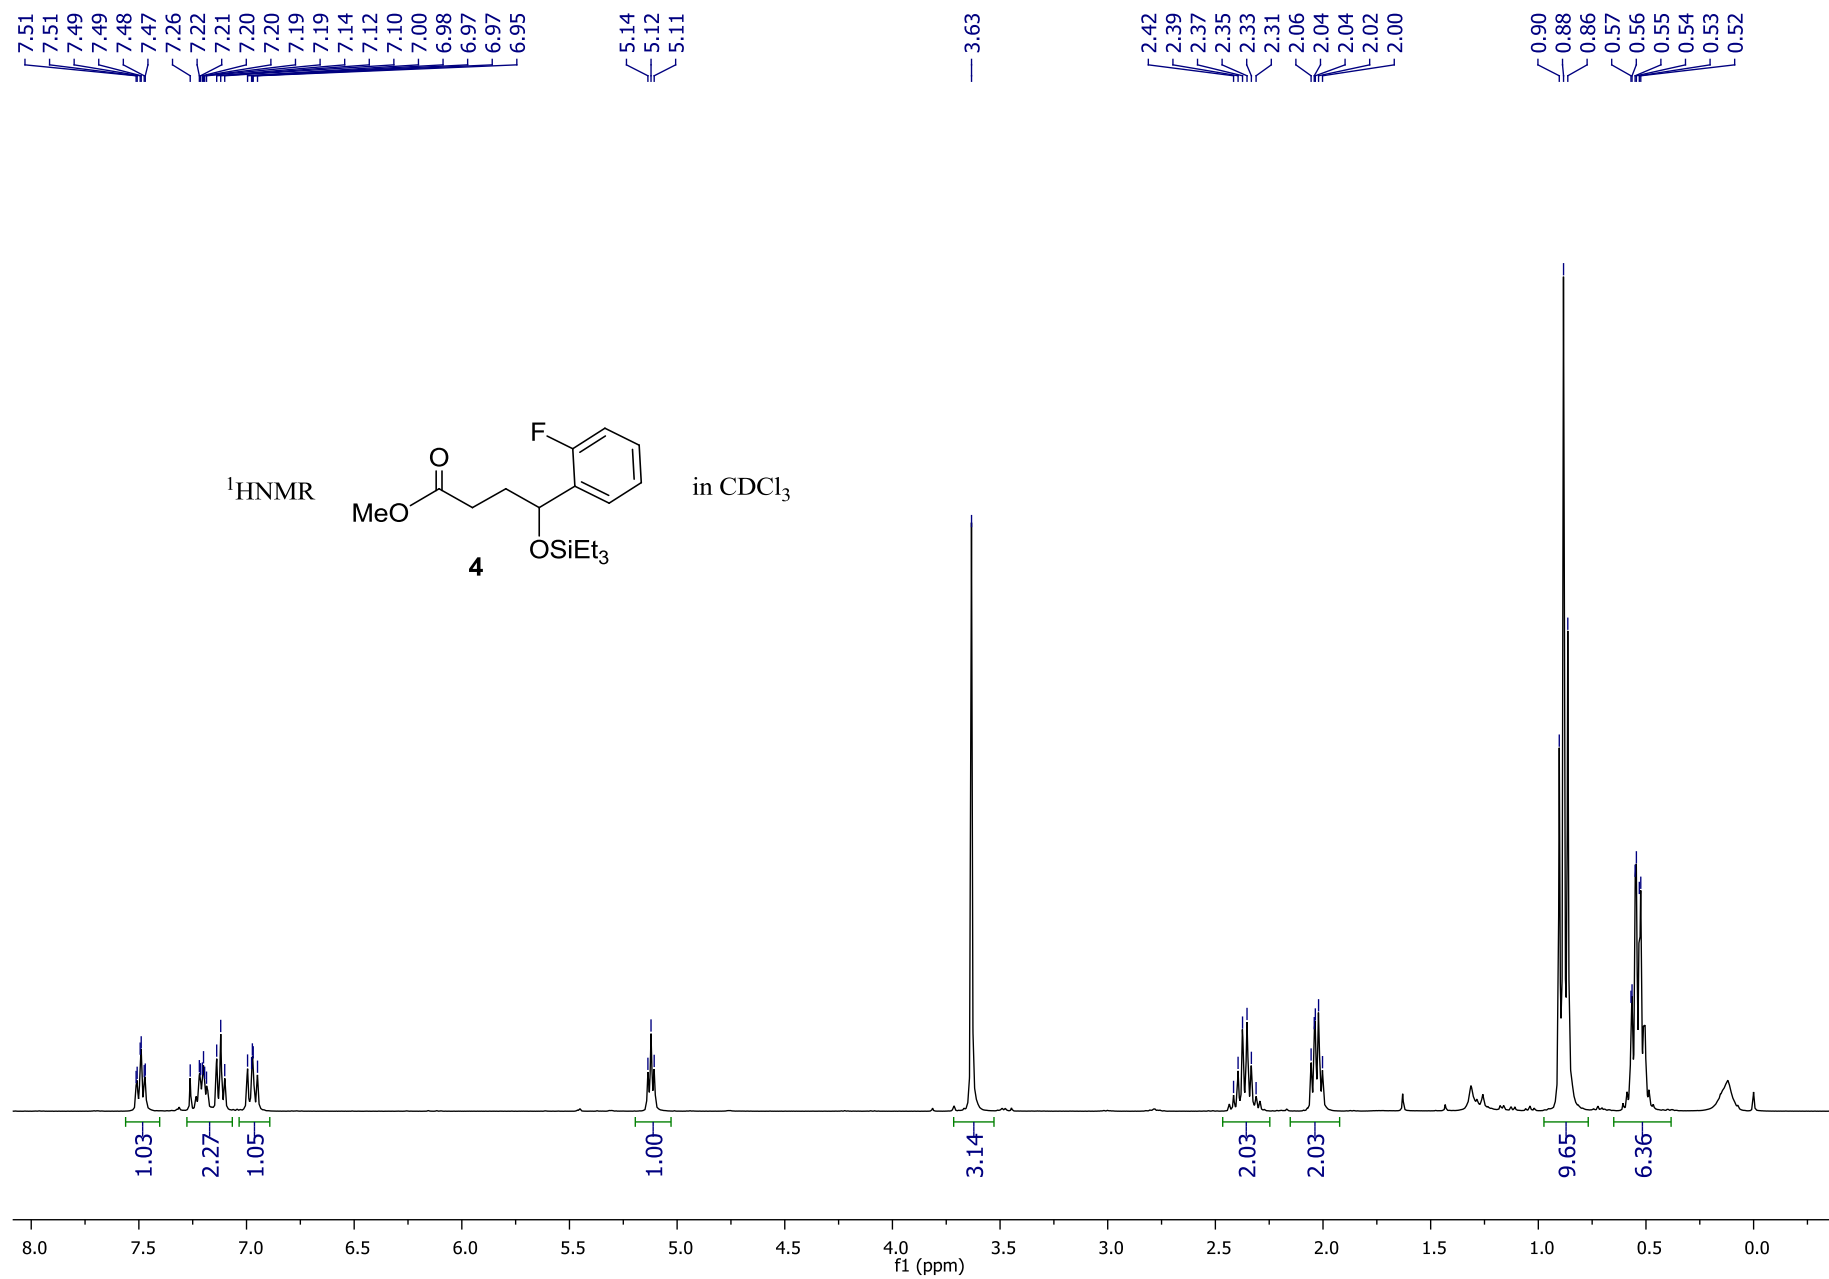

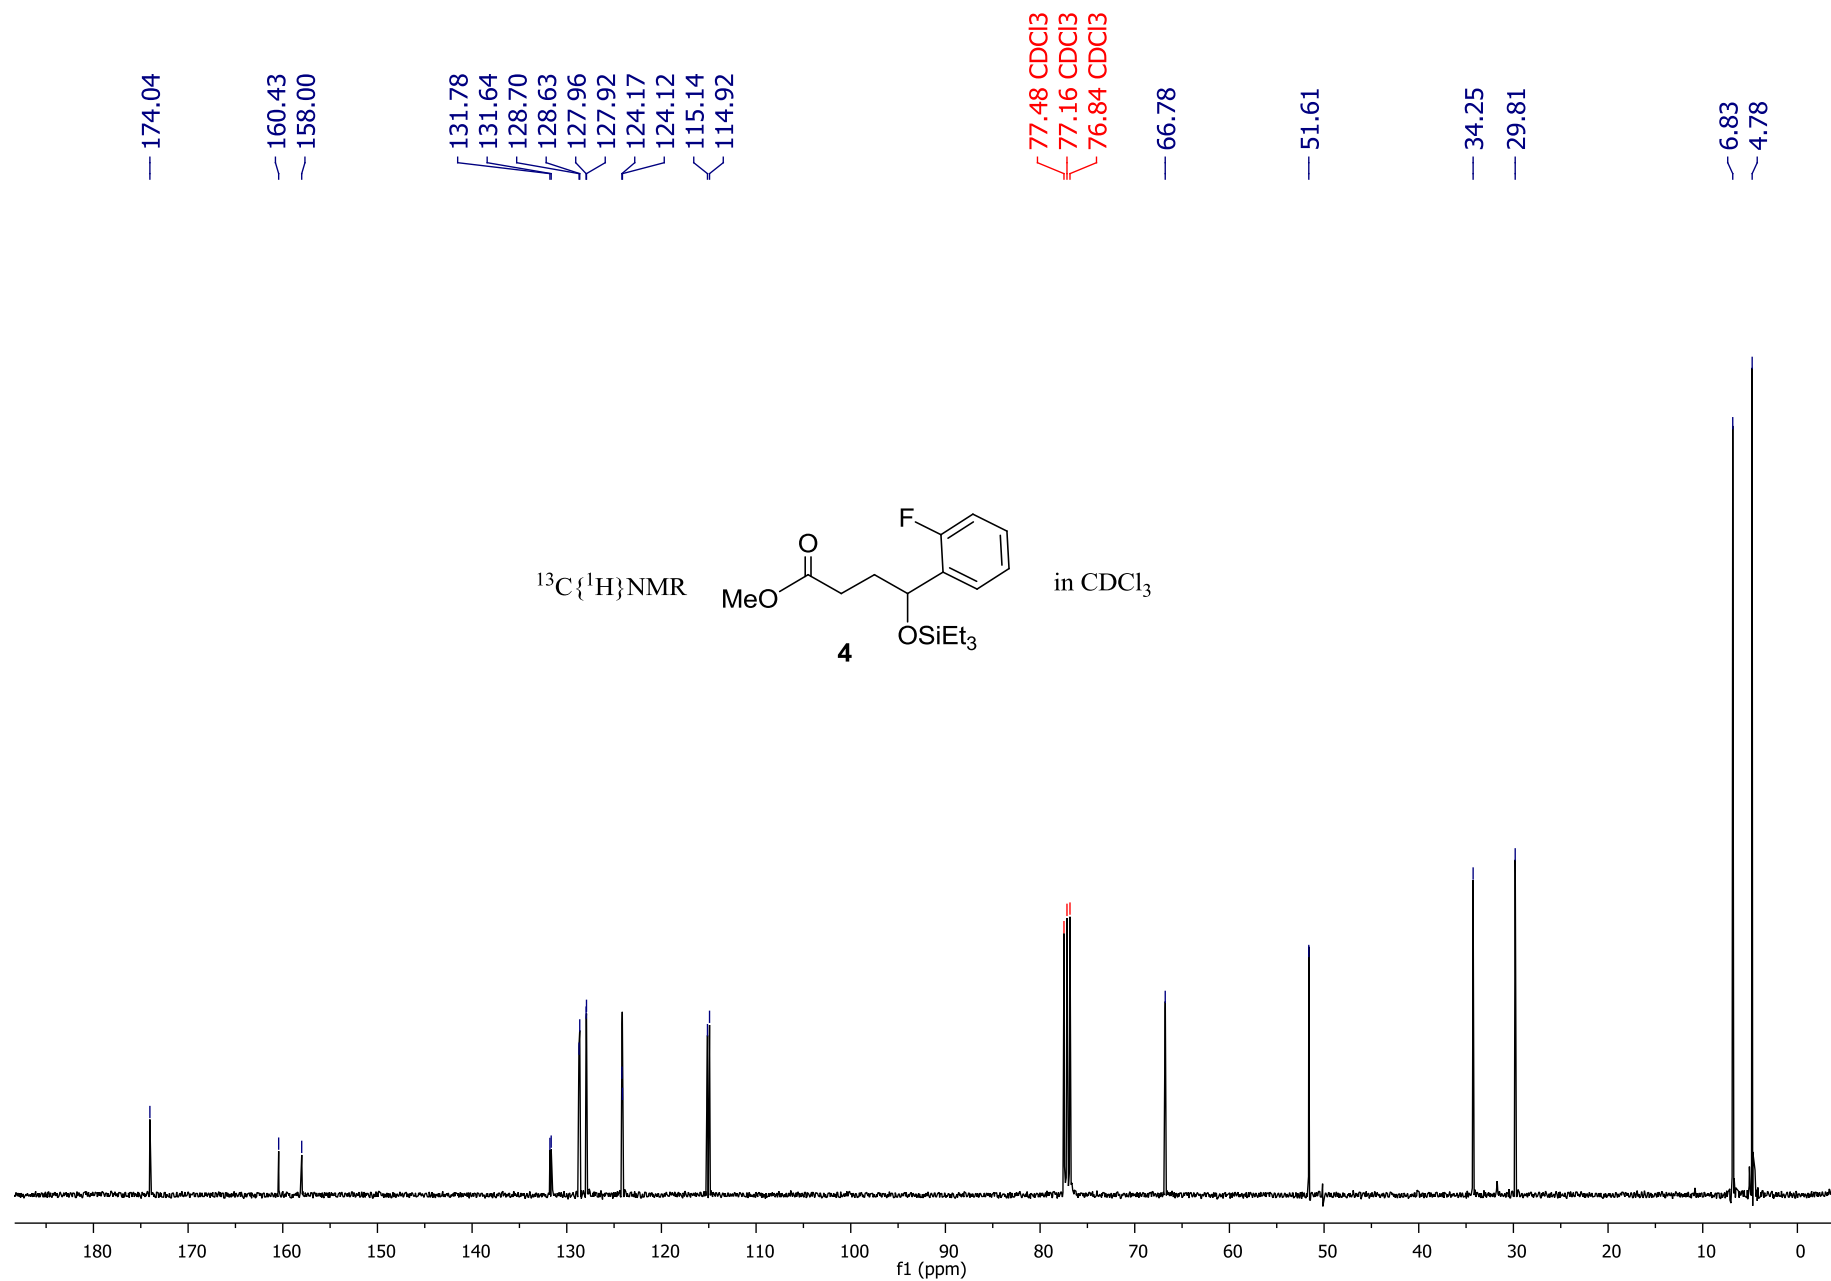

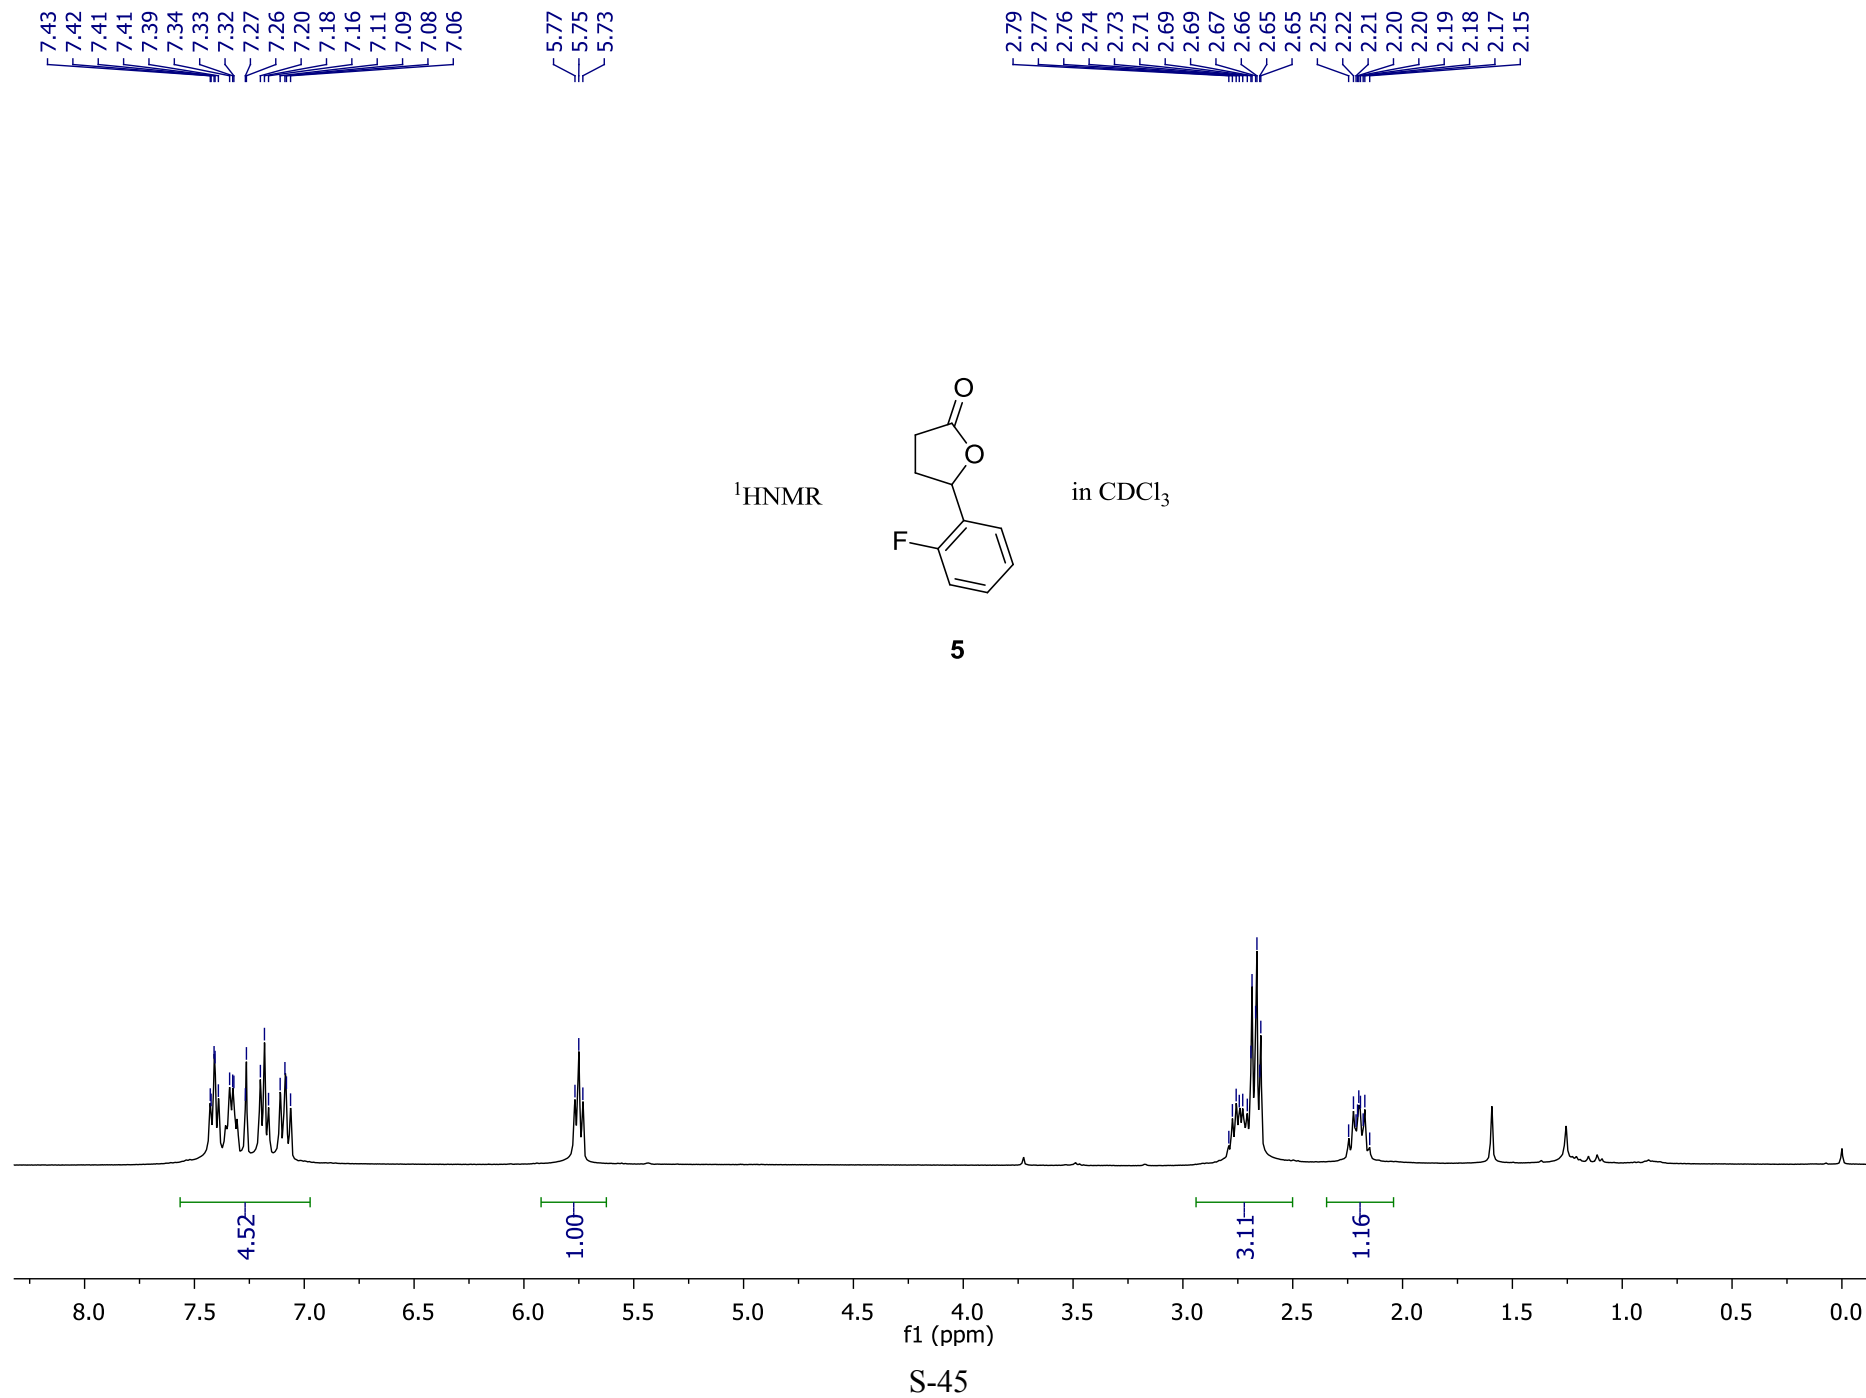

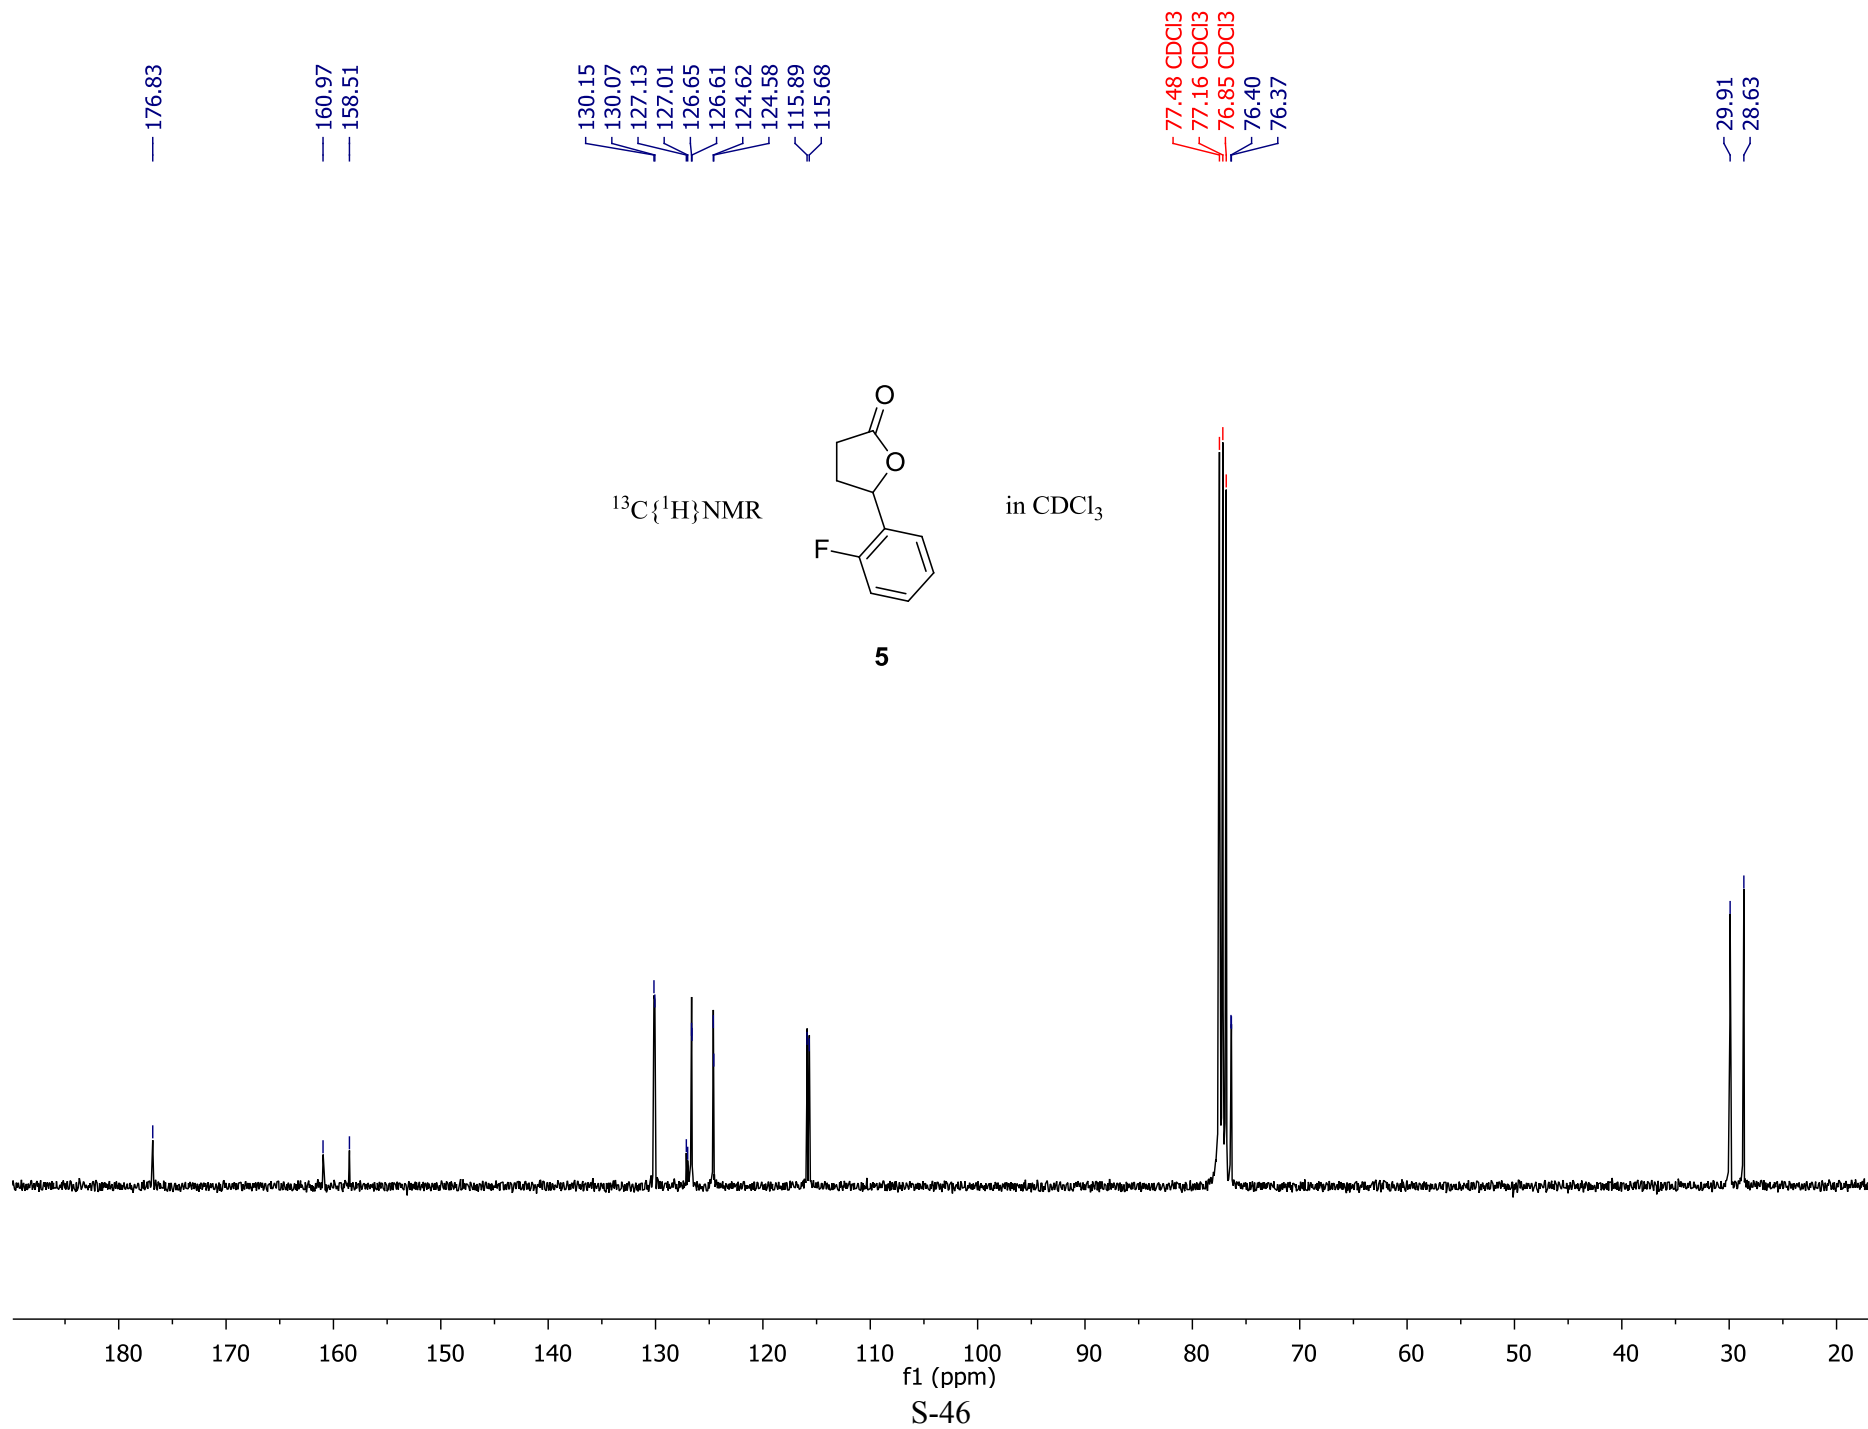

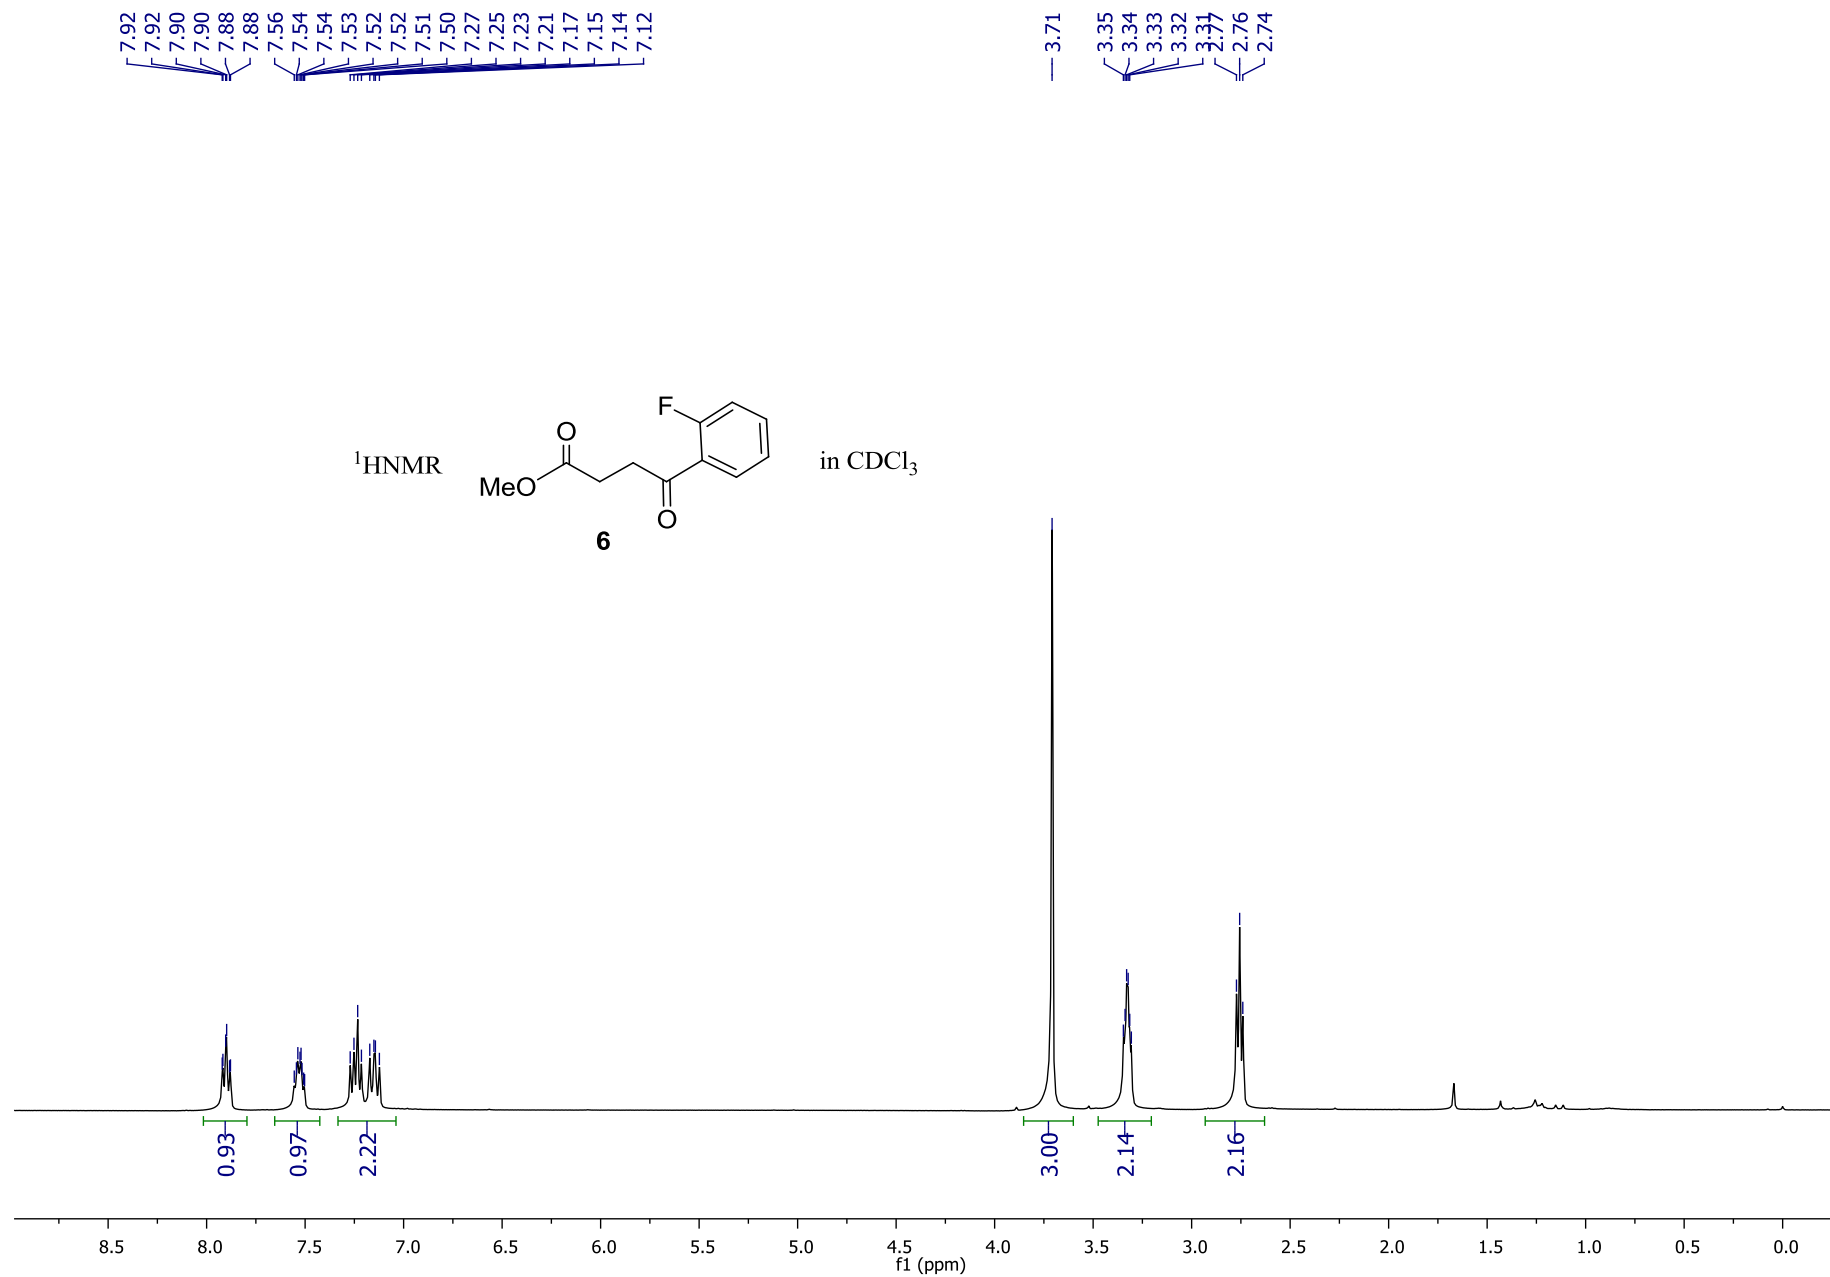

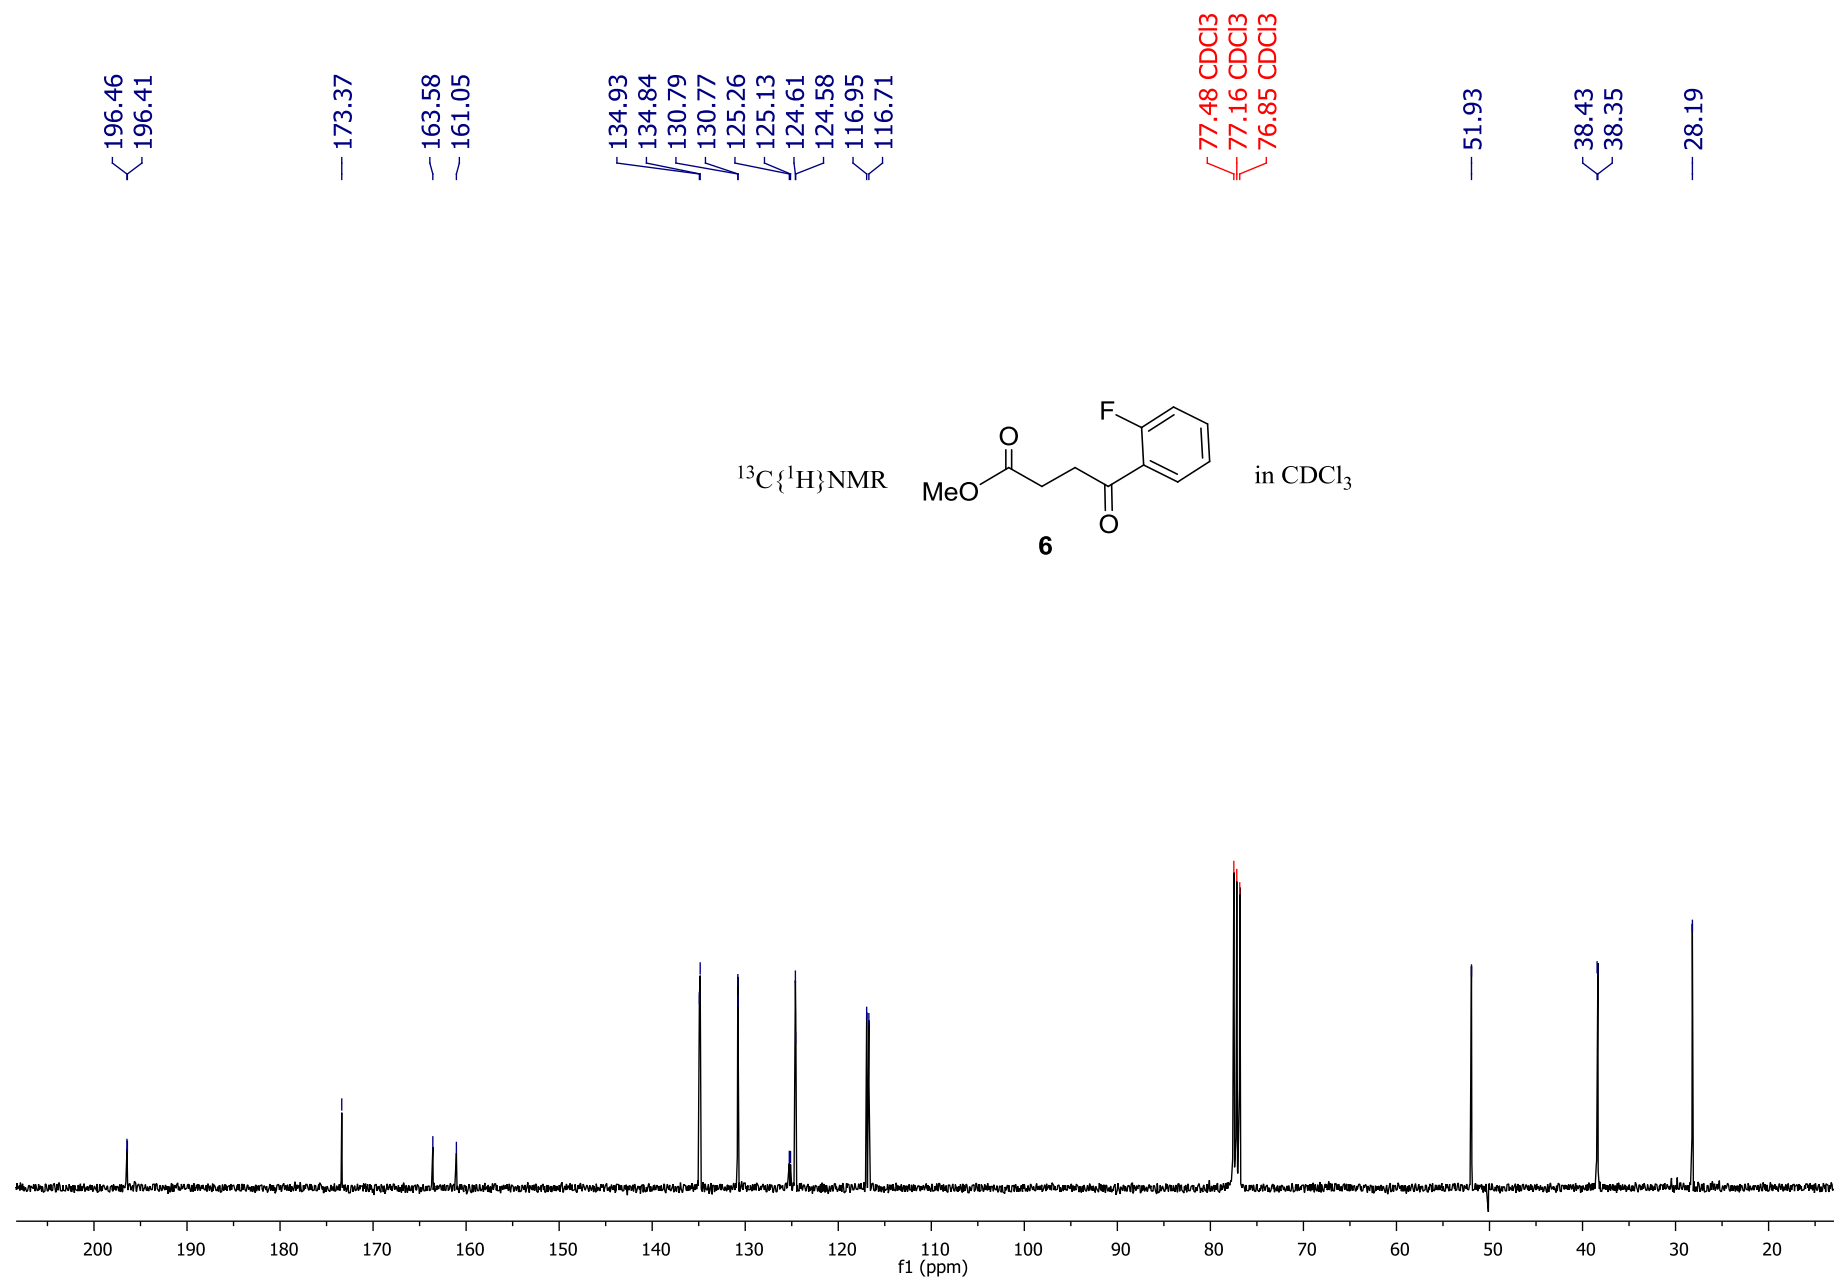



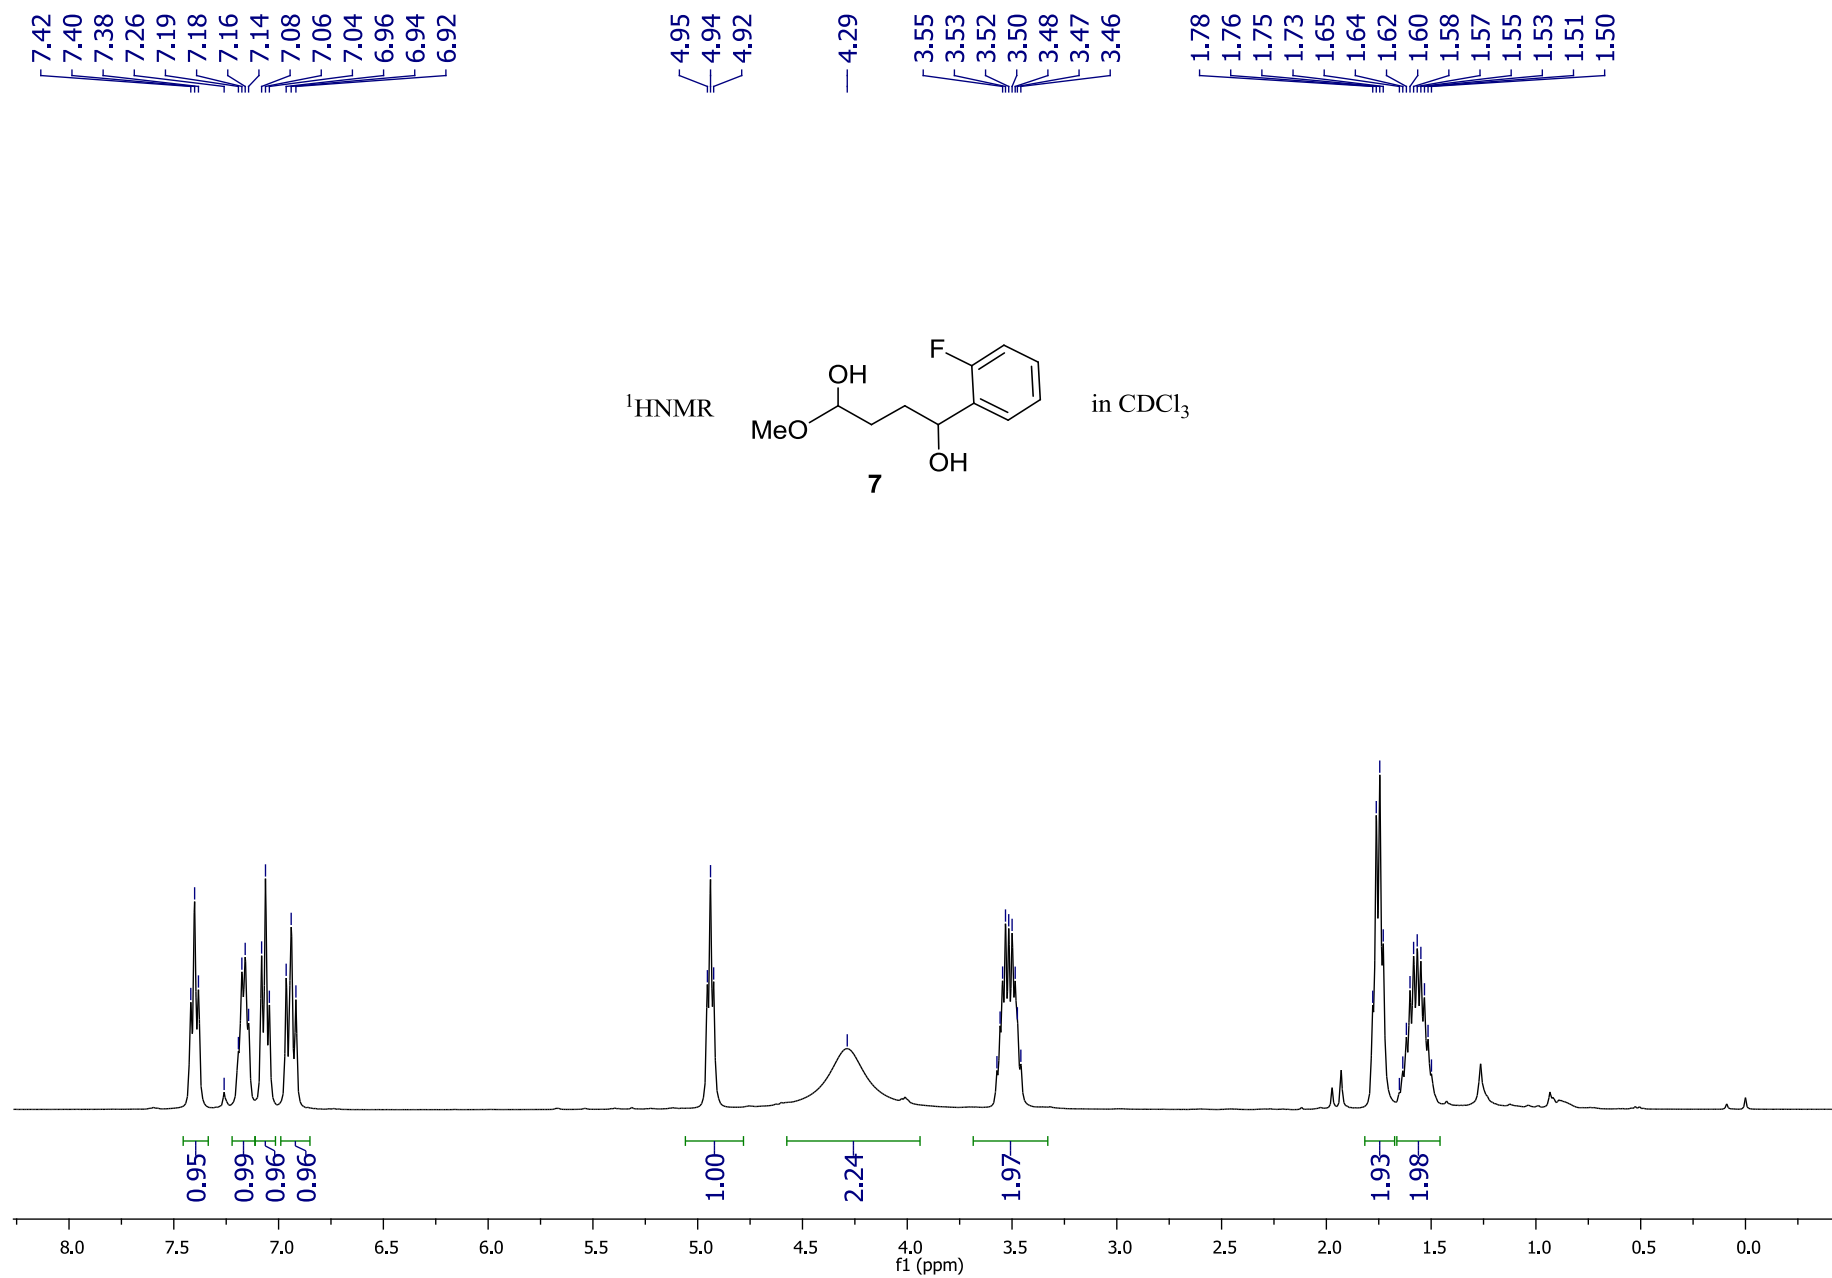

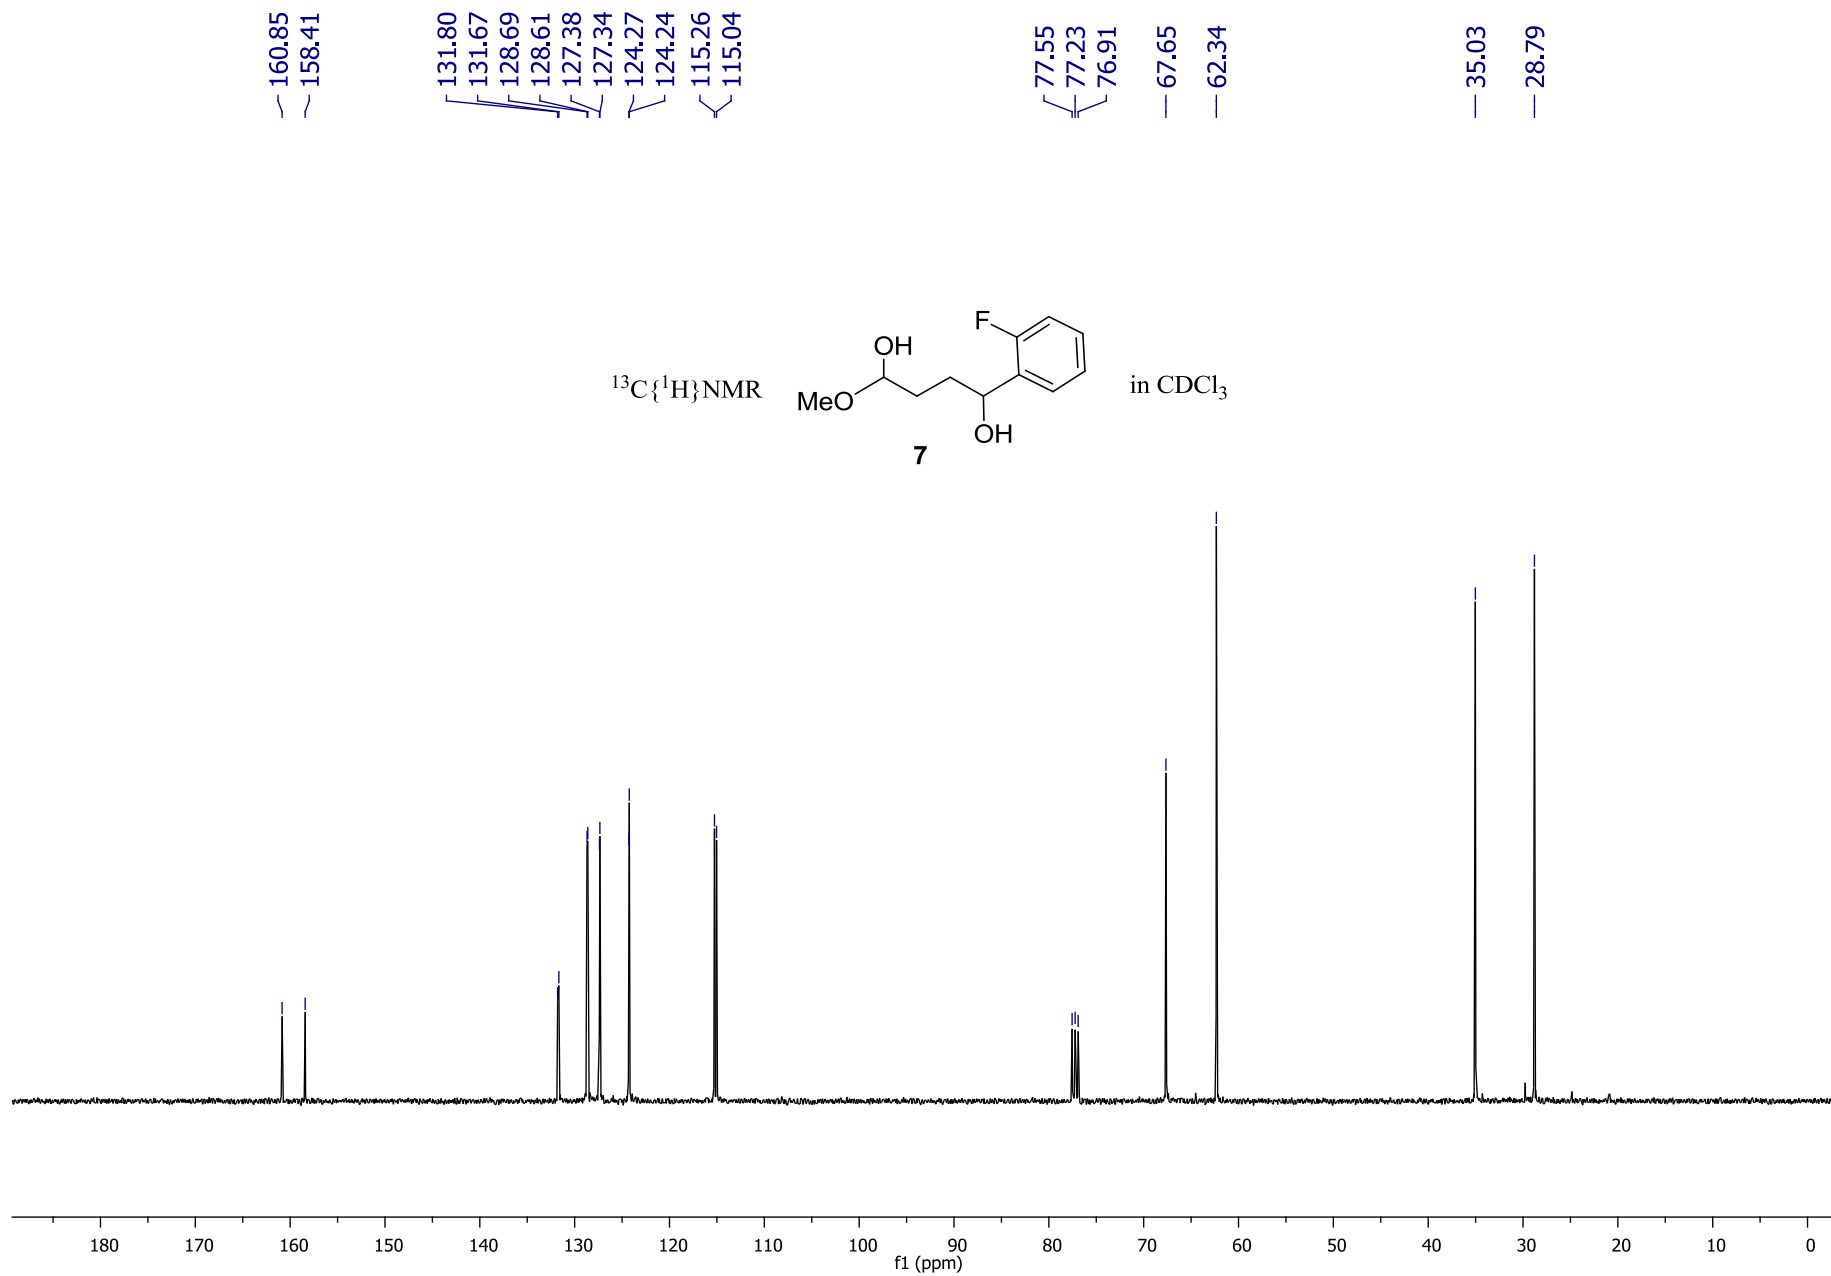

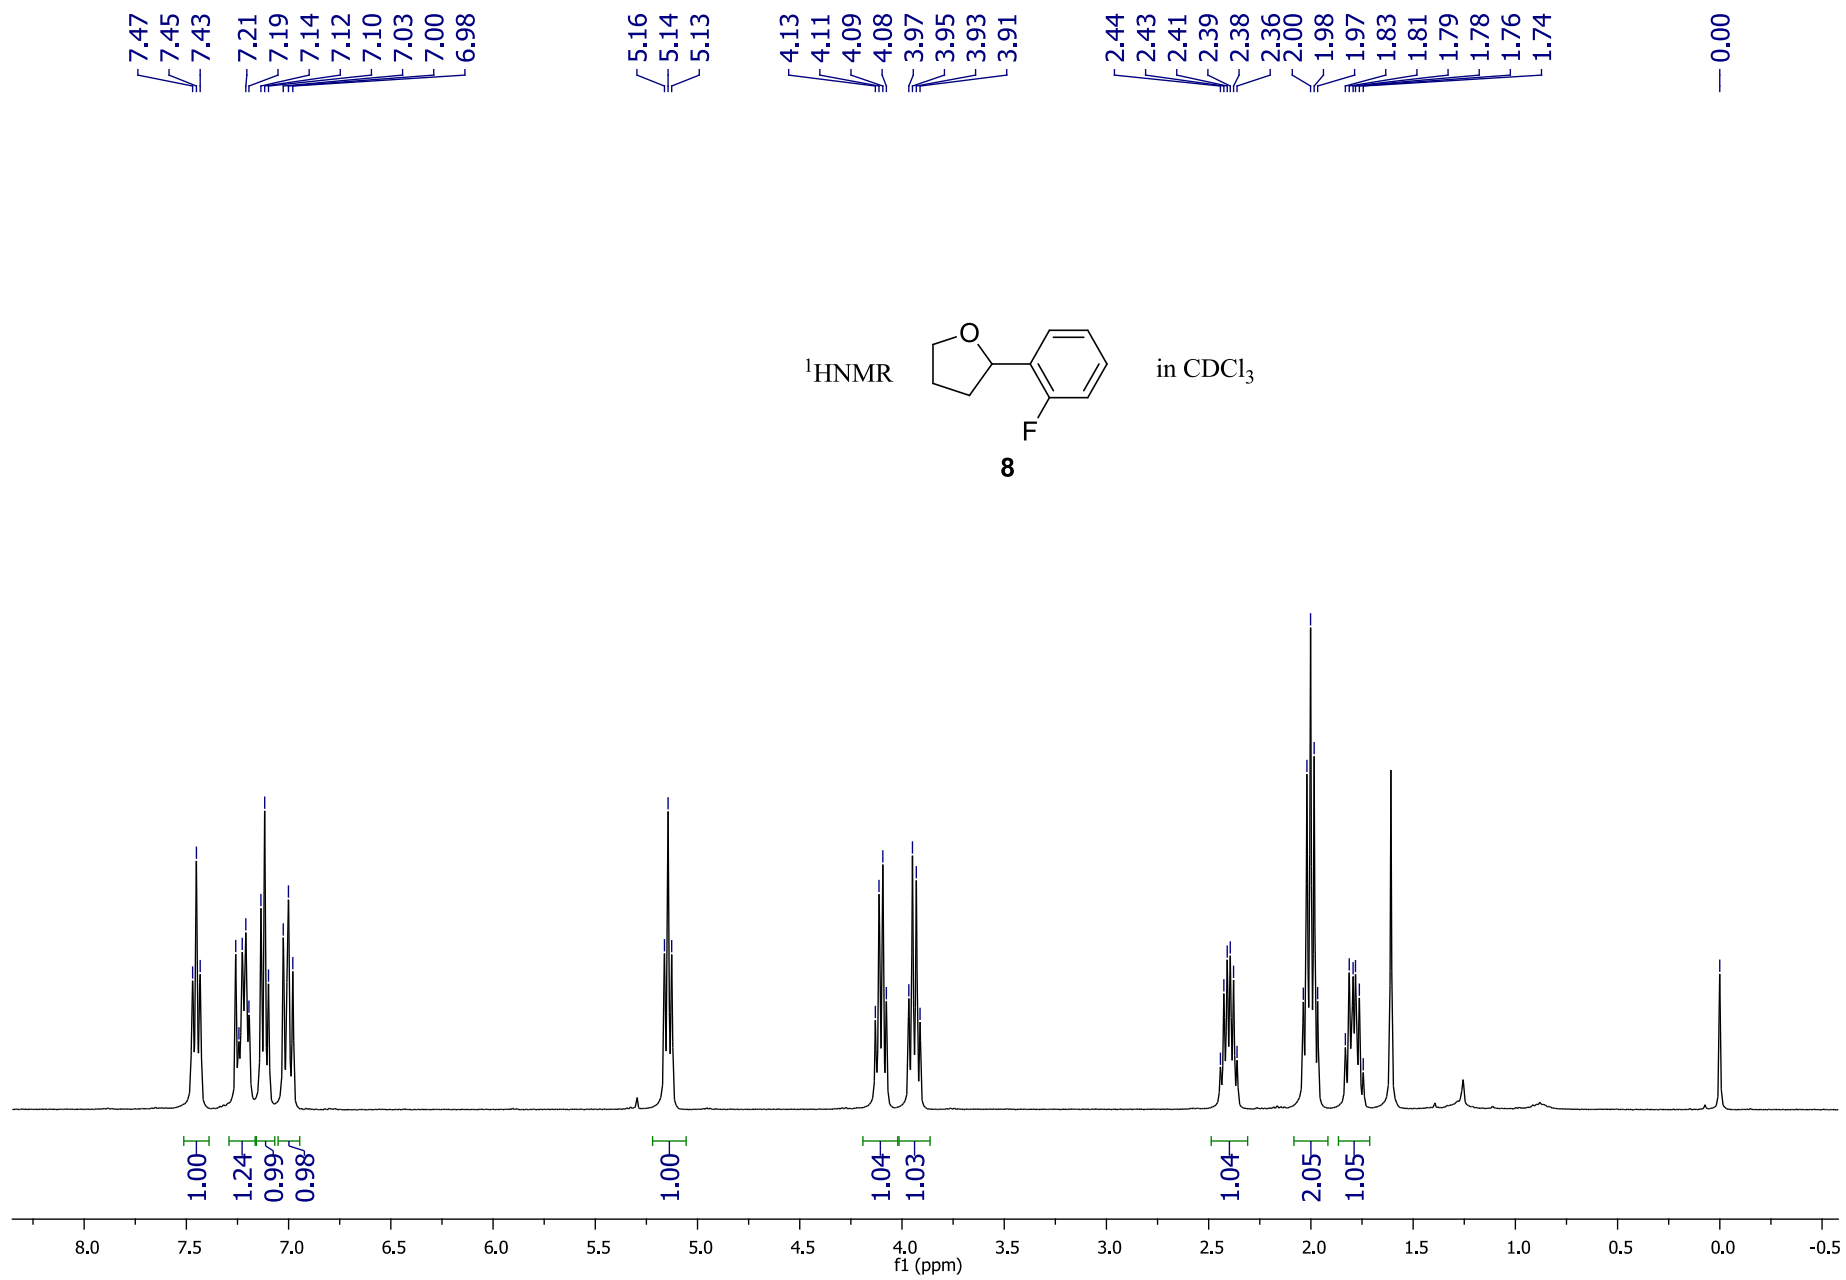

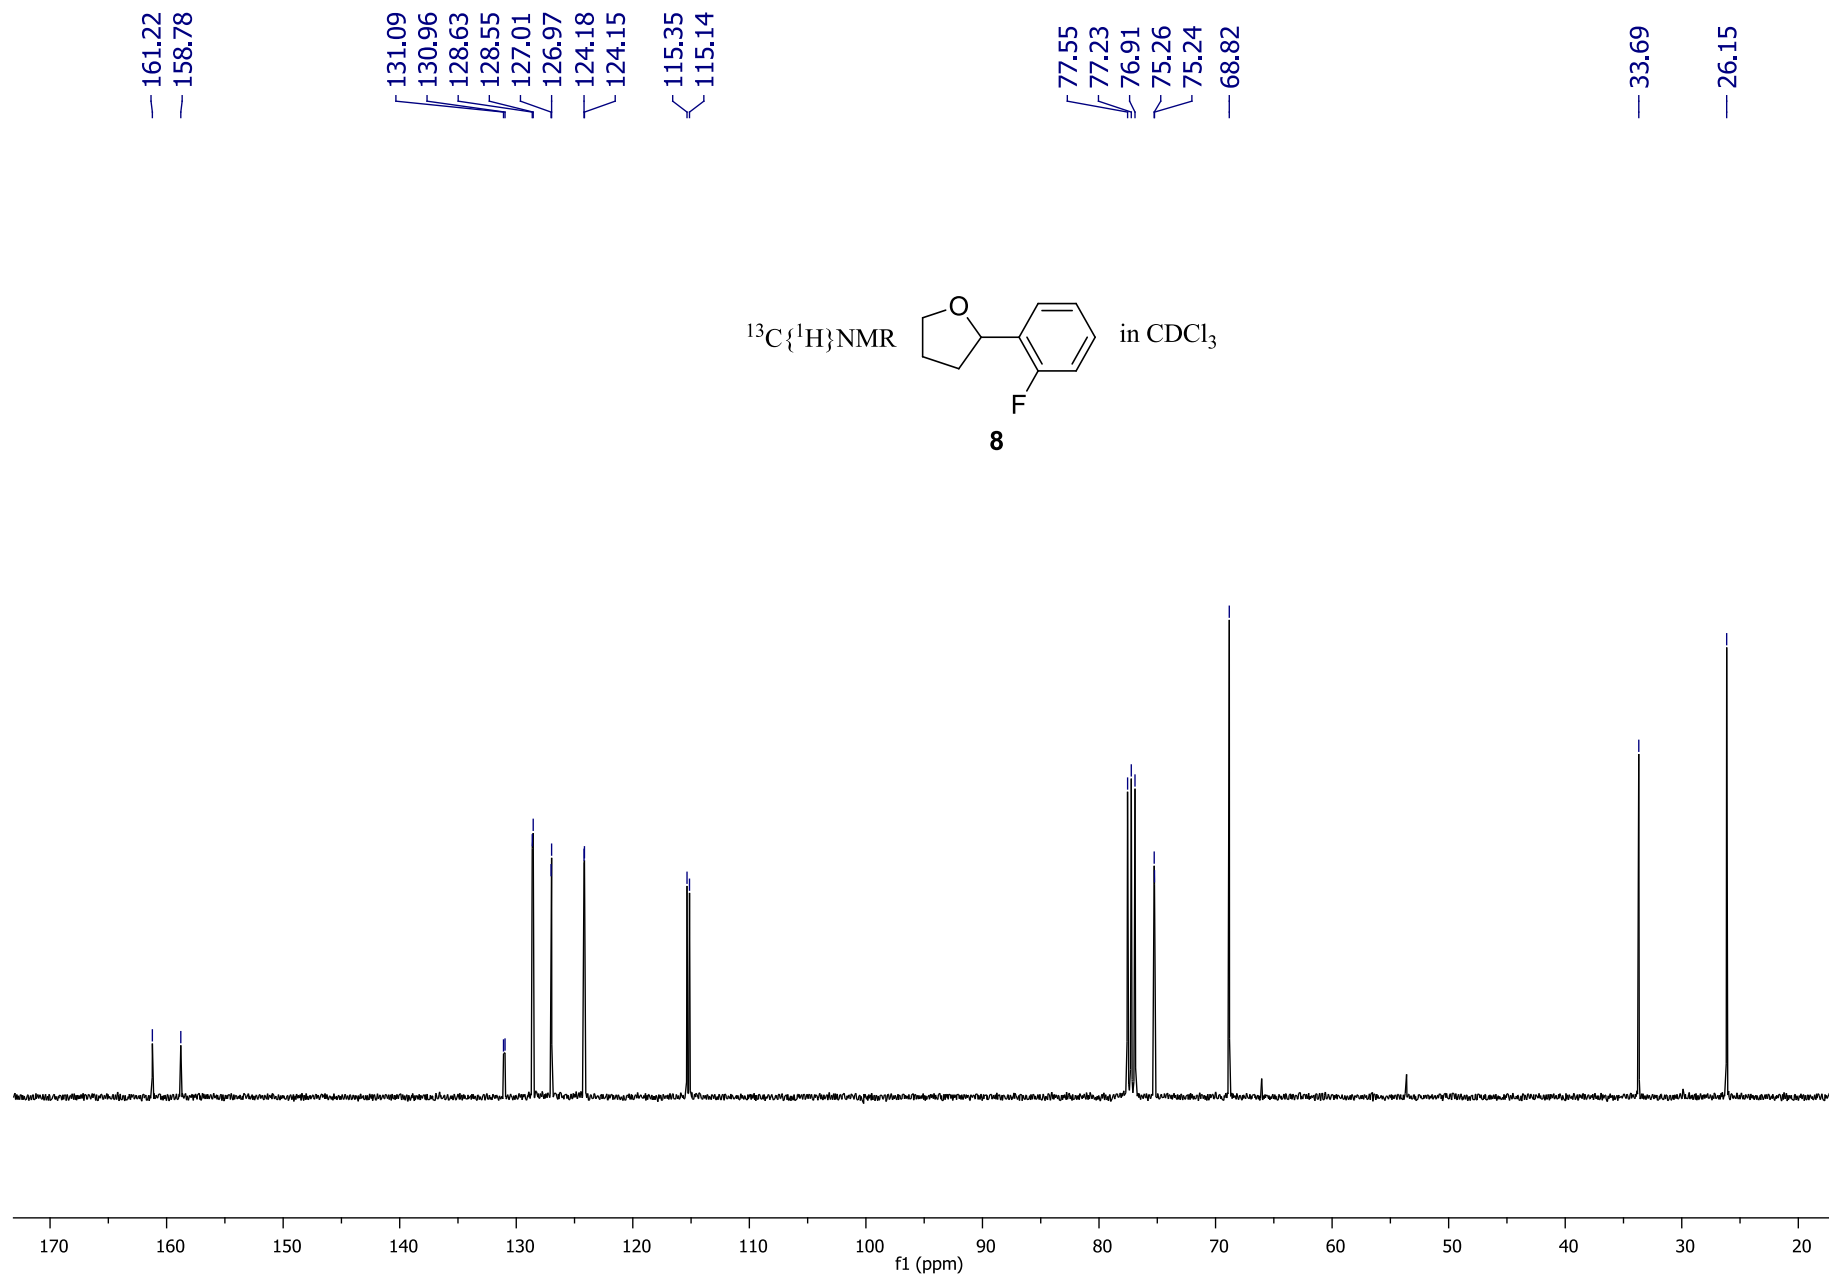

Supplement: Supplementary file 1 [file 4127470]
